# Supplementary material
Source: PubMed Central journal article supplement (PMC3358021)

## Supporting Information

**NanoSIMS analyses.** For NanoSIMS analyses of ITO-microarrays, mass resolution was set to  $\sim 10,000$  mass resolving power to minimize the contribution of isobaric interferences to the species of interest (e.g.,  $^{11}\text{B}^{16}\text{O}^-$  contribution to  $^{13}\text{C}^{14}\text{N}^- < 1/100$ ;  $^{13}\text{C}_2^-$  contribution to  $^{12}\text{C}^{14}\text{N}^- < 1/1000$ ). Analyses were performed in imaging mode to generate digital ion images of the sample for each ion species. Analytical conditions were optimized for speed of analysis, ability to spatially resolve adjacent hybridization locations, and analytical stability. The primary beam current was 5 to 7 pA  $\text{Cs}^+$ , which yielded a spatial resolution of 200-400 nm and a maximum count rate on the detectors of  $\sim 300,000$  cps  $^{12}\text{C}^{14}\text{N}$ . Analysis area was  $50 \times 50 \mu\text{m}^2$  with a pixel density of  $256 \times 256$  with 0.5 or 1 ms/pixel dwell time. For peak switching, one scan of the analysis area was made per species set, resulting in two scans per analytical cycle. With these conditions, reproducible secondary ion ratios could be measured for a maximum of 4 cycles through the two sets of measurements before the sample was largely consumed. Data were collected for 2 to 4 cycles.. Ion counts were corrected for detector dead time on a pixel by pixel basis.

Supplemental Table 1: list of probes specific for laboratory bacterial strains and San Francisco Bay natural community

| SEQUENCE ID   | PROBE SEQUENCE                  | SEQUENCE ID  | PROBE SEQUENCE                 | SEQUENCE ID | PROBE SEQUENCE               |
|---------------|---------------------------------|--------------|--------------------------------|-------------|------------------------------|
| Pstutzeri_1   | TAACCTGCCCGAAGGTTAGACT          | Veholerae_1  | AACTTAAACCACCTTCCTCCCTACTG     | Bereus_1    | TCACCTCGCGGCTTCGACGCTT       |
| Pstutzeri_2   | GTAAACCGTCCCGGAAAGGTTAGA        | Veholerae_2  | GTAGGTAACGCTCAAAATGATTAAGGT    | Bereus_2    | CGCTTTCATTCGAACCAATGCGGT     |
| Pstutzeri_3   | TGGTAAACCGTCCCGGAAAGGTTAG       | Veholerae_3  | TGATGGTAACGCTCAAAATGATTAAGG    | Bereus_3    | CTCTTAATCCATTCGCTCGACTTGG    |
| Pstutzeri_4   | GTAAACCGTCCCGGAAAGGTTAGACT      | Veholerae_4  | TAAGTAAACCACCTTCCTCCCTACT      | Bereus_4    | CCACCTCGGGCTTCGAGACTTCTT     |
| Pstutzeri_5   | ACTCCGTTGTAACCGTCCCGGAA         | Veholerae_5  | ACTTAAACCACCTTCCTCCCTACTGA     | Bereus_5    | CTCTGCTCCGGAAGGAGAAGCCCTA    |
| Pstutzeri_6   | CATCCGTTGTAACCGTCCCGGAA         | Veholerae_6  | TTAAGCTTAAACCACCTTCCTCCCTACT   | Bereus_6    | CGCGCTTTCATTCGAACCAATGCGGT   |
| Pstutzeri_7   | TCACCTCCGTTGTAACCGTCCCGGAA      | Veholerae_7  | TAAGGTAATTAACCACCTTCCTCCCTACT  | Bereus_7    | TCGTGCTCCGGAAGGAGAAGCCCTAT   |
| Pstutzeri_8   | ACCGTCCCGGTAACCGTCCCGGAA        | Veholerae_8  | CTGTAGGTAACCGTCAAAATGATTAAG    | Bereus_8    | ACCTGTCACTTCGTCCGGAAGGAG     |
| Pstutzeri_9   | ATCACTCCGTTGTAACCGTCCCGGAA      | Veholerae_9  | CTTAAACCACCTTCCTCCCTACTGAA     | Bereus_9    | GCTCTTAATCCAATTCGCTCGACTTG   |
| Pstutzeri_10  | CCGTTGTAACCGTCCCGGAAAGGT        | Veholerae_10 | ATTAAGTAAACCACCTTCCTCCCTACT    | Bereus_10   | CGCTTTCATTCGAACCAATGCGGT     |
| Pstutzeri_11  | CTCGTGGTAACCGTCCCGGAAAG         | Veholerae_11 | AAGGTAATTAACCACCTTCCTCCCTACT   | Bereus_11   | ACTCTGCTCCGGAAGGAGAAGCCCT    |
| Pstutzeri_12  | CCGTCGTCGGAAGGTTAGACTAGC        | Veholerae_12 | TTAACCACTTCCTCCCTACTGAAA       | Bereus_12   | GCTCCGGAAGGAGAAGCCCTATCTC    |
| Pstutzeri_13  | CCACCCCTTCGCATACTACTAGC         | Veholerae_13 | CTTCTGTAGGTAACGCTCAAAATGATT    | Bereus_13   | CTACTGTGCTCCGGAAGGAGAAGCC    |
| Pstutzeri_14  | TCACCACTTCGCATACTACTAGC         | Veholerae_14 | TTAATCACTTAAACCACCTTCCTCCCT    | Bereus_14   | TCCTAATCCATTCGCTCGACTTGCA    |
| Pstutzeri_15  | TTCCACCACTTCGCATACTACTAGC       | Veholerae_15 | ACTGACGTACTTGTGAGATTGCGCTC     | Bereus_15   | CTGCTCCGGAAGGAGAAGCCCTATC    |
| Pstutzeri_16  | AAATTCACCACTTCGCATACTACT        | Veholerae_16 | TACGACGTACTTGTGAGATTGCGCTC     | Bereus_16   | TAATCCATTCGCTCGACTTGCAATG    |
| Pstutzeri_17  | AAATTCACCACTTCGCATACTACT        | Veholerae_17 | ACTGACGTACTTGTGAGATTGCGCTC     | Bereus_17   | CTACTGCTCCGGAAGGAGAAGCC      |
| Pstutzeri_18  | GAATTCACCACTTCGCATACTACT        | Veholerae_18 | CTACGACGTACTTGTGAGATTGCGC      | Bereus_18   | GGTCTGCGACTTTCGTACCCGCTC     |
| Pstutzeri_19  | ATTCACCACTTCGCATACTACTACT       | Veholerae_19 | GACTGACGTACTTGTGAGATTGCGC      | Bereus_19   | TCCTCCGGAAGGAGAAGCCCTACTT    |
| Pstutzeri_20  | GGAAATTCACCACTTCGCATACTACT      | Veholerae_20 | AGGTAATTAACCACCTTCCTCCCT       | Bereus_20   | CTTAATCCATTCGCTCGACTTGCA     |
| Pstutzeri_21  | CAGGAAATTCACCACTTCGCATACTACT    | Veholerae_21 | GGTATTAACCACCTTCCTCCCT         | Bereus_21   | TTAATCCATTCGCTCGACTTGCAATG   |
| Pstutzeri_22  | AGGAAATTCACCACTTCGCATACTACT     | Veholerae_22 | GTTATTAACCACCTTCCTCCCT         | Bereus_22   | CTCCGGAAGGAGAAGCCCTATCTC     |
| Pstutzeri_23  | CAGTGTCAAGTATTAGCCAGGTTGGT      | Veholerae_23 | CGCGGTAATGCGCTTCGTGATAG        | Bereus_23   | GTCACTGCTCCGGAAGGAGAAGCC     |
| Pstutzeri_24  | TCAGTATTAGCCAGGTTGGTGGCT        | Veholerae_24 | TCGCGGTAATGCGCTTCGTGATAG       | Bereus_24   | CACCTCGGGTCTTCGACTGCTTGTG    |
| Pstutzeri_25  | TCAGTGTCAAGTATTAGCCAGGTTGG      | Veholerae_25 | CTTGTCAAGTTCAAATGCGATTCTCT     | Bereus_25   | GCTCTGCGACTTTCGTACCCGCTCA    |
| Pstutzeri_26  | GTGCAATATTAGCCAGGTTGGTGGC       | Veholerae_26 | TTGTCAAGTTCAAATGCGATTCTCTA     | Bereus_26   | GTGCAATTCGCTCCGGAAGGAGAAG    |
| Pstutzeri_27  | TCAGTATTAGCCAGGTTGGTGGC         | Veholerae_27 | CGGTAATGCGCTTCGTGATAG          | Bereus_27   | TCCTCCGGAAGGAGAAGCCCTACTCTA  |
| Pstutzeri_28  | CCTCAGTGTCAAGTATTAGCCAGGTT      | Veholerae_28 | CTCGGCAATTCGCGTAGCGCAAGG       | Bereus_28   | CGGCTTCGGAAGGAGAAGCCCTACTCTA |
| Pstutzeri_29  | CTCAGTGTCAAGTATTAGCCAGGTT       | Veholerae_29 | TCCACCTGGGCAATACTCCGTTAGCG     | Bereus_29   | CTCAAAAATGTTATCCGGAATTAGGCC  |
| Pstutzeri_30  | ACCTCAGTGTCAAGTATTAGCCAGGTT     | Veholerae_30 | GGCATACTCCGTTAGCGCAAGGCGCC     | Bereus_30   | CCTGTCACTTCGCTCCGGAAGGAGA    |
| Pstutzeri_31  | GTGCAATATTAGCCAGGTTGGTGGC       | Veholerae_31 | ACCTGGGCAATTCGCGTAGCGCAAG      | Bereus_31   | TTCAAAAATGTTATCCGGAATTAGGCC  |
| Pstutzeri_32  | AGTGTCAATATTAGCCAGGTTGGTGGC     | Veholerae_32 | CTGGGCAATTCGCGTAGCGCAAG        | Bereus_32   | CGACTGTCACTTCGCTCCGGAAGG     |
| Pstutzeri_33  | CACCTCAGTGTCAAGTATTAGCCAGGTT    | Veholerae_33 | CCACCTGGGCAATACTCCGTTAGCGC     | Bereus_33   | CTTTCGACTTCCTTCACCCGCTCAT    |
| Pstutzeri_34  | GCACCTCAGTGTCAAGTATTAGCCAGGTT   | Veholerae_34 | TGGGCAATTCGCGTAGCGCAAGGCGC     | Bereus_34   | GCTGTCACTTCGCTCCGGAAGGAGA    |
| Pstutzeri_35  | GCACCTCAGTGTCAAGTATTAGCCAGGTT   | Veholerae_35 | GGCATACTCCGTTAGCGCAAGGCGC      | Bereus_35   | GGGCTTTCGACTTTCGTACCTG       |
| Pstutzeri_36  | TTCCACCTCAGTGTCAAGTATTAGCCAGGTT | Veholerae_36 | GCATATCCGTTAGCGCAAGGCGCGA      | Bereus_36   | CGCGGCTTCGACTTTCGTACCCG      |
| Pstutzeri_37  | TGCACTCAGTGTCAAGTATTAGCCAGGTT   | Veholerae_37 | CCACCTGGGCAATACTCCGTTAGCGCA    | Bereus_37   | AGCTTCAATCCATTCGCTCGACTTG    |
| Pstutzeri_38  | AATCGTGTCAAGTATTAGCCAGGTT       | Veholerae_38 | CATATCCGTTAGCGCAAGGCGCGA       | Bereus_38   | ACTCTGGGCTTCGACTTTCGTACCCG   |
| Pstutzeri_39  | CACCACTTCGCATACTACTAGCT         | Veholerae_39 | CACCTGGGCAATACTCCGTTAGCGCA     | Bereus_39   | TCGCGGCTTCGACTTTCGTACCCG     |
| Pstutzeri_40  | ACAGGAAATTCACCACTTCGCATACTACT   | Veholerae_40 | ATATCCGTTAGCGCAAGGCGCGAAG      | Bereus_40   | CGCGGCTTCGACTTTCGTACCCG      |
| Pstutzeri_41  | CACAGGAAATTCACCACTTCGCATACTACT  | Veholerae_41 | TATCCGTTAGCGCAAGGCGCGAAGG      | Bereus_41   | TGCACTTCGACTTTCGTACCCG       |
| Pstutzeri_42  | ACAGGAAATTCACCACTTCGCATACTACT   | Veholerae_42 | CGCGGCTTCGCTTCGCGAGGTT         | Bereus_42   | ACACCTTCGACTTTCGTACCCG       |
| Pstutzeri_43  | GAAGTATTAGCCAGGTTGGTGGCT        | Veholerae_43 | TCGCGGCTTCGCTTCGCGAGGTT        | Bereus_43   | ACACCTTCGACTTTCGTACCCG       |
| Pstutzeri_44  | AAAGTATTAGCCAGGTTGGTGGCT        | Veholerae_44 | CGGAAGTTCGCTTCGCGAGGTT         | Bereus_44   | GCACCTTCGACTTTCGTACCCG       |
| Pstutzeri_45  | AAAGTATTAGCCAGGTTGGTGGCT        | Veholerae_45 | GGGCGCTTCGCTTCGCGAGGTT         | Bereus_45   | CACCACTTCGACTTTCGTACCCG      |
| Pstutzeri_46  | TCTGTGCAATTCGCGTAGGCTGTAAG      | Veholerae_46 | GAAGTTCGCTTCGCGAGGTT           | Bereus_46   | CATAAGGAGCACTTTCATCCGTT      |
| Pstutzeri_47  | GTTCCTGCAATTCGCGTAGGCTGTAAG     | Veholerae_47 | AGGTCGCTTCGCTTCGCGAGGTT        | Bereus_47   | CTCTCGGCTTCGACTTTCGTACCCG    |
| Pstutzeri_48  | AGTTCCTGCAATTCGCGTAGGCTGTAAG    | Veholerae_48 | CGACTTCGCTTCGCTTCGCGAGGTT      | Bereus_48   | CCACCTTCGACTTTCGTACCCG       |
| Pstutzeri_49  | AAAGTATTAGCCAGGTTGGTGGCT        | Veholerae_49 | AAAGTTCGCTTCGCGAGGTT           | Bereus_49   | AAGGAGCAAGCTTTCATCCGTT       |
| Pstutzeri_50  | CTTCTGCAATTCGCGTAGGCTGTAAG      | Veholerae_50 | CCGCTTCGCTTCGCGAGGTT           | Bereus_50   | CGGAAGGAGCACTTTCATCCGTT      |
| Pstutzeri_51  | TTCTGCAATTCGCGTAGGCTGTAAG       | Veholerae_51 | TCTAGGGCACAACCTCCAAGTAGAC      | Bereus_51   | AAAGTTCATTCGCTTCGCTCGACT     |
| Pstutzeri_52  | CTCAGTGTCAAGGCTGTGAAGTT         | Veholerae_52 | TCTAGGGCACAACCTCCAAGTAGAC      | Bereus_52   | TAAGGAGCACTTTCATCCGTT        |
| Pstutzeri_53  | TCTCAGTGTCAAGGCTGTGAAGTT        | Veholerae_53 | CTCTAGGGCACAACCTCCAAGTAGAC     | Bereus_53   | ATAAGGAGCAAGCTTTCATCCGTT     |
| Pstutzeri_54  | TACTACCCGTCGCGCTGAATCA          | Veholerae_54 | GCGACTTCGTTGAGATTGCGCTC        | Bereus_54   | CCGGAAGGAGCAAGCTTTCATCCGTT   |
| Pstutzeri_55  | GAGCCATGACGACTTGTGTCAGAG        | Veholerae_55 | CTGACTTCAAAATGCGATTTCGAGTTG    | Bereus_55   | CCGGAAGGAGCAAGCTTTCATCCGTT   |
| Pstutzeri_56  | ACAGCCATGACGACTTGTGTCAGAG       | Veholerae_56 | AGTTCATAAAATGCGATTTCGAGTTG     | Bereus_56   | CAAGCTTTCATCCGTTTCGCTCGAC    |
| Pstutzeri_57  | GACAGCCATGACGACTTGTGTCAGAG      | Veholerae_57 | TGCTAGTTCATAAAATGCGATTTCGAGTTG | Bereus_57   | AAGGAGCAAGCTTTCATCCGTT       |
| Pstutzeri_58  | CTGGAAGTTCCTGCAATTCGCGTAGG      | Veholerae_58 | GTTCATAAAATGCGATTTCGAGTTG      | Bereus_58   | GAAGGAGCAAGCTTTCATCCGTT      |
| Pstutzeri_59  | TGGAAGTTCCTGCAATTCGCGTAGG       | Veholerae_59 | GACTGTGCAATTCGCAATTCGCGTAGG    | Bereus_59   | GCAGCTTTCATCCGTTTCGCTCGA     |
| Pstutzeri_60  | GGAAGTTCCTGCAATTCGCGTAGG        | Veholerae_60 | CTAGCTGCAATTCGCAATTCGCGTAGG    | Bereus_60   | AGCAAGCTTTCATCCGTTTCGCTCGA   |
| eukaryotes_1  | AATAAGAACGGCCATGCACCA           | spingo_1_1   | CAGACTTGTCCCTCTGTACCATC        | alpha_7_1   | ACACTTCGTTTCGCGACCGGGAT      |
| eukaryotes_2  | CACCACTAAGAACGGCCATGCACCA       | spingo_1_2   | CAGCTTGTCCCTCTGTACCATC         | alpha_7_2   | CATCTTCGTTTCGCGACCGGGAT      |
| eukaryotes_3  | CCAACCTAAGAACGGCCATGCACCA       | spingo_1_3   | CGACTTGTCCCTCTGTACCATC         | alpha_7_3   | AAACATCTTCGTTTCGCGACCGGG     |
| eukaryotes_4  | CCAACCTAAGAACGGCCATGCACCA       | spingo_1_4   | TGCCAGTTCGCTCCCTGTACCA         | alpha_7_4   | GAAACACTTCGTTTCGCGACCGGG     |
| eukaryotes_5  | CCAACCTAAGAACGGCCATGCACCA       | spingo_1_5   | GACTTACGACCCAGAGGGGCTGT        | alpha_7_5   | AAAACACTTCGTTTCGCGACCGGG     |
| eukaryotes_6  | CCAACCTAAGAACGGCCATGCACCA       | spingo_1_6   | AGCAGTTCACGACCCAGAGGGGCTGT     | alpha_7_6   | AAACATCTTCGTTTCGCGACCGGG     |
| eukaryotes_7  | CCAACCTAAGAACGGCCATGCACCA       | spingo_1_7   | AAGCAGTTCACGACCCAGAGGGGCTGT    | alpha_7_7   | ATCTCTTCGTTTCGCGACCGGGAT     |
| eukaryotes_8  | CTCCACCACTAAGAACGGCCATGCACCA    | spingo_1_8   | CGAGTTCACGACCCAGAGGGGCTGT      | alpha_7_8   | CTGCACTTCGTTTCGCGACCGGGAT    |
| eukaryotes_9  | TTGGAGCTGGAATTCACCGGGCTGC       | spingo_1_9   | CGCTTACCTCTAGTATTCGAAG         | alpha_7_9   | CCACTTCACCCAGGCAAGCTGG       |
| eukaryotes_10 | CTCAGGCTTCCTTCGCGAATTCGAA       | spingo_1_10  | CATTCGCGCTACCTTGTGATTC         | alpha_7_10  | GGCACTTCGTTTCGCGACCGGGAT     |
| eukaryotes_11 | TCTCAGGCTTCCTTCGCGAATTCGAA      | spingo_1_11  | TGCTGTTGCGAGCTTGTGCTGCTC       | alpha_7_11  | AAAACCTTCGTTTCGCGACCGGG      |
| eukaryotes_12 | TATTTGAGCTGGAATTCACCGGGCTGC     | spingo_1_12  | GCTGTGCGAGCTTGTGCTGCTC         | alpha_7_12  | CCAAACTTCGTTTCGCGACCGGG      |
| eukaryotes_13 | ATTTGAGCTGGAATTCACCGGGCTGC      | spingo_1_13  | TGCTGTTGCGAGCTTGTGCTGCTC       | alpha_7_13  | GTTCGCACTTCGTTTCGCGACCGGG    |
| eukaryotes_14 | TAAGAACGGCCATGCACCA             | spingo_1_14  | CACATTCGCGCTACCTTGTGATTC       | alpha_7_14  | CCACCCAGGCAAGCTTCGTTTCGCT    |
| eukaryotes_15 | CTAAGAACGGCCATGCACCA            | spingo_1_15  | GTICACATTCGCGCTACCTTGTGATTC    | alpha_7_15  | TGCCACTTCACCCAGGCAAGCTTC     |
| eukaryotes_16 | ACTAAGAACGGCCATGCACCA           | spingo_1_16  | TCACATTCGCGCTACCTTGTGATTC      | alpha_7_16  | CAAACCTTCGTTTCGCGACCGGG      |
| eukaryotes_17 | CTCAGGCTTCCTTCGCGAATTCGAA       | spingo_1_17  | CGTTCGCTTACCGCTCAACTGTGTT      | alpha_7_17  | CTGCACTTCGTTTCGCGACCGGG      |
| eukaryotes_18 | CTATTGAGCTGGAATTCACCGGGCTGC     | spingo_1_18  | CGCTTCGCTTACCGCTCAACTGTGTT     | alpha_7_18  | CGTTCGCTTACCGCTCAACTGTGTT    |
| eukaryotes_19 | AAGAACGGCCATGCACCA              | spingo_1_19  | TCGCTGAGCGCTCAACTGTGATTCG      | alpha_7_19  | TCCGAACCTTCGTTTCGCGACCGGG    |
| eukaryotes_20 | AGCTTCCTTCGGAATTCGAA            | spingo_1_20  | TTGCTTACCGCTCAACTGTGATTCG      | alpha_7_20  | CACCCGAGCAAGCTTCGTTTCGCT     |
| eukaryotes_21 | GACTTCCTTCGGAATTCGAA            | spingo_1_21  | CTTTCGCTTACCGCTCAACTGTGATTCG   | alpha_7_21  | CCCGGAGCAAGCTTCGTTTCGCT      |
| eukaryotes_22 | CAGTATTGAGCTGGAATTCACCGGG       | spingo_1_22  | CTTTCGCTTACCGCTCAACTGTGATTCG   | alpha_7_22  | CGCTTCGCACTTCGTTTCGCGACCA    |
| eukaryotes_23 | TTTTCAGGCTTCCTTCGCGAATTCGAA     | spingo_1_23  | GTTCGAGCTTGTGCTTCGCTGATC       | alpha_7_23  | CCGAACTTCAGGTAGATTCACCGG     |
| eukaryotes_24 | GGCTTCGCTTCGCGAATTCGAA          | spingo_1_24  | TGTCGAGCTTGTGCTTCGCTGATC       | alpha_7_24  | AACTTCAGGTAGATTCACCGGCT      |
| eukaryotes_25 | CACCTCAACCACTAAGAACGGCCAT       | spingo_1_25  | CGCTTACCGCTCAACTGTGATTCG       | alpha_7_25  | TCACCCGAGCAAGCTTCGTTTCGCT    |
| archaea_1     | TTTGGTGTCTCCCGCAATTCCT          | spingo_2_1   | CTTCGCTACACCTTCGCTCCGCT        | alpha_8_1   | CCGCACTTCGTTTCGCGACCAAGCT    |
| archaea_2     | TGCTCCCGCAATTCCTTAAAGT          | spingo_2_2   | GCTATCGGGCTTCGAGGAATATCT       | alpha_8_2   | GCACCTTCGTTTCGCGACCAAGCT     |
| archaea_3     | CGCGCTTCGCTCCCGGTAAGGGCC        | spingo_2_3   | CGCTATCGGGCTTCGAGGAATATCT      | alpha_8_3   | AAAACCTTCAGGTAGATTCACCGGG    |
| archaea_4     | TTTCGCGCTTCGCTCCCGGTAAGGGCC     | spingo_2_4   | TCGGGCTTCGAGGAATATCTATGCT      | alpha_8_4   | GCTTCGCACTTCGTTTCGCGACCAAG   |
| archaea_5     | TCGCGCTTCGCTCCCGGTAAGGGCC       | spingo_2_5   | TTACCGCTACACCCCTGCTCCGCT       | alpha_8_5   | CCACCCGAGCAAGCTTCGTTTCGCT    |
| archaea_6     | TTTCGCGCTTCGCTCCCGGTAAGGGCC     | spingo_2_6   | TTTACCCTACACCCCTGCTCCGCT       | alpha_8_6   | TGCCACTTCGTTTCGCGACCAAGCT    |
| archaea_7     | GTGCTCCCGCAATTCCTTAAAGT         | spingo_2_7   | TCGCTTCGCTTACCGCTCAACTGTG      | alpha_8_7   | CAAACCTTCAGGTAGATTCACCGG     |
| archaea_8     | GGCTCCCGCAATTCCTTAAAGT          | spingo_2_8   | CGGCTTCGAGGAATATCTATGCA        | alpha_8_8   | CTGCACTTCGTTTCGCGACCAAGCT    |
| archaea_9     | CGCTTCGCTTCGCGGTAAGGGCCCT       | spingo_2_9   | AACTAATGGGGCGCATGCCCATCC       | alpha_8_9   | ACTCTTCACCCGAGCAAGCTTCGCT    |
| archaea_10    | CGCTTCGCTTCGCGGTAAGGGCCCT       | spingo_2_10  | CGCTTACCGCTCAACTGTGATTCG       | alpha_8_10  | CCACTTCACCCGAGCAAGCTTCGCT    |
| archaea_11    | GGCTTCGCTTCGCGGTAAGGGCCCT       | spingo_2_11  | ACTAATGGGGCGCATGCCCATCC        | alpha_8_11  | CAAACCTTCAGGTAGATTCACCGG     |
| archaea_12    | GTTCGCGCTTCGCTCCCGCAATTC        | spingo_2_12  | GCCATCGAGCACTTCGATAGAGTC       | alpha_8_12  | GTTCCACCCGAGCAAGCTTCGTTTCG   |
| archaea_13    | TTTTCGCGCTTCGCTCCCGCAATTC       | spingo_2_13  | AGCCATCGAGCACTTCGATAGAGTC      | alpha_8_13  | TCACCCGAGCAAGCTTCGTTTCGCT    |
| archaea_14    | GGTTCGCGCTTCGCTCCCGCAATTC       | spingo_2_14  | CAGCCTTCGAGCACTTCGATAGAGTC     | alpha_8_14  | CGTTCGCACTTCGTTTCGCGACCA     |
| archaea_15    | AGTTTCGCGCTTCGCTCCCGCAATTC      | spingo_2_15  | ACAGCCTTCGAGCACTTCGATAGAGTC    | alpha_8_15  | TTTCACCCGAGCAAGCTTCGTTTCG    |
| archaea_16    | CCTGCTTCGCGCTTCGCTCCCGCAATTC    | spingo_2_16  | CTTACTTCGAGCTACCGCACTTC        | alpha_8_16  | AACTTCAGGTAGATTCACCGGCT      |
| archaea_17    | CTTGTGGTTCCTCCCGCAATTC          | spingo_2_17  | ACTTACTTCGAGCTACCGCACTTC       | alpha_8_17  | CACCCGAGCAAGCTTCGTTTCGCT     |
| archaea_18    | CCCTTCGCTTCCTCCCGCAATTC         | spingo_2_18  | GCATGACTTACTTTCGAGCTACCG       | alpha_8_18  | TAAGCTTCGCTTCGCTTCGCTTCGCT   |
| archaea_19    | CCCTTCGCTTCCTCCCGCAATTC         | spingo_2_19  | CAGTACTTACTTTCGAGCTACCG        | alpha_8_19  | ACCCGAGCAAGCTTCGTTTCGCT      |
| archaea_20    | CCCTTCGCTTCCTCCCGCAATTC         | spingo_2_20  | GACTTACTTCGAGCTACCGCACTTC      | alpha_8_20  | CGCTTCGCACTTCGTTTCGCGACCA    |
| archaea_21    | CACCCCTTCGCTTCCTCCCGCAATTC      | spingo_2_21  | TGACTTACTTCGAGCTACCGCACTTC     | alpha_8_21  | AACTTCAGGTAGATTCACCGGCT      |

|                   |                            |                |                             |             |                              |
|-------------------|----------------------------|----------------|-----------------------------|-------------|------------------------------|
| archaea_22        | GTGTGTGCAAGGAGCAGGGACGTAT  | spingo_2_22    | CTGACTTACTTGTCAGCCTACGCAC   | alpha_8_22  | GCCGTGTGCAACTGTCCACCAGGAC    |
| archaea_23        | TGTGTGCAAGGAGCAGGGACGTAT   | spingo_2_23    | ACTGACTTACTTGTCAGCCTACGCAC  | alpha_8_23  | TAGATACCACCGGTTACTAAGCCG     |
| archaea_24        | CCGGTGTGCAAGGAGCAGGGACGT   | spingo_2_24    | CCATGCAGCCTCGTATAGAGTCC     | alpha_8_24  | AAGCCGCTGCCACTGTCCACCAGCA    |
| archaea_25        | GGTGTGTGCAAGGAGCAGGGACGT   | spingo_2_25    | CGCTTTCGTTTACGCCACTTACTGTA  | alpha_8_25  | GTAGATACCACCGGTTACTAAGCCG    |
| bacteria_1        | CGCTGTGTGCGGGACTTAACCCAA   | spingo_3_1     | AGTITTCCTCGAGTATGCCCCAGTT   | alpha_9_1   | TCTCCGGCCCAAACTCCCATCCAT     |
| bacteria_2        | GCTCGTGTGCGGGACTTAACCCAA   | spingo_3_2     | CGATTTCTCGAGTATGCCCCAGTT    | alpha_9_2   | CGTCTCCGGCCCAAACTCCCATCCAT   |
| bacteria_3        | GACTTAACCCAACTCTACGACACG   | spingo_3_3     | GTTTCTCGAGTATGCCCCAGTTA     | alpha_9_3   | GTTCTCCGGCCCAAACTCCCATCCAT   |
| bacteria_4        | AAACCCAACTCTACGACACGACT    | spingo_3_4     | TTTCTCGAGTATGCCCCAGTTA      | alpha_9_4   | TCTCCGGCCCAAACTCCCATCCAT     |
| bacteria_5        | ACTTAACCCAACTCTACGACACG    | spingo_3_5     | GAGTITTCCTCGAGTATGCCCCAGT   | alpha_9_5   | GCCGTCTCCGGCCCAAACTCCCATCCAT |
| bacteria_6        | TAACCCAACTCTACGACACGACT    | spingo_3_6     | TTGAGTITTCCTCGAGTATGCCCCAGT | alpha_9_6   | CCCGTCTCCGGCCCAAACTCCCATCCAT |
| bacteria_7        | GGACTTAACCCAACTCTACGACAC   | spingo_3_7     | TTACCGAAGTAAATGTGCCCCCTCG   | alpha_9_7   | CCCGTCTCCGGCCCAAACTCCCATCCAT |
| bacteria_8        | CTTAACCCAACTCTACGACACG     | spingo_3_8     | GTTCGACTCTACCCCTAAACACGGC   | alpha_9_8   | CCCGTCTCCGGCCCAAACTCCCATCCAT |
| bacteria_9        | TTAACCCAACTCTACGACACGACT   | spingo_3_9     | AGTITTCCTCGAGTATGCCCCAGTT   | alpha_9_9   | CCCGTCTCCGGCCCAAACTCCCATCCAT |
| bacteria_10       | GGGACTTAACCCAACTCTACGAC    | spingo_3_10    | CAATTCACCGAAGTAAATGTGCCCC   | alpha_9_10  | CCCGTCTCCGGCCCAAACTCCCATCCAT |
| bacteria_11       | ACTGCTGCCTCCGAGGACTGTGG    | spingo_3_11    | CATTTACCGAAGTAAATGTGCCCC    | alpha_9_11  | CCCGTCTCCGGCCCAAACTCCCATCCAT |
| bacteria_12       | CTGCTGGGGACTTAACCCAACT     | spingo_3_12    | GCCATTTACCGAAGTAAATGTGCC    | alpha_9_12  | CCCGTCTCCGGCCCAAACTCCCATCCAT |
| bacteria_13       | CGGGACTTAACCCAACTCTACG     | spingo_3_13    | TTGTAGCTCTACCCCTAAACACGGC   | alpha_9_13  | CCCGTCTCCGGCCCAAACTCCCATCCAT |
| bacteria_14       | TCGTTGGGGACTTAACCCAACT     | spingo_3_14    | GCCATTTACCGAAGTAAATGTGCC    | alpha_9_14  | CCCGTCTCCGGCCCAAACTCCCATCCAT |
| bacteria_15       | CGTTGGGGACTTAACCCAACTCT    | spingo_3_15    | TTCCTGAGCTATGCCCCAGTAAAG    | alpha_9_15  | CCCGTCTCCGGCCCAAACTCCCATCCAT |
| bacteria_16       | GTTCGGGGACTTAACCCAACTCT    | spingo_3_16    | CCCTTCGAGCTATGCCCCAGTAAAG   | alpha_9_16  | CCCGTCTCCGGCCCAAACTCCCATCCAT |
| bacteria_17       | TGCGGGACTTAACCCAACTCTAC    | spingo_3_17    | TCCTGAGCTCTACCCCTAAACACG    | alpha_9_17  | CCCGTCTCCGGCCCAAACTCCCATCCAT |
| bacteria_18       | TTCCGGGGACTTAACCCAACTCTCA  | spingo_3_18    | TGCTAGCTCTACCCCTAAACACGGC   | alpha_9_18  | CCCGTCTCCGGCCCAAACTCCCATCCAT |
| bacteria_19       | CCCCACTGCTCCCTCCGAGGAGT    | spingo_3_19    | CGCTCAGTCTCTCGAAGAGTAT      | alpha_9_19  | CCCGTCTCCGGCCCAAACTCCCATCCAT |
| bacteria_20       | CGGGGACTTAACCCAACTCTACG    | spingo_3_20    | CCTGAGCTATGCCCCAGTAAAGG     | alpha_9_20  | CCCGTCTCCGGCCCAAACTCCCATCCAT |
| bacteria_21       | CGCTGCTGTGGGGACTTAACCCAA   | spingo_3_21    | CTCCGAGTATGCCCCAGTAAAGG     | alpha_9_21  | CCCGTCTCCGGCCCAAACTCCCATCCAT |
| bacteria_22       | TCCCACCTGCTCCCTCCGAGGAG    | spingo_3_22    | CAAGTGTGACTCTACCCCTAAACA    | alpha_9_22  | CCCGTCTCCGGCCCAAACTCCCATCCAT |
| bacteria_23       | ATTCCCACCTGCTCCCTCCGAGG    | spingo_3_23    | TCTCTGGATGCTACTCGCATCT      | alpha_9_23  | CCCGTCTCCGGCCCAAACTCCCATCCAT |
| bacteria_24       | TTCCCACCTGCTCCCTCCGAGG     | spingo_3_24    | ATCTCTGGATGCTACTCGCATCT     | alpha_9_24  | CCCGTCTCCGGCCCAAACTCCCATCCAT |
| bacteria_25       | AAACCCAACTCTACGACACGACT    | spingo_3_25    | CTCTGGATGCTACTCGCATCT       | alpha_9_25  | CCCGTCTCCGGCCCAAACTCCCATCCAT |
| rhodobacter_1     | TCCCAGGGGGAATGCTTAATCCGT   | caldiithrix_1  | ACTCTCAGAGTCTATCGCCACGG     | alpha_10_1  | TCGCACCTGAGGCTCAGATCTAGTC    |
| rhodobacter_2     | TCCCAGGGGGAATGCTTAATCCGT   | caldiithrix_2  | CTCTCAGAGTCTATCGCCACGG      | alpha_10_2  | TCGCACCTGAGGCTCAGATCTAGTC    |
| rhodobacter_3     | CTCCCAGGGGGAATGCTTAATCC    | caldiithrix_3  | AACAGGGCTTTACACTCTCAGAGC    | alpha_10_3  | CTGCAGGCACTCCAGTTCGCCGA      |
| rhodobacter_4     | CTCCCAGGGGGAATGCTTAATCC    | caldiithrix_4  | CACTCTCAGAGTCTATCGCCACGG    | alpha_10_4  | CCCGTCTCCGGCCCAAACTCCCATCCAT |
| rhodobacter_5     | CCCGGCTCATGCTGTTACGGGAT    | caldiithrix_5  | ACAGGGCTTTACACTCTCAGAGC     | alpha_10_5  | CCCGTCTCCGGCCCAAACTCCCATCCAT |
| rhodobacter_6     | TACCCTGCTCATGCTGTTACGGGAT  | caldiithrix_6  | CACTCTCAGAGTCTATCGCCACGG    | alpha_10_6  | CCCGTCTCCGGCCCAAACTCCCATCCAT |
| rhodobacter_7     | ATTACCGGGCTATGCTGTTACGGG   | caldiithrix_7  | CAAGGGCTTTACACTCTCAGAGC     | alpha_10_7  | CCCGTCTCCGGCCCAAACTCCCATCCAT |
| rhodobacter_8     | TAGCCCAACCGTAAAGGGCATGAG   | caldiithrix_8  | TCTCAGAGGCTTACCTCGCCACGGC   | alpha_10_8  | CCCGTCTCCGGCCCAAACTCCCATCCAT |
| rhodobacter_9     | TACTTCCCAACCGTAAAGGGCATG   | caldiithrix_9  | TACTCTCTCAGAGTCTATCGCCACGG  | alpha_10_9  | CCCGTCTCCGGCCCAAACTCCCATCCAT |
| rhodobacter_10    | AGCCCAACCGTAAAGGGCATGAGG   | caldiithrix_10 | TCTCTGGACTCCCGACTTTCATGG    | alpha_10_10 | CCCGTCTCCGGCCCAAACTCCCATCCAT |
| rhodobacter_11    | GCCCAACCGTAAAGGGCATGAGGA   | caldiithrix_11 | TTACTACTCTCAGAGTCTATCGCC    | alpha_10_11 | CCCGTCTCCGGCCCAAACTCCCATCCAT |
| rhodobacter_12    | AACGTTTACCGGGCTATGCTGTT    | caldiithrix_12 | CCTCAGAGTCTATCGCCACGGC      | alpha_10_12 | CCCGTCTCCGGCCCAAACTCCCATCCAT |
| rhodobacter_13    | TTACCGGGCTATGCTGTTACGGGA   | caldiithrix_13 | CCTAACAGGGCTTTACACTCTCAG    | alpha_10_13 | CCCGTCTCCGGCCCAAACTCCCATCCAT |
| rhodobacter_14    | ACCGGGCTATGCTGTTACGGGAT    | caldiithrix_14 | AGGGCTTTACACTCTCAGAGTTC     | alpha_10_14 | CCCGTCTCCGGCCCAAACTCCCATCCAT |
| rhodobacter_15    | GCGGAATGCTTAATCCGTTAGGTT   | caldiithrix_15 | TTCTGGACTCCCGACTTTCATGGC    | alpha_10_15 | CCCGTCTCCGGCCCAAACTCCCATCCAT |
| rhodobacter_16    | CCAACCGTAAAGGGCATGAGGACT   | caldiithrix_16 | CTTGAGCTCCCGACTTTCATGGG     | alpha_10_16 | CCCGTCTCCGGCCCAAACTCCCATCCAT |
| rhodobacter_17    | CCGAGGGGAATGCTTAATCCGTTA   | caldiithrix_17 | TCTCAGAGTCTATCGCCACGGC      | alpha_10_17 | CCCGTCTCCGGCCCAAACTCCCATCCAT |
| rhodobacter_18    | CCCAACCGTAAAGGGCATGAGGAC   | caldiithrix_18 | GGGCTTTACACTCTCAGAGTTC      | alpha_10_18 | CCCGTCTCCGGCCCAAACTCCCATCCAT |
| rhodobacter_19    | AATTCCTCACTCTCTCGAATCT     | caldiithrix_19 | CTCTAACAGGGCTTTACACTCTC     | alpha_10_19 | CCCGTCTCCGGCCCAAACTCCCATCCAT |
| rhodobacter_20    | GAATTCCTCACTCTCTCGAATCT    | caldiithrix_20 | CTGAGCTCCCGACTTTCATGGG      | alpha_10_20 | CCCGTCTCCGGCCCAAACTCCCATCCAT |
| rhodobacter_21    | TATTCACCGGGCTATGCTGTTAC    | caldiithrix_21 | TCAGAGTCTATCGCCACGGC        | alpha_10_21 | CCCGTCTCCGGCCCAAACTCCCATCCAT |
| rhodobacter_22    | ACGTTTACCGGGCTATGCTGTTA    | caldiithrix_22 | CCCTCAACAGGCTCCGAAAGAA      | alpha_10_22 | CCCGTCTCCGGCCCAAACTCCCATCCAT |
| rhodobacter_23    | GAACGTTTACCGGGCTATGCTGTT   | caldiithrix_23 | ACCTCTAACAGGCTTTTACACTCC    | alpha_10_23 | CCCGTCTCCGGCCCAAACTCCCATCCAT |
| rhodobacter_24    | GGAAATTCCTCACTCTCTCGAAT    | caldiithrix_24 | GTTGGAAACCTCAACACTAGTGC     | alpha_10_24 | CCCGTCTCCGGCCCAAACTCCCATCCAT |
| rhodobacter_25    | GTAGCCCAACCGTAAAGGGCATGA   | caldiithrix_25 | GTGCAAACTCAACACTAGTGC       | alpha_10_25 | CCCGTCTCCGGCCCAAACTCCCATCCAT |
| margrA_1          | ACGAAGTATAGCCGGTCTTCTGTT   | chloroflexi_1  | CTCCGAGGAGTCTGTCAGTTTCCC    | alpha_12_1  | CCCGTCTCCGGCCCAAACTCCCATCCAT |
| margrA_2          | CAAGAAGTATAGCCGGTCTTCTGTT  | chloroflexi_2  | CTCCGAGGAGTCTGTCAGTTTCCC    | alpha_12_2  | CCCGTCTCCGGCCCAAACTCCCATCCAT |
| margrA_3          | GTACTACTCCGGTTCGCCAGTTTAC  | chloroflexi_3  | CGAATGGGTTTGACACCCACCA      | alpha_12_3  | CCCGTCTCCGGCCCAAACTCCCATCCAT |
| margrA_4          | TAAGGGACATACTGACTTGACATCA  | chloroflexi_4  | ACGATGGGTTTGACACCCACCA      | alpha_12_4  | CCCGTCTCCGGCCCAAACTCCCATCCAT |
| margrA_5          | ATAAGGCATACTGACTTGACATCA   | chloroflexi_5  | CTCTCCGAGGAGTCTGTCAGTTT     | alpha_12_5  | CCCGTCTCCGGCCCAAACTCCCATCCAT |
| margrA_6          | AAGGGACATACTGACTTGACATCA   | chloroflexi_6  | TCCGAGGAGTCTGTCAGTTTCCC     | alpha_12_6  | CCCGTCTCCGGCCCAAACTCCCATCCAT |
| margrA_7          | TTACTACTCCGGTTCGCCAGTTTAC  | chloroflexi_7  | GAATGGGTTTGACACCCACCA       | alpha_12_7  | CCCGTCTCCGGCCCAAACTCCCATCCAT |
| margrA_8          | CGTACTACTCCGGTTCGCCAGTTA   | chloroflexi_8  | GCTCTCCGAGGAGTCTGTCAGTTT    | alpha_12_8  | CCCGTCTCCGGCCCAAACTCCCATCCAT |
| margrA_9          | GGCTTACTACTCCGGTTCGCCAGTT  | chloroflexi_9  | CGCGAGGAGTCTGTCAGTTTCCC     | alpha_12_9  | CCCGTCTCCGGCCCAAACTCCCATCCAT |
| margrA_10         | CGCTTACTACTCCGGTTCGCCAGTT  | chloroflexi_10 | CGCTCCGAGGAGTCTGTCAGTT      | alpha_12_10 | CCCGTCTCCGGCCCAAACTCCCATCCAT |
| margrA_11         | ACATACTACTGACATCATCCCA     | chloroflexi_11 | ATATGGGTTTGACACCCACCA       | alpha_12_11 | CCCGTCTCCGGCCCAAACTCCCATCCAT |
| margrA_12         | TACTGACTTACATCATCCCACT     | chloroflexi_12 | CGAGGAGTCTGTCAGTTTCCC       | alpha_12_12 | CCCGTCTCCGGCCCAAACTCCCATCCAT |
| margrA_13         | GGACATACTGACTTGACATCATCC   | chloroflexi_13 | AGGAGTCTGTCAGTTTCCC         | alpha_12_13 | CCCGTCTCCGGCCCAAACTCCCATCCAT |
| margrA_14         | GACATACTGACTTGACATCATCC    | chloroflexi_14 | CGGTTGCGCATGTCAGTTTCCC      | alpha_12_14 | CCCGTCTCCGGCCCAAACTCCCATCCAT |
| margrA_15         | ATACGACTTACATCATCCCACT     | chloroflexi_15 | GAGTGTGCGCATGTCAGTTTCCC     | alpha_12_15 | CCCGTCTCCGGCCCAAACTCCCATCCAT |
| margrA_16         | CATACTGACTTGACATCATCCCA    | chloroflexi_16 | AGGCGTTCAGTTTCAATGCCAGG     | alpha_12_16 | CCCGTCTCCGGCCCAAACTCCCATCCAT |
| margrA_17         | AGGCATGACTGACTTGACATCATC   | chloroflexi_17 | TCCGTTGCGCATGTCAGTTTCCC     | alpha_12_17 | CCCGTCTCCGGCCCAAACTCCCATCCAT |
| margrA_18         | GGGACTTACTGACTTGACATCATC   | chloroflexi_18 | TCCCACGGTTCGCGCATGAGG       | alpha_12_18 | CCCGTCTCCGGCCCAAACTCCCATCCAT |
| margrA_19         | AGCCGTTACTACTCCGGTTCGCCAG  | chloroflexi_19 | TCAGGTTCAAGCGAGGTTACCG      | alpha_12_19 | CCCGTCTCCGGCCCAAACTCCCATCCAT |
| margrA_20         | GCAGGAAGTATGCCGGTGTCTTCT   | chloroflexi_20 | ATCATCTGGGCTTACCGTTCAG      | alpha_12_20 | CCCGTCTCCGGCCCAAACTCCCATCCAT |
| margrA_21         | GGCAGGAAGTATGCCGGTGTCTTCT  | chloroflexi_21 | GTGCACATGAGGCTCAGTTTCAAT    | alpha_12_21 | CCCGTCTCCGGCCCAAACTCCCATCCAT |
| margrA_22         | TGGCAGGAAGTATGCCGGTGTCTTCT | chloroflexi_22 | ATGAGGCTCAGTTTCAATGCCAGG    | alpha_12_22 | CCCGTCTCCGGCCCAAACTCCCATCCAT |
| margrA_23         | ACTGACTTGAACATCATCCCACT    | chloroflexi_23 | CAAGCTTTGCGCATGTCAGTTTCCC   | alpha_12_23 | CCCGTCTCCGGCCCAAACTCCCATCCAT |
| margrA_24         | CTGGCAGGAAGTATGCCGGTGTCTT  | chloroflexi_24 | CATGAGGCTCAGTTTCAATGCCAGG   | alpha_12_24 | CCCGTCTCCGGCCCAAACTCCCATCCAT |
| margrA_25         | ACGATTACTAGCGATTCCTGCTTCA  | chloroflexi_25 | GTAATCATCTCGGCTTACGTTCC     | alpha_12_25 | CCCGTCTCCGGCCCAAACTCCCATCCAT |
| vibriionaceae_1   | TATCCCCACATCAGGGCAATTTCC   | chloroflexi_21 | GGTACTCCCTTTCAGTTTGTCTAC    | alpha_13_1  | TCTAAGTGTTCACAGGCTCGGGAG     |
| vibriionaceae_2   | GACATTACTCGTGGCAAAACGAG    | chloroflexi_22 | AGGTGACTCCCTTTCAGTTTGTCTA   | alpha_13_2  | TAACTGTTCACAGGCTCGGGAG       |
| vibriionaceae_3   | CCGCATTACTCGTGGCAAAACGAG   | chloroflexi_23 | CCCTCCCATTAAGCGGGGAGTTT     | alpha_13_3  | TAACTGTTCACAGGCTCGGGAG       |
| vibriionaceae_4   | CCGCATTACTCGTGGCAAAACGAG   | chloroflexi_24 | CCAAAGTGTGGCTCATCGTACCGT    | alpha_13_4  | GCTCTAAGTTCACAGGCTCGGGAG     |
| vibriionaceae_5   | CCCCACATCAGGGCAATTTCCGAG   | chloroflexi_25 | CTCTCCGATGTTCAAGGAAGTTT     | alpha_13_5  | CGCTCTCAGGCTCAGAAAATAGCC     |
| vibriionaceae_6   | CCACATCAGGGCAATTTCCGAGC    | chloroflexi_26 | CCCTCCCATTAAGCGGGGAGTTT     | alpha_13_6  | GCTCTCAGGCTCAGAAAATAGCC      |
| vibriionaceae_7   | CCACATCAGGGCAATTTCCGAGCA   | chloroflexi_27 | TTCAAGCAAGTGTGGCTCATCGG     | alpha_13_7  | TCGCTTCAAGTTCACAGGCTCGGG     |
| vibriionaceae_8   | TCCCACATCAGGGCAATTTCCGACT  | chloroflexi_28 | AGCAAGCTTGGCTCATCGTACCGT    | alpha_13_8  | CGCTTAACTGTTCACAGGCTCGGG     |
| vibriionaceae_9   | CCGACATTACTCGTGGCAAAAC     | chloroflexi_29 | ACTTCCGATGTTCAAGCAAGCT      | alpha_13_9  | AAGTGTTCACAGGCTCGGGAGCC      |
| vibriionaceae_10  | ATCCCACATCAGGGCAATTTCCG    | chloroflexi_30 | ACCTCCCATTAAGCGGGGAGAT      | alpha_13_10 | CAGCTTAACTGTTCACAGGCTCGG     |
| vibriionaceae_11  | TGGTATCCCCACATCAGGGCAAT    | chloroflexi_31 | TCCCGATGTTCAAGCAAGCTT       | alpha_13_11 | ACGTTAACTGTTCACAGGCTCGG      |
| vibriionaceae_12  | CCCCACATCAGGGCAATTTCCGAG   | chloroflexi_32 | CTCCGATGTTCAAGCAAGCTT       | alpha_13_12 | CAGCTTAACTGTTCACAGGCTCGG     |
| vibriionaceae_13  | TCCCACATCAGGGCAATTTCCGAG   | chloroflexi_33 | AATGACCTCCCATTAAGCGGGG      | alpha_13_13 | ACGTTAACTGTTCACAGGCTCGG      |
| vibriionaceae_14  | CCCCACATCAGGGCAATTTCCGAG   | chloroflexi_34 | GAATGACCTCCCATTAAGCGGG      | alpha_13_14 | CAGCTTAACTGTTCACAGGCTCGG     |
| vibriionaceae_15  | CCACTTCCGCAATTTCCGAGG      | chloroflexi_35 | GTTCAAGCAAGTGTGGCTCATCGG    | alpha_13_15 | ACGTTAACTGTTCACAGGCTCGG      |
| vibriionaceae_16  | CACATCAGGGCAATTTCCGAGGCA   | chloroflexi_36 | CGAATGACCTCCCATTAAGCGGG     | alpha_13_16 | CAGCTTAACTGTTCACAGGCTCGG     |
| vibriionaceae_17  | CCACATCAGGGCAATTTCCGAGCA   | chloroflexi_37 | TGTTCAAGCAAGTGTGGCTCATCG    | alpha_13_17 | ACGTTAACTGTTCACAGGCTCGG      |
| vibriionaceae_18  | TTCCCACATCAGGGCAATTTCCG    | chloroflexi_38 | TGAATGACCTCCCATTAAGCG       | alpha_13_18 | CAGCTTAACTGTTCACAGGCTCGG     |
| vibriionaceae_19  | TCCCACATTACTCGTGGCAAAAC    | chloroflexi_39 | AAGCAAGTGTGGCTCATCGG        | alpha_13_19 | ACGTTAACTGTTCACAGGCTCGG      |
| vibriionaceae_20  | GGTATCCCCACATCAGGGCAAT     | chloroflexi_40 | TGACCTCCCATTAAGCGGGGAG      | alpha_13_20 | CAGCTTAACTGTTCACAGGCTCGG     |
| vibriionaceae_21  | CGAAGTGGCCGCTCTGTATGGC     | chloroflexi_41 | CACTCTCCGATGTTCAAGCAAG      | alpha_13_21 | ACGTTAACTGTTCACAGGCTCGG      |
| vibriionaceae_22  | CGAAGTGGCCGCTCTGTATGGC     | chloroflexi_42 | CCCTCCCATTAAGCGGGGAGTTT     | alpha_13_22 | CAGCTTAACTGTTCACAGGCTCGG     |
| vibriionaceae_23  | ATGATTTCCCCACATCAGGGCA     | chloroflexi_43 | CAAGTGTGGCTCATCGTACCGT      | alpha_13_23 | ACGTTAACTGTTCACAGGCTCGG      |
| vibriionaceae_24  | ACTCGTGGCAAAACGAGATAAGG    | chloroflexi_44 | CGATGTTCCCAAGCAAGTGGCT      | alpha_13_24 | CAGCTTAACTGTTCACAGGCTCGG     |
| vibriionaceae_25  | CGCATCTAGGTTGCTAGTCTGTCC   | chloroflexi_45 | CCCTCCCATTAAGCGGGGAGTTT     | alpha_13_25 | ACGTTAACTGTTCACAGGCTCGG      |
| alteromonadales_1 | CCCATTTGGGCAATTAAGGGCA     | chlorella_pl_1 | GCCACTATCGCAATCTGGCAAGC     | delta_1_1   | CCGAACTACGAACTGCTTCTGGGA     |
| alteromonadales_2 | TCCCACATCAGGGCAATTTCCGAG   | chlorella_pl_2 | CCACTATCGCAATCTGGCAAGC      | delta_1_2   | TCCGAACTACGAACTGCTTCTGGG     |
| alteromonadales_3 | TCCCACATCAGGGCAATTTCCGAG   | chlorella_pl_3 | CCACTATCGCAATCTGGCAAGC      | delta_1_3   | TTCGCGGCAACGAGGCGGCTTAC      |
| alteromonadales_4 | CCACTTGGGCAATTTAAAGGGG     | chlorella_pl_4 | CACATCTCGCAATCTGGCAAGC      | delta_1_4   | TTGTCGCGGCAACGAGGCGGCTTAC    |
| alteromonadales_5 | CCACTTGGGCAATTTAAAGGGGAG   | chlorella_pl_5 | CAGGCAAACTGGCATGCTACGAC     | delta_1_5   | TTGTCGCGGCAACGAGGCGGCTTAC    |
| alteromonadales_6 | ACTTGGGCAATTTAAAGGGGAG     | chlorella_pl_6 | GCAAATGCTGCTGATGCTGCTG      | delta_1_6   | TTGTCGCGGCAACGAGGCGGCTTAC    |
| alteromonadales_7 | CTTGGGCAATTTAAAGGGGAG      | chlorella_pl_7 | TGGCAAGCAAACTGGCATGCTG      | delta_1_7   | GGTTTGGCAACGACTTCTGTACA      |
| alteromonadales_8 | CACCTAAGGCAATTTCCCAAGCAT   | chlorella_pl_8 | CTGTGCTCACTTGGAACTTCCCT     | delta_1_8   | TCCCAGGAGGTTTGGCCCAAGCAT     |

|                        |                             |                 |                             |             |                              |
|------------------------|-----------------------------|-----------------|-----------------------------|-------------|------------------------------|
| alteromonadales_9      | TGAGCGTCAAGTTGACCCAGGTTGG   | chlorella_pl_9  | CCGTCCGCCACTCATGCCAATCTGG   | delta_1_9   | CCCGAAGGGTTTGCCCAACGACTT     |
| alteromonadales_10     | CGAAGCCCTTTGGTCGATGACACA    | chlorella_pl_10 | CGCCACTCATCGAATCTGGCAAG     | delta_1_10  | CCGAAGGGTTTGCCCAACGACTTCT    |
| alteromonadales_11     | ACAGAACCCGAGGTTCCGAGCTTCTA  | chlorella_pl_11 | CGTCCGCCACTCATCGAATCTGGCC   | delta_1_11  | CCCGAAGGGTTTGCCCAACGACTTCT   |
| alteromonadales_12     | CAGAACCAGGTTCCGAGCTTCTAG    | chlorella_pl_12 | CCTGTGTCACCTTGGAACTTCCCC    | delta_1_12  | CCCGGGCTTTCACACTGACTTAAAG    |
| alteromonadales_13     | AGAACCCGAGGTTCCGAGCTTCTAG   | chlorella_pl_13 | TCCGCCACTCATCGAATCTGGCA     | delta_1_13  | GCTTCTTCACTGAGTACCGTCAACA    |
| alteromonadales_14     | GA AAAACAGAACCCGAGGTTCCGAGC | chlorella_pl_14 | GTCGCCACTCATCGAATCTGGCAA    | delta_1_14  | AGGGCCCTGATCTCCCGAAGGGTTG    |
| alteromonadales_15     | GAACCCGAGGTTCCGAGCTTCTAGTA  | chlorella_pl_15 | ACCTGTGCCACTTGGAACTTCCC     | delta_1_15  | GGCCCTGATCTCCCGAAGGGTTG      |
| alteromonadales_16     | CCGAGGTTCCGAGCTTCTAGTAGAC   | chlorella_pl_16 | GGCAAGCCAAATGTCATGCGTACG    | delta_1_16  | GGCCCTGATCTCCCGAAGGGTTG      |
| alteromonadales_17     | CCGAGGTTCCGAGCTTCTAGTAGACA  | chlorella_pl_17 | GGCAAGCCAAATGTCATGCGTACG    | delta_1_17  | GATCTCCCGAAGGGTTTGCCCAACG    |
| alteromonadales_18     | AACCGAGGTTCCGAGCTTCTAGTAG   | chlorella_pl_18 | CCGTCCGCCACTCATCGAATCTG     | delta_1_18  | ATCCCGAAGGGTTTGCCCAACGACT    |
| alteromonadales_19     | ACCGAGGTTCCGAGCTTCTAGTAGA   | chlorella_pl_19 | CACCTGTGCCACTTGGAACTTCC     | delta_1_19  | CATCCCGAAGGGTTTGCCCAACG      |
| alteromonadales_20     | AACAGAACCCGAGGTTCCGAGCTTCT  | chlorella_pl_20 | ACCGTCCGCCACTCATCGAATCT     | delta_1_20  | ACCTTAGGGCTGCATCCCGAAG       |
| alteromonadales_21     | AACAGAACCCGAGGTTCCGAGCTTCT  | chlorella_pl_21 | CCACCTGTGCCACTTGGAACTTCC    | delta_1_21  | CCTTAGGGCTGCATCCCGAAG        |
| alteromonadales_22     | CGAAGCCCTTTGGTCGATGACACA    | chlorella_pl_22 | CACCGTCCGCCACTCATCGAATC     | delta_1_22  | TACTTAGGGCTGCATCCCGAAG       |
| alteromonadales_23     | GAAGCCCTTTGGTCGATGACACA     | chlorella_pl_23 | TCACCGTCCGCCACTCATCGAAT     | delta_1_23  | ATACCTTAGGGCTGCATCCCGAAG     |
| alteromonadales_24     | AACCCCTTTGGTCGATGACACA      | chlorella_pl_24 | ACCACCTGTGCCACTTGGAACTT     | delta_1_24  | CTTAGGGCTGCATCCCGAAG         |
| alteromonadales_25     | GAAGCCCTTTGGTCGATGACACA     | chlorella_pl_25 | CACACCTGTGCCACTTGGAACTT     | delta_1_25  | CATACCTTAGGGCTGCATCCCGAAG    |
| poliariabacterales_1   | GCCAGATGGCTGCTATTGTCACAT    | plastid_1_1     | GGTCTCACAGCTTGGCATCTATTG    | delta_2_1   | CCTCAGTCTTTCATAGGATCTCCG     |
| poliariabacterales_2   | TCCAGATGGCTGCTATTGTCACAT    | plastid_1_2     | TCTCCAGGCACTTGGCAATCTG      | delta_2_2   | GGCCACCTTTCATAGGATCTCCG      |
| poliariabacterales_3   | TTCAGATGGCTGCTATTGTCACAT    | plastid_1_3     | CCACGTTGATCGATACACGCAATG    | delta_2_3   | AGGCCACCTTTCATAGGATCTCCG     |
| poliariabacterales_4   | CCAGATGGCTGCTATTGTCACAT     | plastid_1_4     | ATGCACCACTGATGTTGCTGCCG     | delta_2_4   | AGGGCACTCCAGTCTTTCATAGG      |
| poliariabacterales_5   | TTCAGATGGCTGCTATTGTCACAT    | plastid_1_5     | CACACCTGATGTTGCTGCCGAA      | delta_2_5   | GAGGCCACCTTTCATAGGATCTCCG    |
| poliariabacterales_6   | TCCTCAGGTCAGTACATACGATG     | plastid_1_6     | AACCAACGATGATGTCGACACG      | delta_2_6   | AGGGCACTCCAGTCTTTCATAGG      |
| poliariabacterales_7   | CCCTCAGGTCAGTACATACGATG     | plastid_1_7     | ACCACCTGATGTTGCTGCCGAA      | delta_2_7   | AGGGCACTCCAGTCTTTCATAGG      |
| poliariabacterales_8   | CCCTCAGGTCAGTACATACGATG     | plastid_1_8     | CTTCCAGGCACTTGGCAATCTG      | delta_2_8   | AGGGCACTCCAGTCTTTCATAGG      |
| poliariabacterales_9   | CCCTCAGGTCAGTACATACGATG     | plastid_1_9     | TGACACCTGATGTTGCTGCCGAA     | delta_2_9   | AGGGCACTCCAGTCTTTCATAGG      |
| poliariabacterales_10  | TTCGATAGTGGCTGCTATTGTCAC    | plastid_1_10    | CTTCCAGGCACTTGGCAATCTG      | delta_2_10  | AGGGCACTCCAGTCTTTCATAGG      |
| poliariabacterales_11  | CGTCCCTCAGGCTCAGTACATACG    | plastid_1_11    | TGACACCTGATGTTGCTGCCGAA     | delta_2_11  | AGGGCACTCCAGTCTTTCATAGG      |
| poliariabacterales_12  | AGACCCCTCAGTACATACGATG      | plastid_1_12    | ACACCACTGATGTTGCTGCCGAA     | delta_2_12  | AGGGCACTCCAGTCTTTCATAGG      |
| poliariabacterales_13  | CGTGTAGTCACTGAGTCAATGCCCC   | plastid_1_13    | CACACCTGATGTTGCTGCCGAA      | delta_2_13  | AGGGCACTCCAGTCTTTCATAGG      |
| poliariabacterales_14  | TTCGATAGTGGCTGCTATTGTCAC    | plastid_1_14    | CTTCCAGGCACTTGGCAATCTG      | delta_2_14  | AGGGCACTCCAGTCTTTCATAGG      |
| poliariabacterales_15  | TTCGATAGTGGCTGCTATTGTCAC    | plastid_1_15    | TGACACCTGATGTTGCTGCCGAA     | delta_2_15  | AGGGCACTCCAGTCTTTCATAGG      |
| poliariabacterales_16  | TGCTCCCTCAGGCTCAGTACATACG   | plastid_1_16    | CTTCCAGGCACTTGGCAATCTG      | delta_2_16  | AGGGCACTCCAGTCTTTCATAGG      |
| poliariabacterales_17  | TGCTCCCTCAGGCTCAGTACATACG   | plastid_1_17    | GGTCTCACAGCTTGGCATCTATTG    | delta_2_17  | AGGGCACTCCAGTCTTTCATAGG      |
| poliariabacterales_18  | TCGATAGTGGCTGCTATTGTCAC     | plastid_1_18    | CCACGTTGATCGATACACGCAATG    | delta_2_18  | AGGGCACTCCAGTCTTTCATAGG      |
| poliariabacterales_19  | CAGACCCCTCAGTACATACGATG     | plastid_1_19    | ATGCACCACTGATGTTGCTGCCG     | delta_2_19  | AGGGCACTCCAGTCTTTCATAGG      |
| poliariabacterales_20  | TTTCCCTCAGGCTCAGTACATACG    | plastid_1_20    | CACACCTGATGTTGCTGCCGAA      | delta_2_20  | AGGGCACTCCAGTCTTTCATAGG      |
| poliariabacterales_21  | CGTGTAGTCACTGAGTCAATGCCCC   | plastid_1_21    | AACCAACGATGATGTCGACACG      | delta_2_21  | AGGGCACTCCAGTCTTTCATAGG      |
| poliariabacterales_22  | CGCAGATTTATACCGGTTACGCAAC   | plastid_1_22    | ACCACCTGATGTTGCTGCCGAA      | delta_2_22  | AGGGCACTCCAGTCTTTCATAGG      |
| poliariabacterales_23  | GGCAGATTTATACCGGTTACGCAAC   | plastid_1_23    | CTTCCAGGCACTTGGCAATCTG      | delta_2_23  | AGGGCACTCCAGTCTTTCATAGG      |
| poliariabacterales_24  | CACCTGTGACTTAATGACCGCTGG    | plastid_1_24    | TGACACCTGATGTTGCTGCCGAA     | delta_2_24  | AGGGCACTCCAGTCTTTCATAGG      |
| poliariabacterales_25  | CCTGTGACTTAATGACCGCTGG      | plastid_1_25    | CTTCCAGGCACTTGGCAATCTG      | delta_2_25  | AGGGCACTCCAGTCTTTCATAGG      |
| desulfuovibrionales_1  | CCGAGATGGCTGATCGAATTAC      | plastid_2_1     | CAGGTAACGTGAGAATCTTCCCT     | delta_3_1   | GGCCACAGAAAGGGTCAACACTTCT    |
| desulfuovibrionales_2  | CCGAGATGGCTGATCGAATTAC      | plastid_2_2     | AGGTAACGTGAGAATCTTCCCT      | delta_3_2   | GGCCACAGAAAGGGTCAACACTTCT    |
| desulfuovibrionales_3  | TCACCCGAGCATGCTGATCTCGAAT   | plastid_2_3     | GGTAACGTGAGAATCTTCCCT       | delta_3_3   | GGCCACAGAAAGGGTCAACACTTCT    |
| desulfuovibrionales_4  | TTACCCGAGCATGCTGATCTCGAAT   | plastid_2_4     | TACAGTAACGTGAGAATCTTCCCT    | delta_3_4   | GGCCACAGAAAGGGTCAACACTTCT    |
| desulfuovibrionales_5  | GCACCCCTAATTTCTAGAGGTTCC    | plastid_2_5     | CGGTTAGTATAATACCGCATGGG     | delta_3_5   | GGCCACAGAAAGGGTCAACACTTCT    |
| desulfuovibrionales_6  | AGGGCACTTCTAATTTCTAGAGG     | plastid_2_6     | AATCCAGTATAATACCGCATGGG     | delta_3_6   | GGCCACAGAAAGGGTCAACACTTCT    |
| desulfuovibrionales_7  | GGGCACTTCTAATTTCTAGAGG      | plastid_2_7     | CTGTATGACGTTCCGAGGTTGGT     | delta_3_7   | GGCCACAGAAAGGGTCAACACTTCT    |
| desulfuovibrionales_8  | CCCTCTAATTTCTAGAGGTTCC      | plastid_2_8     | CTGTATGACGTTCCGAGGTTGGT     | delta_3_8   | GGCCACAGAAAGGGTCAACACTTCT    |
| desulfuovibrionales_9  | CCCTCTAATTTCTAGAGGTTCC      | plastid_2_9     | TACGGCCGAGCTTCTTCTAGGCA     | delta_3_9   | GGCCACAGAAAGGGTCAACACTTCT    |
| desulfuovibrionales_10 | ATTTCTAGAGGTTCCCTGGATGTC    | plastid_2_10    | ATACCGATGGTTCGATACATGGCA    | delta_3_10  | GGCCACAGAAAGGGTCAACACTTCT    |
| desulfuovibrionales_11 | AGGGTACCGTCAAAATGCTACCC     | plastid_2_11    | CCGTTAGTACGTTCCGAGGTTGG     | delta_3_11  | GGCCACAGAAAGGGTCAACACTTCT    |
| desulfuovibrionales_12 | GAGGTTACCGTCAAAATGCTACCC    | plastid_2_12    | AGCCGGAGCTTCTTCTAGGCA       | delta_3_12  | GGCCACAGAAAGGGTCAACACTTCT    |
| desulfuovibrionales_13 | GGTACCGTCAAAATGCTACCC       | plastid_2_13    | GGCCCTTCTCCAAAGGTTAGAA      | delta_3_13  | GGCCACAGAAAGGGTCAACACTTCT    |
| desulfuovibrionales_14 | TTTTCTAGAGGTTCCCTGGATGTC    | plastid_2_14    | AGCCGGAGCTTCTTCTAGGCA       | delta_3_14  | GGCCACAGAAAGGGTCAACACTTCT    |
| desulfuovibrionales_15 | TTCGATAGGTTCCCTGGATGTC      | plastid_2_15    | CAGCCGGAGCTTCTTCTAGGCA      | delta_3_15  | GGCCACAGAAAGGGTCAACACTTCT    |
| desulfuovibrionales_16 | TGAGGTTACCGTCAAAATGCTACCC   | plastid_2_16    | CCGTTAGTACGTTCCGAGGTTGG     | delta_3_16  | GGCCACAGAAAGGGTCAACACTTCT    |
| desulfuovibrionales_17 | CCCTCTAATTTCTAGAGGTTCC      | plastid_2_17    | TAATCAGCCGGAGCTTCTTCTAGG    | delta_3_17  | GGCCACAGAAAGGGTCAACACTTCT    |
| desulfuovibrionales_18 | CACCTCTAATTTCTAGAGGTTCC     | plastid_2_18    | TAATCAGCCGGAGCTTCTTCTAGG    | delta_3_18  | GGCCACAGAAAGGGTCAACACTTCT    |
| desulfuovibrionales_19 | GGCAGCTTCTAATTTCTAGAGGTT    | plastid_2_19    | ATCAGCCGGAGCTTCTTCTAGG      | delta_3_19  | GGCCACAGAAAGGGTCAACACTTCT    |
| desulfuovibrionales_20 | CCTCTAATTTCTAGAGGTTCC       | plastid_2_20    | GGCCGGTCTTCTCAACGGTTAGAA    | delta_3_20  | GGCCACAGAAAGGGTCAACACTTCT    |
| desulfuovibrionales_21 | CAACCTTCTAATTTCTAGAGGTT     | plastid_2_21    | CCGGAGCTTCTTCTAGGCA         | delta_3_21  | GGCCACAGAAAGGGTCAACACTTCT    |
| desulfuovibrionales_22 | ATCAAGGCTTCTAATTTCTAGAGG    | plastid_2_22    | CCATGGGTGATACATGGCAATCT     | delta_3_22  | GGCCACAGAAAGGGTCAACACTTCT    |
| desulfuovibrionales_23 | TTCTCTGTTAGCTCCGCGGTTGG     | plastid_2_23    | GGCAGTGGTGCATACATGGCAAT     | delta_3_23  | GGCCACAGAAAGGGTCAACACTTCT    |
| desulfuovibrionales_24 | ATTTCTGTTAGCTCCGCGGTTGG     | plastid_2_24    | TCCGATGGGTGATACATGGCAAT     | delta_3_24  | GGCCACAGAAAGGGTCAACACTTCT    |
| desulfuovibrionales_25 | CCTAGAGGTTCCCTGGATGTC       | plastid_2_25    | ACCAGTGGGTGATACATGGCAAT     | delta_3_25  | GGCCACAGAAAGGGTCAACACTTCT    |
| aquificae_1            | AACAGAGCTCCACCGGTTGTGG      | plastid_3_1     | CACCGTGCATATCTGACCCGAGT     | altero_1_1  | CCCATCTGGGCACTTAAAGGGCA      |
| aquificae_2            | ACCAGAGCTCCACCGGTTGTGG      | plastid_3_2     | TTACCCGTCGATATCTGACCCGAG    | altero_1_2  | ATCCCATGGGCACTTAAAGGGCA      |
| aquificae_3            | AAACAGAGCTCCACCGGTTGTGG     | plastid_3_3     | TCACCGTGCATATCTGACCCGAG     | altero_1_3  | TCCCATGGGCACTTAAAGGGCA       |
| aquificae_4            | TGCCACTGAGCGCTGTGATGACCC    | plastid_3_4     | GGCCGAGTATCTAGGCTACAATCC    | altero_1_4  | CACCTGGGCACTTAAAGGGCA        |
| aquificae_5            | TAAACAGAGCTCCACCGGTTGTGG    | plastid_3_5     | TAGCCGAGTTCAGGCTACAATCC     | altero_1_5  | CACCTGGGCACTTAAAGGGCA        |
| aquificae_6            | CCAGCTGTAGCGCTGTGATGACCC    | plastid_3_6     | GACCTCATCTCAGCTTCTCCCAAT    | altero_1_6  | ACTTTGGGCACTTAAAGGGCA        |
| aquificae_7            | CCAGCTGTAGCGCTGTGATGACCC    | plastid_3_7     | AGCCGAGTTCAGGCTACAATCCG     | altero_1_7  | CTTTGGGCACTTAAAGGGCA         |
| aquificae_8            | CACACTGTAGCGCTGTGATGACCC    | plastid_3_8     | GCCGAGTTCAGGCTACAATCCG      | altero_1_8  | CTTGTGATGACCTCAAGCTAGAG      |
| aquificae_9            | GCATAAAGGGCATACTGACCTGAGC   | plastid_3_9     | CCGAGTTCAGGCTACAATCCG       | altero_1_9  | ACAGAACCAGGTTCCGAGCTTCTA     |
| aquificae_10           | GTAAACAGAGCTCCACCGGTTGTG    | plastid_3_10    | CCCTCGTAGGACTTGTTCGTTCT     | altero_1_10 | AGAACCCGAGGTTCCGAGCTTCTA     |
| aquificae_11           | ATTGCCCCAGATTTCCCACTGTGTC   | plastid_3_11    | TCCCTGAGGACTTGTTCGTTCTA     | altero_1_11 | AGAACCCGAGGTTCCGAGCTTCTA     |
| aquificae_12           | CCATTTGCCACGATTTCCCACTGTG   | plastid_3_12    | CCGTTAGGACTTGTTCGTTCTA      | altero_1_12 | GA AAAACAGAACCCGAGGTTCCGAG   |
| aquificae_13           | CCCATTTGCCACGATTTCCCACTGTG  | plastid_3_13    | GGACCTACCTCACCTTCTCCAA      | altero_1_13 | GAACCCGAGGTTCCGAGCTTCTA      |
| aquificae_14           | CCCATTTGCCACGATTTCCCACTGTG  | plastid_3_14    | C7AAAGCAATTCATCCACGCGGT     | altero_1_14 | CCGAGGTTCCGAGCTTCTAGTAGA     |
| aquificae_15           | CCCATTTGCCACGATTTCCCACTGTG  | plastid_3_15    | CTTAAAGGATTCATCCACGCGG      | altero_1_15 | CAACGAGGTTCCGAGCTTCTAGTAG    |
| aquificae_16           | CCCATTTGCCACGATTTCCCACTGTG  | plastid_3_16    | CCCTAAAGCAATTCATCCACGCGG    | altero_1_16 | ACCGAGGTTCCGAGCTTCTAGTAGA    |
| aquificae_17           | CCCATTTGCCACGATTTCCCACTGTG  | plastid_3_17    | CCCTAAAGCAATTCATCCACGCGG    | altero_1_17 | ACCGAGGTTCCGAGCTTCTAGTAGA    |
| aquificae_18           | ATTAACCCAGAGCTCCACCGGTTGG   | plastid_3_18    | ACCTTAAAGCAATTCATCCACGCG    | altero_1_18 | AACAGAACCCGAGGTTCCGAGCTTCT   |
| aquificae_19           | TTTCCACAGATTTCCCACTGTGCCC   | plastid_3_19    | ACATAAGGGCATGCTGACTTGACC    | altero_1_19 | AACAGAACCCGAGGTTCCGAGCTTCT   |
| aquificae_20           | GCCACAGATTTCCCACTGTGCCCC    | plastid_3_20    | GTTCCGTTTAAATCCAGTGTGGC     | altero_1_20 | CCCACTGTGTTCCCACTGTGCCCC     |
| aquificae_21           | CAGACCTCCACCGGTTGTGCGGG     | plastid_3_21    | C7AAAGCAATTCATCCACGCGG      | altero_1_21 | CCGACCTGACAGCACTTAAAGTGA     |
| aquificae_22           | GGCATAAAGGGCATACTGACCTGAC   | plastid_3_22    | CCGATTTGCTTGTGTCAGGCTTCCG   | altero_1_22 | TGGGCAACTTAAAGGGCAAGCGG      |
| aquificae_23           | GCAGTTCCGAATGCTTGGCGAAGT    | plastid_3_23    | CACCGGATTTGCTTGTGTCAGGCTT   | altero_1_23 | GGGCAACTTAAAGGGCAAGCGG       |
| aquificae_24           | CAGTTCGGAATGCTTGGCGAAGT     | plastid_3_24    | CACCGGATTTGCTTGTGTCAGGCTT   | altero_1_24 | TGGGCAACTTAAAGGGCAAGCGG      |
| aquificae_25           | CCGAGTTCGGAATGCTTGGCGAAGT   | plastid_3_25    | CTTCCACCGGCTTATGTTGGT       | altero_1_25 | GGTTCGAGCTTCTAGTAGACTG       |
| bacilli_1              | CACCTGTCCCGAAGGAGAAGCCC     | plastid_4_1     | CTTAAAGCCGCTCCGAATGGT       | altero_2_1  | CTCTCACTGGGCTTCTTTGGCCG      |
| bacilli_2              | GTCACTGTCTCCCGAAGGAGAAGCC   | plastid_4_2     | ACTTAAAGCCGCTCCGAATGGT      | altero_2_2  | CCCTCGAAAGGCAAGTTTCCCAAG     |
| bacilli_3              | CTGTCCCGAAGGAGAAGCCCTATC    | plastid_4_3     | TACCTTAAAGCCGCTCCGAATGG     | altero_2_3  | CCCTCGAAAGGCAAGTTTCCCAAG     |
| bacilli_4              | TCACCTGTCTCCCGAAGGAGAAGCC   | plastid_4_4     | ACCTTAAAGCCGCTCCGAATGG      | altero_2_4  | CACCTGGGCTCTTTTGGCCG         |
| bacilli_5              | TCTGTCCCGAAGGAGAAGCCCTAT    | plastid_4_5     | AGCCCTACCTTAAAGCCGCTCC      | altero_2_5  | CTTGGGCTCTTTTGGCCG           |
| bacilli_6              | GTCTCCCGAAGGAGAAGCCCTATCT   | plastid_4_6     | TAAAGCCGCTCCGAATGGT         | altero_2_6  | CGACATTTTAAAGGGTCCGCTCC      |
| bacilli_7              | CTTGTCCCGAAGGAGAAGCCCTAT    | plastid_4_7     | TAAAGCCGCTCCGAATGGT         | altero_2_7  | CACCTGGGCTCTTTTGGCCG         |
| bacilli_8              | CTCTCCCGAAGGAGAAGCCCTATCT   | plastid_4_8     | TAGCCCTACCTTAAAGCCGCTCC     | altero_2_8  | CTCACTTGGGCTCTTTTGGCCG       |
| bacilli_9              | ACTAGTCCCGAAGGAGAAGCCCT     | plastid_4_9     | GCCTTAAAGCCGCTCCGAATGG      | altero_2_9  | ACTTGGGCTCTTTTGGCCG          |
| bacilli_10             | CCCTGAGCCGCTTTCATTTGCAAC    | plastid_4_10    | CACCTACCTTAAAGCCGCTCCG      | altero_2_10 | CTACGACATTTTAAAGGGTCCG       |
| bacilli_11             | CGTCCGCTCAACTTCAATGAGGCA    | plastid_4_11    | CCTACCTTAAAGCCGCTCCG        | altero_2_11 | CCGACCTGACATTTTAAAGGGTCCG    |
| bacilli_12             | GTCCGCGCTCAACTTCAATGAGGCA   | plastid_4_12    | CTACCTTAAAGCCGCTCCG         | altero_2_12 | ATCTACTTGGGCTCTTTTGGCC       |
| bacilli_13             | CCGCGCTCAACTTCAATGAGGCA     | plastid_4_13    | CTAGCCCTACCTTAAAGCCGCTCC    | altero_2_13 | CCCTCGAAAGGCAAGTTTCCCAAG     |
| bacilli_14             | AGCCGAGCCGCTTTCATTTGCAAC    | plastid_4_14    | ACTAGCCCTACCTTAAAGCCGCTCC   | altero_2_14 | ACATTTTAAAGGGTCCGCTCCAC      |
| bacilli_15             | CTCCCGAAGGAGAAGCCCTATCT     | plastid_4_15    | AAGCCGCTCCGCTCCGAATGGT      | altero_2_15 | TGGGCTCTCTTTTGGCCG           |
| bacilli_16             | CAGCCGAGCCGCTTTCATTTGCAAC   | plastid_4_16    | CACCTAGCCCTACCTTAAAGCCGCTCC | altero_2_16 | TCCTCCCTCGAAAGGCAAGTTTCCCAAG |
| bacilli_17             | CTGTCACTGTCTCCCGAAGGAGAAG   | plastid_4_17    | GGCCGCTCCGCTCCGAATGGT       | altero_2_17 | CTCTCGAAAGGCAAGTTTCCCAAG     |
| bacilli_18             | CGCAGCCGCTTTCATTTGCAAC      | plastid_4_18    | GCCGCTCCGCTCCGAATGGT        | altero_2_18 | GGGCTCCGCTCCACACTGCTTCC      |
| bacilli_19             | CCGTCGCGCTTTCATTTGCAAC      | plastid_4_19    | GCCGCTCCGCTCCGAATGGT        | altero_2_19 | ACGACATTTTAAAGGGTCCGCTCC     |
| bacilli_20             | CCGTCGCGCTTTCATTTGCAAC      | plastid_4_20    | AGCCGCTCCGCTCCGAATGGT       | altero_2_20 | CATTTTAAAGGGTCCGCTCCAC       |

|               |                            |              |                            |             |                                   |
|---------------|----------------------------|--------------|----------------------------|-------------|-----------------------------------|
| bacilli_21    | CGCCGCTAATCTCATAAAGAGCAAC  | plastid_4_21 | ACGAGATAGCTAGCCTTCGAGGT    | altero_2_21 | GACATCTTAAAGGGGTCGGCTCA           |
| bacilli_22    | CCGAAGGAGAACGCCCTATCTCTAG  | plastid_4_22 | CGCCCTCGAATGGTTAGGCTAAC    | altero_2_22 | AATCTCACTTGGGCTCTCTTTGGC          |
| bacilli_23    | CGAAGGAGAACGCCCTATCTCTAGG  | plastid_4_23 | CGCCCTCGAATGGTTAGGCTAAC    | altero_2_23 | AAAGGGGTCGGCTCCACATCACTGT         |
| bacilli_24    | CGAAGGAGAACGCCCTATCTCTAGG  | plastid_4_24 | GCCTCCGAATGGTTAGGCTAACGA   | altero_2_24 | TATCCGCTTAAAGGCAAGTTCCT           |
| bacilli_25    | GTGACTCTGTCCCGAAGGAGAAAG   | plastid_4_25 | CTACTAGCCTACCTTAAGCGCCG    | altero_2_25 | GGTCCGCTCCACATCACTGTCTCC          |
| crenarch_1_1  | AGCCTGTACGTTGAGCGTACAGATT  | plastid_5_1  | CTTACGCCCTACCATCTAAGGCT    | colwel_1_1  | GGCCCACTACAGGTCAAGTCCAG           |
| crenarch_1_2  | CCTGTACGTTGAGCGTACAGATT    | plastid_5_2  | GAGCTGCTCCAAATGGTTAGAC     | colwel_1_2  | CTGGCCCACTACAGGTCAAGTCCAG         |
| crenarch_1_3  | GCCTGTACGTTGAGCGTACAGATT   | plastid_5_3  | CCTTAGCGGTGCTCCAAATGGT     | colwel_1_3  | GTGCGCCACTACAGGTCAAGTCCAG         |
| crenarch_1_4  | GAGCGTACAGATTAAACCGAAACT   | plastid_5_4  | CCCTTAGCCCTACCATCTCAAGCC   | colwel_1_4  | TAGTGGCCACTACAGGTCAAGTCCAG        |
| crenarch_1_5  | TGAGCGTACAGATTAAACCGAAACT  | plastid_5_5  | CCCTTAGCCCTACCATCTCAAGCC   | colwel_1_5  | GTATGGCTCCGCTACAGGTCAAGTCCAG      |
| crenarch_1_6  | CAGCCTGTACGTTGAGCGTACAGATT | plastid_5_6  | GCTAGTCTCCGGAATTTGGCGACT   | colwel_1_6  | CGTLAGCTGGCCACTACAGGTCAAGTCCAG    |
| crenarch_1_7  | CTTGTACGAACTCAAGTTCGATA    | plastid_5_7  | CCTCTCGGCATATGGGGATTTAGCT  | colwel_1_7  | GTGCGTTAGCTGGCCACTACAGGTCAAGTCCAG |
| crenarch_1_8  | CTTGTACGAACTCAAGTTCGATA    | plastid_5_8  | GACTAAGCGTGTGGGTATGACCAAG  | colwel_1_8  | TGGGTTAGCTGGCCACTACAGGTCAAGTCCAG  |
| crenarch_1_9  | CTGTACGTTGAGCGTACAGATT     | plastid_5_9  | ACTAACCGTGTGGGTATGACCAAG   | colwel_1_9  | TTAGCTGGCCACTACAGGTCAAGTCCAG      |
| crenarch_1_10 | CTGTACGTTGAGCGTACAGATT     | plastid_5_10 | CCAAAGGTTATCCCTCTAAGGG     | colwel_1_10 | GCCTTAGCTGGCCACTACAGGTCAAGTCCAG   |
| crenarch_1_11 | CTGTACGTTGAGCGTACAGATT     | plastid_5_11 | CTCTCGGCATATGGGGATTTAGCT   | colwel_1_11 | AGCTGGCCACTACAGGTCAAGTCCAG        |
| crenarch_1_12 | CTGTACGTTGAGCGTACAGATT     | plastid_5_12 | GCCTGAGCTCATCTTACGAGTGT    | colwel_1_12 | GCCTGATTTGCTCCCTGTACTGT           |
| crenarch_1_13 | CTGTACGTTGAGCGTACAGATT     | plastid_5_13 | CCTGAGCTCATCTTACGAGTGT     | colwel_1_13 | CGCGGATTTGCTCCCTGTACTGT           |
| crenarch_1_14 | CTGTACGTTGAGCGTACAGATT     | plastid_5_14 | GCGGAGCTCATCTTACGAGTGT     | colwel_1_14 | GGATCAAGTCCAGCAAGGTCAAGTCCAG      |
| crenarch_1_15 | CTGTACGTTGAGCGTACAGATT     | plastid_5_15 | CACTCTCGGCATATGGGGATTTAG   | colwel_1_15 | CGGATCAAGTCCAGCAAGGTCAAGTCCAG     |
| crenarch_1_16 | CTGTACGTTGAGCGTACAGATT     | plastid_5_16 | ACTCTCGGCATATGGGGATTTAG    | colwel_1_16 | CGGATCAAGTCCAGCAAGGTCAAGTCCAG     |
| crenarch_1_17 | CTGTACGTTGAGCGTACAGATT     | plastid_5_17 | CGAGCTACAATCGAACTTGGACA    | colwel_1_17 | CGGATCAAGTCCAGCAAGGTCAAGTCCAG     |
| crenarch_1_18 | CTGTACGTTGAGCGTACAGATT     | plastid_5_18 | GGCCGAGCTCATCTTACGAGTGT    | colwel_1_18 | CAGGATCAAGTCCAGCAAGGTCAAGTCCAG    |
| crenarch_1_19 | CTGTACGTTGAGCGTACAGATT     | plastid_5_19 | CGCGAGTCTCTACAGATTTCCAA    | colwel_1_19 | CGCCACTACAGGTCAAGTCCAGCAAG        |
| crenarch_1_20 | CTGTACGTTGAGCGTACAGATT     | plastid_5_20 | ATCCAGCGGAGTCTCTAGAGATCCC  | colwel_1_20 | GCACACTACAGGTCAAGTCCAGCAAG        |
| crenarch_1_21 | CTGTACGTTGAGCGTACAGATT     | plastid_5_21 | CACCGGAGTCTCTAGAGATCCC     | colwel_1_21 | GCACACTACAGGTCAAGTCCAGCAAG        |
| crenarch_1_22 | CTGTACGTTGAGCGTACAGATT     | plastid_5_22 | ACCGGAGTCTCTAGAGATCCC      | colwel_1_22 | GATCAAGTCCAGCAAGGTCAAGTCCAG       |
| crenarch_1_23 | CTGTACGTTGAGCGTACAGATT     | plastid_5_23 | CTGGAGTCTCTAGAGATCCC       | colwel_1_23 | ACTACAGGTCAAGTCCAGCAAGGT          |
| crenarch_1_24 | CTGTACGTTGAGCGTACAGATT     | plastid_5_24 | TTGCCCTCTAGTTCAGTAAATGGC   | colwel_1_24 | CGCCACTACAGGTCAAGTCCAGCAAG        |
| crenarch_1_25 | CTGTACGTTGAGCGTACAGATT     | plastid_5_25 | TGCCCTCTAGTTCAGTAAATGGC    | colwel_1_25 | CTACAGGTCAAGTCCAGCAAGGT           |
| acido_1_1     | TCGACGACTCTCTGGAGTCCCGC    | margrpa_1_1  | CGCCGCTACCGAAGGGGTGCAAT    | altero_3_1  | CAACTGTTGTCGCGCTTTGGCA            |
| acido_1_2     | CGCCGACTCCCGCAAAAGTCCCGC   | margrpa_1_2  | AGCTCCGCTACCGAAGGGGTGCAAT  | altero_3_2  | AACCTGTTGTCGCGCTTTGGCA            |
| acido_1_3     | CACTGAGCACTCTCTGGAGTCC     | margrpa_1_3  | CGCCGCTACCGAAGGGGTGCAAT    | altero_3_3  | CGCCGCTTTGGCATATTTCCAA            |
| acido_1_4     | CATGACGCACTCTCTGGAGTCC     | margrpa_1_4  | CGCCGCTACCGAAGGGGTGCAAT    | altero_3_4  | CGCCGCTTTGGCATATTTCCAA            |
| acido_1_5     | CGCCGCGAGTCCCGCAAAAGTCCCGC | margrpa_1_5  | CGCCGCTACCGAAGGGGTGCAAT    | altero_3_5  | CGCCGCTTTGGCATATTTCCAA            |
| acido_1_6     | ATGACGCACTCTCTGGAGTCCCGC   | margrpa_1_6  | CGCCGCTACCGAAGGGGTGCAAT    | altero_3_6  | CGCCGCTTTGGCATATTTCCAA            |
| acido_1_7     | CGCCGCGAGTCCCGCAAAAGTCCCGC | margrpa_1_7  | CGCCGCTACCGAAGGGGTGCAAT    | altero_3_7  | CGCCGCTTTGGCATATTTCCAA            |
| acido_1_8     | CGCCGCGAGTCCCGCAAAAGTCCCGC | margrpa_1_8  | CGCCGCTACCGAAGGGGTGCAAT    | altero_3_8  | CGCCGCTTTGGCATATTTCCAA            |
| acido_1_9     | CGCCGCGAGTCCCGCAAAAGTCCCGC | margrpa_1_9  | CGCCGCTACCGAAGGGGTGCAAT    | altero_3_9  | CGCCGCTTTGGCATATTTCCAA            |
| acido_1_10    | CGCCGCGAGTCCCGCAAAAGTCCCGC | margrpa_1_10 | CGCCGCTACCGAAGGGGTGCAAT    | altero_3_10 | CGCCGCTTTGGCATATTTCCAA            |
| acido_1_11    | CGCCGCGAGTCCCGCAAAAGTCCCGC | margrpa_1_11 | CGCCGCTACCGAAGGGGTGCAAT    | altero_3_11 | CGCCGCTTTGGCATATTTCCAA            |
| acido_1_12    | CGCCGCGAGTCCCGCAAAAGTCCCGC | margrpa_1_12 | CGCCGCTACCGAAGGGGTGCAAT    | altero_3_12 | CGCCGCTTTGGCATATTTCCAA            |
| acido_1_13    | CGCCGCGAGTCCCGCAAAAGTCCCGC | margrpa_1_13 | CGCCGCTACCGAAGGGGTGCAAT    | altero_3_13 | CGCCGCTTTGGCATATTTCCAA            |
| acido_1_14    | CGCCGCGAGTCCCGCAAAAGTCCCGC | margrpa_1_14 | CGCCGCTACCGAAGGGGTGCAAT    | altero_3_14 | CGCCGCTTTGGCATATTTCCAA            |
| acido_1_15    | CGCCGCGAGTCCCGCAAAAGTCCCGC | margrpa_1_15 | CGCCGCTACCGAAGGGGTGCAAT    | altero_3_15 | CGCCGCTTTGGCATATTTCCAA            |
| acido_1_16    | CGCCGCGAGTCCCGCAAAAGTCCCGC | margrpa_1_16 | CGCCGCTACCGAAGGGGTGCAAT    | altero_3_16 | CGCCGCTTTGGCATATTTCCAA            |
| acido_1_17    | CGCCGCGAGTCCCGCAAAAGTCCCGC | margrpa_1_17 | CGCCGCTACCGAAGGGGTGCAAT    | altero_3_17 | CGCCGCTTTGGCATATTTCCAA            |
| acido_1_18    | CGCCGCGAGTCCCGCAAAAGTCCCGC | margrpa_1_18 | CGCCGCTACCGAAGGGGTGCAAT    | altero_3_18 | CGCCGCTTTGGCATATTTCCAA            |
| acido_1_19    | CGCCGCGAGTCCCGCAAAAGTCCCGC | margrpa_1_19 | CGCCGCTACCGAAGGGGTGCAAT    | altero_3_19 | CGCCGCTTTGGCATATTTCCAA            |
| acido_1_20    | CGCCGCGAGTCCCGCAAAAGTCCCGC | margrpa_1_20 | CGCCGCTACCGAAGGGGTGCAAT    | altero_3_20 | CGCCGCTTTGGCATATTTCCAA            |
| acido_1_21    | CGCCGCGAGTCCCGCAAAAGTCCCGC | margrpa_1_21 | CGCCGCTACCGAAGGGGTGCAAT    | altero_3_21 | CGCCGCTTTGGCATATTTCCAA            |
| acido_1_22    | CGCCGCGAGTCCCGCAAAAGTCCCGC | margrpa_1_22 | CGCCGCTACCGAAGGGGTGCAAT    | altero_3_22 | CGCCGCTTTGGCATATTTCCAA            |
| acido_1_23    | CGCCGCGAGTCCCGCAAAAGTCCCGC | margrpa_1_23 | CGCCGCTACCGAAGGGGTGCAAT    | altero_3_23 | CGCCGCTTTGGCATATTTCCAA            |
| acido_1_24    | CGCCGCGAGTCCCGCAAAAGTCCCGC | margrpa_1_24 | CGCCGCTACCGAAGGGGTGCAAT    | altero_3_24 | CGCCGCTTTGGCATATTTCCAA            |
| acido_1_25    | CGCCGCGAGTCCCGCAAAAGTCCCGC | margrpa_1_25 | CGCCGCTACCGAAGGGGTGCAAT    | altero_3_25 | CGCCGCTTTGGCATATTTCCAA            |
| acido_2_1     | GTCAAACTCCCTCCACCAAGTGT    | margrpa_2_1  | GGTCCCTTCGATTTGACTTTCTC    | gamma_1_1   | GTAAAAGGCTCAAGCTCCCAACGGC         |
| acido_2_2     | GGTCAACTCCCTCCACCAAGTGT    | margrpa_2_2  | GGTCCCTTCGATTTGACTTTCTC    | gamma_1_2   | GTAAAAGGCTCAAGCTCCCAACGGC         |
| acido_2_3     | GGTCAACTCCCTCCACCAAGTGT    | margrpa_2_3  | GGTCCCTTCGATTTGACTTTCTC    | gamma_1_3   | GTAAAAGGCTCAAGCTCCCAACGGC         |
| acido_2_4     | GGTCAACTCCCTCCACCAAGTGT    | margrpa_2_4  | GGTCCCTTCGATTTGACTTTCTC    | gamma_1_4   | GTAAAAGGCTCAAGCTCCCAACGGC         |
| acido_2_5     | GGTCAACTCCCTCCACCAAGTGT    | margrpa_2_5  | GGTCCCTTCGATTTGACTTTCTC    | gamma_1_5   | GTAAAAGGCTCAAGCTCCCAACGGC         |
| acido_2_6     | GGTCAACTCCCTCCACCAAGTGT    | margrpa_2_6  | GGTCCCTTCGATTTGACTTTCTC    | gamma_1_6   | GTAAAAGGCTCAAGCTCCCAACGGC         |
| acido_2_7     | GGTCAACTCCCTCCACCAAGTGT    | margrpa_2_7  | GGTCCCTTCGATTTGACTTTCTC    | gamma_1_7   | GTAAAAGGCTCAAGCTCCCAACGGC         |
| acido_2_8     | GGTCAACTCCCTCCACCAAGTGT    | margrpa_2_8  | GGTCCCTTCGATTTGACTTTCTC    | gamma_1_8   | GTAAAAGGCTCAAGCTCCCAACGGC         |
| acido_2_9     | GGTCAACTCCCTCCACCAAGTGT    | margrpa_2_9  | GGTCCCTTCGATTTGACTTTCTC    | gamma_1_9   | GTAAAAGGCTCAAGCTCCCAACGGC         |
| acido_2_10    | GGTCAACTCCCTCCACCAAGTGT    | margrpa_2_10 | GGTCCCTTCGATTTGACTTTCTC    | gamma_1_10  | GTAAAAGGCTCAAGCTCCCAACGGC         |
| acido_2_11    | GGTCAACTCCCTCCACCAAGTGT    | margrpa_2_11 | GGTCCCTTCGATTTGACTTTCTC    | gamma_1_11  | GTAAAAGGCTCAAGCTCCCAACGGC         |
| acido_2_12    | GGTCAACTCCCTCCACCAAGTGT    | margrpa_2_12 | GGTCCCTTCGATTTGACTTTCTC    | gamma_1_12  | GTAAAAGGCTCAAGCTCCCAACGGC         |
| acido_2_13    | GGTCAACTCCCTCCACCAAGTGT    | margrpa_2_13 | GGTCCCTTCGATTTGACTTTCTC    | gamma_1_13  | GTAAAAGGCTCAAGCTCCCAACGGC         |
| acido_2_14    | GGTCAACTCCCTCCACCAAGTGT    | margrpa_2_14 | GGTCCCTTCGATTTGACTTTCTC    | gamma_1_14  | GTAAAAGGCTCAAGCTCCCAACGGC         |
| acido_2_15    | GGTCAACTCCCTCCACCAAGTGT    | margrpa_2_15 | GGTCCCTTCGATTTGACTTTCTC    | gamma_1_15  | GTAAAAGGCTCAAGCTCCCAACGGC         |
| acido_2_16    | GGTCAACTCCCTCCACCAAGTGT    | margrpa_2_16 | GGTCCCTTCGATTTGACTTTCTC    | gamma_1_16  | GTAAAAGGCTCAAGCTCCCAACGGC         |
| acido_2_17    | GGTCAACTCCCTCCACCAAGTGT    | margrpa_2_17 | GGTCCCTTCGATTTGACTTTCTC    | gamma_1_17  | GTAAAAGGCTCAAGCTCCCAACGGC         |
| acido_2_18    | GGTCAACTCCCTCCACCAAGTGT    | margrpa_2_18 | GGTCCCTTCGATTTGACTTTCTC    | gamma_1_18  | GTAAAAGGCTCAAGCTCCCAACGGC         |
| acido_2_19    | GGTCAACTCCCTCCACCAAGTGT    | margrpa_2_19 | GGTCCCTTCGATTTGACTTTCTC    | gamma_1_19  | GTAAAAGGCTCAAGCTCCCAACGGC         |
| acido_2_20    | GGTCAACTCCCTCCACCAAGTGT    | margrpa_2_20 | GGTCCCTTCGATTTGACTTTCTC    | gamma_1_20  | GTAAAAGGCTCAAGCTCCCAACGGC         |
| acido_2_21    | GGTCAACTCCCTCCACCAAGTGT    | margrpa_2_21 | GGTCCCTTCGATTTGACTTTCTC    | gamma_1_21  | GTAAAAGGCTCAAGCTCCCAACGGC         |
| acido_2_22    | GGTCAACTCCCTCCACCAAGTGT    | margrpa_2_22 | GGTCCCTTCGATTTGACTTTCTC    | gamma_1_22  | GTAAAAGGCTCAAGCTCCCAACGGC         |
| acido_2_23    | GGTCAACTCCCTCCACCAAGTGT    | margrpa_2_23 | GGTCCCTTCGATTTGACTTTCTC    | gamma_1_23  | GTAAAAGGCTCAAGCTCCCAACGGC         |
| acido_2_24    | GGTCAACTCCCTCCACCAAGTGT    | margrpa_2_24 | GGTCCCTTCGATTTGACTTTCTC    | gamma_1_24  | GTAAAAGGCTCAAGCTCCCAACGGC         |
| acido_2_25    | GGTCAACTCCCTCCACCAAGTGT    | margrpa_2_25 | GGTCCCTTCGATTTGACTTTCTC    | gamma_1_25  | GTAAAAGGCTCAAGCTCCCAACGGC         |
| acido_3_1     | CGAGTCCCGGATTCGCGGAT       | OPI0_1_1     | CGCCGCTACCGGAGTTCGCTAAG    | gamma_2_1   | TACTGTGATGCAACCGGATAGGG           |
| acido_3_2     | CGAGTCCCGGATTCGCGGAT       | OPI0_1_2     | CGCCGCTACCGGAGTTCGCTAAG    | gamma_2_2   | CAGCATACCTGTGCAACCGGATAGGG        |
| acido_3_3     | CGAGTCCCGGATTCGCGGAT       | OPI0_1_3     | CGCCGCTACCGGAGTTCGCTAAG    | gamma_2_3   | TACTGTGATGCAACCGGATAGGG           |
| acido_3_4     | CGAGTCCCGGATTCGCGGAT       | OPI0_1_4     | CGCCGCTACCGGAGTTCGCTAAG    | gamma_2_4   | CAGCATACCTGTGCAACCGGATAGGG        |
| acido_3_5     | CGAGTCCCGGATTCGCGGAT       | OPI0_1_5     | CGCCGCTACCGGAGTTCGCTAAG    | gamma_2_5   | TACTGTGATGCAACCGGATAGGG           |
| acido_3_6     | CGAGTCCCGGATTCGCGGAT       | OPI0_1_6     | CGCCGCTACCGGAGTTCGCTAAG    | gamma_2_6   | CAGCATACCTGTGCAACCGGATAGGG        |
| acido_3_7     | CGAGTCCCGGATTCGCGGAT       | OPI0_1_7     | CGCCGCTACCGGAGTTCGCTAAG    | gamma_2_7   | TACTGTGATGCAACCGGATAGGG           |
| acido_3_8     | CGAGTCCCGGATTCGCGGAT       | OPI0_1_8     | CGCCGCTACCGGAGTTCGCTAAG    | gamma_2_8   | CAGCATACCTGTGCAACCGGATAGGG        |
| acido_3_9     | CGAGTCCCGGATTCGCGGAT       | OPI0_1_9     | CGCCGCTACCGGAGTTCGCTAAG    | gamma_2_9   | TACTGTGATGCAACCGGATAGGG           |
| acido_3_10    | CGAGTCCCGGATTCGCGGAT       | OPI0_1_10    | CGCCGCTACCGGAGTTCGCTAAG    | gamma_2_10  | CAGCATACCTGTGCAACCGGATAGGG        |
| acido_3_11    | CGAGTCCCGGATTCGCGGAT       | OPI0_1_11    | CGCCGCTACCGGAGTTCGCTAAG    | gamma_2_11  | TACTGTGATGCAACCGGATAGGG           |
| acido_3_12    | CGAGTCCCGGATTCGCGGAT       | OPI0_1_12    | CGCCGCTACCGGAGTTCGCTAAG    | gamma_2_12  | CAGCATACCTGTGCAACCGGATAGGG        |
| acido_3_13    | CGAGTCCCGGATTCGCGGAT       | OPI0_1_13    | CGCCGCTACCGGAGTTCGCTAAG    | gamma_2_13  | TACTGTGATGCAACCGGATAGGG           |
| acido_3_14    | CGAGTCCCGGATTCGCGGAT       | OPI0_1_14    | CGCCGCTACCGGAGTTCGCTAAG    | gamma_2_14  | CAGCATACCTGTGCAACCGGATAGGG        |
| acido_3_15    | CGAGTCCCGGATTCGCGGAT       | OPI0_1_15    | CGCCGCTACCGGAGTTCGCTAAG    | gamma_2_15  | TACTGTGATGCAACCGGATAGGG           |
| acido_3_16    | CGAGTCCCGGATTCGCGGAT       | OPI0_1_16    | CGCCGCTACCGGAGTTCGCTAAG    | gamma_2_16  | CAGCATACCTGTGCAACCGGATAGGG        |
| acido_3_17    | CGAGTCCCGGATTCGCGGAT       | OPI0_1_17    | CGCCGCTACCGGAGTTCGCTAAG    | gamma_2_17  | TACTGTGATGCAACCGGATAGGG           |
| acido_3_18    | CGAGTCCCGGATTCGCGGAT       | OPI0_1_18    | CGCCGCTACCGGAGTTCGCTAAG    | gamma_2_18  | CAGCATACCTGTGCAACCGGATAGGG        |
| acido_3_19    | CGAGTCCCGGATTCGCGGAT       | OPI0_1_19    | CGCCGCTACCGGAGTTCGCTAAG    | gamma_2_19  | TACTGTGATGCAACCGGATAGGG           |
| acido_3_20    | CGAGTCCCGGATTCGCGGAT       | OPI0_1_20    | CGCCGCTACCGGAGTTCGCTAAG    | gamma_2_20  | CAGCATACCTGTGCAACCGGATAGGG        |
| acido_3_21    | CGAGTCCCGGATTCGCGGAT       | OPI0_1_21    | CGCCGCTACCGGAGTTCGCTAAG    | gamma_2_21  | TACTGTGATGCAACCGGATAGGG           |
| acido_3_22    | CGAGTCCCGGATTCGCGGAT       | OPI0_1_22    | CGCCGCTACCGGAGTTCGCTAAG    | gamma_2_22  | CAGCATACCTGTGCAACCGGATAGGG        |
| acido_3_23    | CGAGTCCCGGATTCGCGGAT       | OPI0_1_23    | CGCCGCTACCGGAGTTCGCTAAG    | gamma_2_23  | TACTGTGATGCAACCGGATAGGG           |
| acido_3_24    | CGAGTCCCGGATTCGCGGAT       | OPI0_1_24    | CGCCGCTACCGGAGTTCGCTAAG    | gamma_2_24  | CAGCATACCTGTGCAACCGGATAGGG        |
| acido_3_25    | CGAGTCCCGGATTCGCGGAT       | OPI0_1_25    | CGCCGCTACCGGAGTTCGCTAAG    | gamma_2_25  | TACTGTGATGCAACCGGATAGGG           |
| actino_1_1    | AACCTAGTACCGTCAATCCACAGC   | OP3_1_1      | ATCCAAAGGTTGATAGGTCCTTACGG | gamma_3_1   | TGCGAACCGAAGGGCAACCGCC            |
| actino_1_2    | AACCTAGTACCGTCAATCCACAGC   | OP3_1_2      | TCCAAGGTTGATAGGTCCTTACGG   | gamma_3_2   | CTGCGAACCGAAGGGCAACCGCC           |
| actino_1_3    | AACCTAGTACCGTCAATCCACAGC   | OP3_1_3      | CAAGGTTGATAGGTCCTTACGG     | gamma_3_3   | GACTGCTCCGAGTTCGACCAAGGG          |
| actino_1_4    | AACCTAGTACCGTCAATCCACAGC   | OP3_1_4      | TGTTCTCCCTCTGCTGACAGGATT   | gamma_3_4   | TAAACCGGCTAGCTGCGACCAAGGG         |
| actino_1_5    | AACCTAGTACCGTCAATCCACAGC   | OP3_1_5      | TGTTCTCCCTCTGCTGACAGGATT   | gamma_3_5   | TAAACCGGCTAGCTGCGACCAAGGG         |
| actino_1_6    | AACCTAGTACCGTCAATCCACAGC   | OP3_1_6      | CTTGTCTCCCTCTGCTGACAGGATT  | gamma_3_6   | TAAACCGGCTAGCTGCGACCAAGGG         |
| actino_1_7    | AACCTAGTACCGTCAATCCACAGC   | OP3_1_7      | GTTCTCCCTCTGCTGACAGGATT    | gamma_3_7   | TTACTAACCGCAACCGCGCTTT            |

|             |                            |              |                           |            |                              |
|-------------|----------------------------|--------------|---------------------------|------------|------------------------------|
| actino_1_8  | AACTAGATCCGCTATCCACACCGC   | OP3_1_8      | TCATCAAGGTTGATAGGTCCTTACG | gamma_3_8  | ACGGCTAGCTGGACACCGAAGGG      |
| actino_1_9  | TGCCACACCTGTATAGGGCGCTAAT  | OP3_1_9      | TGCACAGGTTATCCCGAACCTTAGG | gamma_3_9  | TTCACCGGTAGCTGGCAGCCCGAA     |
| actino_1_10 | GGCCCTGAACCTTACGACCGGACTT  | OP3_1_10     | TTGCACAGGTTATCCCGAACCTTAG | gamma_3_10 | CGCGTAGCTGGCAGACCGAAGGGC     |
| actino_1_11 | AGCCTGAACTTTCACCGGACTTTG   | OP3_1_11     | TTCCCTCTGCTGCACAGGATTTTAC | gamma_3_11 | TACTTAACCGCCACCGACCGGCTT     |
| actino_1_12 | GAGCCCTGAACTTTCACCGGACTT   | OP3_1_12     | CCATCAAGGTTGATAGGTCCTTAC  | gamma_3_12 | AGCTGGCAGCCGAAAGGGCAACCC     |
| actino_1_13 | AGGCTCGATAGCGGCCAGTGAGCT   | OP3_1_13     | GCATAGGTCCTTACGGATCCCATC  | gamma_3_13 | CTTACTTAACCGCCACCGGCTTAC     |
| actino_1_14 | CGCTCGATAGCGGCCAGTGAGCTG   | OP3_1_14     | TCCTCCCTGCTGCACAGGATTTACA | gamma_3_14 | ATCCGACTTACTTAACCGCCAACCG    |
| actino_1_15 | CGTGCATAGCGGCCAGTGAGCTG    | OP3_1_15     | CGATGCCCATTTTCCCTCATGTT   | gamma_3_15 | CGACTTACTTAACCGCCAACCGGG     |
| actino_1_16 | CACGCTCGATAGCGGCCAGTGAGCTG | OP3_1_16     | TCCTTCCGGGTTAGGCAACCTACTT | gamma_3_16 | TCGGACTTACTTAACCGCCAACCGG    |
| actino_1_17 | CCCTGAATTTACACACCGGACTTGT  | OP3_1_17     | AGTGGCACCGACCGAAAGTCGGTGT | gamma_3_17 | CTTAAACGGCTAGCTGGCAGCCGA     |
| actino_1_18 | TGAGCCCTGAACCTTTCACGACCGAC | OP3_1_18     | CCAGTAATGGCCCTTCGGGACTGGT | gamma_3_18 | ACTTACTTAACCGCCAACCGGCGCT    |
| actino_1_19 | ACCTAGATCCGTCATCCACACCGG   | OP3_1_19     | AGAGTGGCACCGACCGCAAGTCGGT | gamma_3_19 | GCCTAGCTGGCAGCCAGCAAGGGGA    |
| actino_1_20 | CTTCGGGCTATCCAGTAACTAAGGT  | OP3_1_20     | TCGAAAAGCAGGACGACTATCCGGT | gamma_3_20 | CCGACTTACTTAACCGCCAACCGGCT   |
| actino_1_21 | CTCTGGGCTATCCAGTAACTAAGG   | OP3_1_21     | CTGTGCTTCGAAAAGCAGGACGCT  | gamma_3_21 | ACTTAACCGCCAACCGGCGCTTAC     |
| actino_1_22 | TCGATAGCGGCCAGTGAGCTGCTT   | OP3_1_22     | CTTLAGTGGCCGACCGCAAGGACT  | gamma_3_22 | CATCCGACTTACTTAACCGCCAACG    |
| actino_1_23 | TCGATAGCGGCCAGTGAGCTGCTT   | OP3_1_23     | CCCTTCCTTGGCCGTTAGGCAACT  | gamma_3_23 | TCCTCACACCGGGACTTGTCTAGA     |
| actino_1_24 | GCATAGCGGCCAGTGAGCTGCTT    | OP3_1_24     | GCCTTGGCGGTTAGGCAACTACT   | gamma_3_24 | AGAACTTAACCGCCAGCTGGCACA     |
| actino_1_25 | TCCTGGGCTATCCAGTAACTAAG    | OP3_1_25     | CAGTAATGGCCCTTCGGGACTGGT  | gamma_3_25 | ACTTAACCGCTAGCTGGCAGCCG      |
| actino_2_1  | CCGGTTTCCCAAGTGAAGCACTT    | OP9_1_1      | GGGCAAGATAATGTCAGTCCCGGT  | gamma_4_1  | ACACGAAAGGCAAAACCTCCCGAC     |
| actino_2_2  | CAAGCACTTGGTGTCCCTCGACT    | OP9_1_2      | GTGGGCACATAATAGCCGGAGCTT  | gamma_4_2  | GACCCGAAAGGCAAACTCCCGGCA     |
| actino_2_3  | CCGGGTTTCCCAAGTGAAGCACT    | OP9_1_3      | TGCTGGCACAATAATAGCCGGAGCT | gamma_4_3  | CACCGAAAGGCAAACTCCCGGCA      |
| actino_2_4  | GCTTGCACACGAAATCGTGAAGCTG  | OP9_1_4      | CCCACTTACAGGGTAGATTACCCAC | gamma_4_4  | ACCGAAAGGCAAACTCCCGGCACT     |
| actino_2_5  | TTCCGGGTTTCCCAAGTGAAGCA    | OP9_1_5      | CCCACTTACAGGGTAGATTACCCAC | gamma_4_5  | CGACACCGAAAGGCAAACTCCCGC     |
| actino_2_6  | CGACACGAAATCGTGAAGCTGATCC  | OP9_1_6      | CCCACTTACAGGGTAGATTACCCAC | gamma_4_6  | CGAAAGGCAAACTCCCGGCACTC      |
| actino_2_7  | GACACGAAATCGTGAAGCTGATCC   | OP9_1_7      | CTGTAACTCATATCCCGGAAGGA   | gamma_4_7  | CGCAGCCGAAAGGCAAACTCCCGC     |
| actino_2_8  | ACACGAAATCGTGAAGCTGATCC    | OP9_1_8      | CTGTAACTCATATCCCGGAAGGA   | gamma_4_8  | CGAAAGGCAAACTCCCGGCACTC      |
| actino_2_9  | CCGGGTTTCCCAAGTGAAGCA      | OP9_1_9      | CTGTAACTCATATCCCGGAAGGA   | gamma_4_9  | GCTGGCAGCCGAAAGGCAAACTCC     |
| actino_2_10 | ACGAAATCGTGAAGCTGATCC      | OP9_1_10     | CCACTTACAGGGTAGATTACCCAC  | gamma_4_10 | AGCTGGCAGCCGAAAGGCAAACTCC    |
| actino_2_11 | TCGGGTTTCCCAAGTGAAGCA      | OP9_1_11     | GACGGGCAAGATAATGCAAGTCCC  | gamma_4_11 | TTGGTAGCCATTGCTGGTTTGCAG     |
| actino_2_12 | CCGAAATCGTGAAGCTGATCC      | OP9_1_12     | TCGGGTTTCCCAAGTGAAGCA     | gamma_4_12 | TTGGTAGCCATTGCTGGTTTGCAG     |
| actino_2_13 | CCGTTTCCCAAGTGAAGCA        | OP9_1_13     | CCGTTTCCCAAGTGAAGCA       | gamma_4_13 | GGATTGGTAGCCATTGCTGGTTTGC    |
| actino_2_14 | AAGTGAAGCTGATGCTGCTCT      | OP9_1_14     | GGTGTGGCACAATAATAGCCGGAG  | gamma_4_14 | GATTGGTAGCCATTGCTGGTTTGC     |
| actino_2_15 | TTTCGGGTTTCCCAAGTGAAG      | OP9_1_15     | GGTGTGGCACAATAATAGCCGGAG  | gamma_4_15 | GGGATTGGTAGCCATTGCTGGTTTGC   |
| actino_2_16 | CGGAAATCGTGAAGCTGATCC      | OP9_1_16     | CACCTTACAGGGTAGATTACCCACG | gamma_4_16 | GGGATTGGTAGCCATTGCTGGTTTGC   |
| actino_2_17 | GCAAGCACTTGGTTCGCTCCGAC    | OP9_1_17     | GGCAGTCTGCTAGAGTGCACTTGT  | gamma_4_17 | GGGATTGGTAGCCATTGCTGGTTTGC   |
| actino_2_18 | TTTCGGGTTTCCCAAGTGAAG      | OP9_1_18     | GGTGTGGCACAATAATAGCCGGAG  | gamma_4_18 | GGGATTGGTAGCCATTGCTGGTTTGC   |
| actino_2_19 | AAGCACTTGGTTCGCTCCGACTT    | OP9_1_19     | GAGGGTTATCCCGCACTTACAGGGT | gamma_4_19 | TGGGACACCGAAAGGCAAACTCCCG    |
| actino_2_20 | GCTTGGGTTTCCCAAGTGAAG      | OP9_1_20     | GTCAGAGATAGACCAAAAGCCGGC  | gamma_4_20 | AGGGATTGGTAGCCATTGCTGGTT     |
| actino_2_21 | AGTGAAGCACTTGGTTCGCTCTC    | OP9_1_21     | GGGGTACCGTACAGGCTTACAGGGT | gamma_4_21 | TAAGGGATTGGTAGCCATTGCTGGT    |
| actino_2_22 | CAAGTGAAGCACTTGGTTCGCTCTC  | OP9_1_22     | GGGGTACCGTACAGGCTTACAGGGT | gamma_4_22 | TAGCTGGCAGCCGAAAGGCAAACT     |
| actino_2_23 | CCGTTCCGCGGTTTCCCAAGTGA    | OP9_1_23     | GGGGTACCGTACAGGCTTACAGGGT | gamma_4_23 | TTAGCTGGCAGCCGAAAGGCAAACT    |
| actino_2_24 | CGGTATGATATCCCGGTGACAGGGC  | OP9_1_24     | GGGGTACCGTACAGGCTTACAGGGT | gamma_4_24 | GTTAGCTGGCAGCCGAAAGGCAAACT   |
| actino_2_25 | CCTAAGCTTGCAGTATCCAGCTG    | OP9_1_25     | TCGCGAATATGCTGGGCACTGCTC  | gamma_4_25 | GTTAGCTGGCAGCCGAAAGGCAAACT   |
| bacter_1_1  | GTITTCGGGACTGTATCCACGTTG   | planeto_1_1  | TGCAACACTTGTGCAAGTACACCC  | gamma_5_1  | CCACTAAGGCAAAATTCGCCAAC      |
| bacter_1_2  | TTTCGGGACTGTATCCACGTTG     | planeto_1_2  | GCAACACTTGTGCAAGTACACCC   | gamma_5_2  | CGCCACTAAGGCAAAATTCGCCAAC    |
| bacter_1_3  | ACGTTTCCGCACTGTATCCACG     | planeto_1_3  | ATGCAAACTGTGCAAGTACACCC   | gamma_5_3  | GCCTAAGGCAAAATTCGCCAAC       |
| bacter_1_4  | TTTCGGGACTGTATCCACGTTG     | planeto_1_4  | AACACTGTGCAAGTACACCCGAA   | gamma_5_4  | ACTAAGGCAAAATTCGCCAACG       |
| bacter_1_5  | CACGTTTCCGCACTGTATCCAC     | planeto_1_5  | AACACTGTGCAAGTACACCCGAA   | gamma_5_5  | ACTAAGGCAAAATTCGCCAACG       |
| bacter_1_6  | TCAGTTTCCGCACTGTATCCAC     | planeto_1_6  | GTGCAAGTACACCCGAAAGTAA    | gamma_5_6  | CTAAGGCAAAATTCGCCAACG        |
| bacter_1_7  | GGTTTCCGCACTGTATCCACG      | planeto_1_7  | GTGCAAGTACACCCGAAAGTAA    | gamma_5_7  | GGCCACTAAGGCAAAATTCGCCAAC    |
| bacter_1_8  | TGTCATTCACGTTGAGCCGAGTT    | planeto_1_8  | TCGAGGTACACCCGAAAGTAA     | gamma_5_8  | GGTACCGTCAAGCCGCAAGTATT      |
| bacter_1_9  | CTGTATTCACGTTGAGCCGAGTT    | planeto_1_9  | TGTCGAGGTACACCCGAAAGTAA   | gamma_5_9  | AGGTACCGTCAAGCCGCAAGTATT     |
| bacter_1_10 | CCGGGACTGTATCCACGTTG       | planeto_1_10 | CCCTGTGCAAGTACACCCGAAAGT  | gamma_5_10 | TAGGTACCGTCAAGCCGCAAGTATT    |
| bacter_1_11 | ACTGTATTCACGTTGAGCCGAG     | planeto_1_11 | ACTGTGTGCAAGTACACCCGAAAG  | gamma_5_11 | TGCGCCACTAAGGCAAAATTCGCC     |
| bacter_1_12 | CCGGGACTGTATCCACGTTG       | planeto_1_12 | ACTGTGTGCAAGTACACCCGAAAG  | gamma_5_12 | TAAGGGCAAAATTCGCCAACG        |
| bacter_1_13 | CGGACTGTATTCACGTTG         | planeto_1_13 | ACTGTGTGCAAGTACACCCGAAAG  | gamma_5_13 | CTGTAGGTAAGCCGTAAGAGCCGAG    |
| bacter_1_14 | CGGACTGTATTCACGTTG         | planeto_1_14 | CATGCAACACTTGTGCAAGTACAC  | gamma_5_14 | GTAGGTAAGCCGTAAGAGCCGAGT     |
| bacter_1_15 | CCGACTGTATTCACGTTG         | planeto_1_15 | CATGCAACACTTGTGCAAGTACAC  | gamma_5_15 | TGCTGGCACAATAAGGCAAAATTC     |
| bacter_1_16 | GATCGTATTCACGTTG           | planeto_1_16 | CACAGGTTAGCCAGTGTCTCTCT   | gamma_5_16 | TCTAGGTAAGCCGTAAGAGCCGAGT    |
| bacter_1_17 | ATCAAGTTTCCGCACTGTATCC     | planeto_1_17 | CACAGGTTAGCCAGTGTCTCTCT   | gamma_5_17 | TCGTAGGTAAGCCGTAAGAGCCGAG    |
| bacter_1_18 | GTATTCACGTTGAGCCGAGTT      | planeto_1_18 | AGCCAGTGTCTCTCTCTCTCTCT   | gamma_5_18 | GTTCCGCACTTGAAGGCAAAATTC     |
| bacter_1_19 | ACGTAACATACGCACTGATACAG    | planeto_1_19 | GCCACAGTGTAGCCAGTGTCTCTCT | gamma_5_19 | GTTCCGCACTTGAAGGCAAAATTC     |
| bacter_1_20 | GTATTCACGTTGAGCCGAGTT      | planeto_1_20 | GGCTTAGCCCTGTGATGCAAGCT   | gamma_5_20 | GTCGCGCACTTGAAGGCAAAATTC     |
| bacter_1_21 | GGTACCAATACGCACTGATACAG    | planeto_1_21 | GCAAGTACACCCGAAAGTAA      | gamma_5_21 | CTCTCGGTTCCGCAAGCCAAAC       |
| bacter_1_22 | GGTACCAATACGCACTGATACAG    | planeto_1_22 | ACCGCTTAGCCCTGTGATGCAAG   | gamma_5_22 | CATCTGTAGTAAAGCCGCAAGCCG     |
| bacter_1_23 | GATCACGTTTCCGCACTGTATCC    | planeto_1_23 | CAGGTTACACCCGAAAGTAA      | gamma_5_23 | CACCTGCAGCTGAAGAGCAAGCT      |
| bacter_1_24 | TACGGTACATACGCACTGATAC     | planeto_1_24 | CGGCTTAGCCCTGTGATGCAAG    | gamma_5_24 | CGCCACTGACGCTGAAGGCAAG       |
| bacter_1_25 | CACGGTACATACGCACTGATCC     | planeto_1_25 | CGGCTTAGCCCTGTGATGCAAG    | gamma_5_25 | GGCAAAATTCGCCAACCTGCTAGT     |
| bacter_2_1  | GGATTTCCGCGGCTACCTTCCGGT   | planeto_2_1  | TCGCAAGAGGCACTTCCCTTCC    | gamma_6_1  | AGCTGGCACAACCACTTGAATG       |
| bacter_2_2  | CTCCGGGCTACCTTCCGGTAAAGGG  | planeto_2_2  | TACGACCGAAGAACTTGGGAGGTC  | gamma_6_2  | CCAACTTGAATGAGGCGGACGG       |
| bacter_2_3  | CGGATTTTCCGGGCTACCTTCCGG   | planeto_2_3  | ACCGAAGAACTTGGGAGGTC      | gamma_6_3  | TGGCCCAACCACTTGAATGAGG       |
| bacter_2_4  | TTCCGGGCTACCTTCCGGTAAAG    | planeto_2_4  | CGACCGAAGAACTTGGGAGGTC    | gamma_6_4  | CGCCAACTTGAATGAGGCGG         |
| bacter_2_5  | TTTCCGGGCTACCTTCCGGTAAAG   | planeto_2_5  | CTCGAAGAGGCACTTCCCTTTCA   | gamma_6_5  | ACCAACTTGAATGAGGCGGACG       |
| bacter_2_6  | TTTCCGGGCTACCTTCCGGTAAAG   | planeto_2_6  | CGCCGACTTCTCTGAGGTTTGT    | gamma_6_6  | CTGGCCCAACCACTTGAATGAGG      |
| bacter_2_7  | GATTTTCCGGGCTACCTTCCGGTAA  | planeto_2_7  | AAACTGGGAGGACTCCCTCGATCA  | gamma_6_7  | CAACTCTTGAATGAGGCGGACG       |
| bacter_2_8  | ATTTTCCGGGCTACCTTCCGGTAA   | planeto_2_8  | TCCGAAGGCACTTCCCTTCC      | gamma_6_8  | CGCCCAACCACTTGAATGAGG        |
| bacter_2_9  | CCGATTTTCCGGGCTACCTTCCGG   | planeto_2_9  | CGCAGAGAATCTTGGGAGGTC     | gamma_6_9  | CGCCCAACCACTTGAATGAGG        |
| bacter_2_10 | TCGGGTTTCCGGGCTACCTTCCGG   | planeto_2_10 | AGACCGGAAACTTGGGAGGTC     | gamma_6_10 | CACCAACTTGAATGAGGCGGAC       |
| bacter_2_11 | TCGGGCTACCTTCCGGTAAAGGGT   | planeto_2_11 | CGCAACTGGGAGGTCCTCGATCC   | gamma_6_11 | GTCGCGCAACCACTTGAATGAGG      |
| bacter_2_12 | ATCCGATTTTCCGGGCTACCTTCC   | planeto_2_12 | CTTCCGAAAGGCACTTCCCTT     | gamma_6_12 | CCACCAACTTGAATGAGGCGGCA      |
| bacter_2_13 | CTTATGATTTAGCTCCCGGCTGCT   | planeto_2_13 | GCTCTGGAGTGGTATATCACTGTT  | gamma_6_13 | TAGGTGGCCACCACTTGAATGAGG     |
| bacter_2_14 | ACTTTATGATTTAGCTCCCGGCTG   | planeto_2_14 | TTCCGACGCTATTCACGCTGGAG   | gamma_6_14 | AACTCTTGAATGAGGCGGCGGCT      |
| bacter_2_15 | CCGGGCTACCTTCCGGTAAAGGGT   | planeto_2_15 | TTGGGATTAACCGCCAGTTTCCGGA | gamma_6_15 | AGAGGTCACCTTGGCCGCAAGGGC     |
| bacter_2_16 | GAATCCGATTTTCCGGGCTACCTT   | planeto_2_16 | CGCGAAACTTGGGAGGTCCTCTCG  | gamma_6_16 | GAGTTCACCTTGGCCGCAAGGGC      |
| bacter_2_17 | GCTACCTTCCGGTAAAGGGT       | planeto_2_17 | TGAGGACACCACTTCCAGGCGGTC  | gamma_6_17 | TCTTAGGTAACGTTCAATACCGGG     |
| bacter_2_18 | GGCTACCTTCCGGTAAAGGGT      | planeto_2_18 | AACCTGGGAGCTTCCGATCCAG    | gamma_6_18 | TTAGCTGGCCACCACTTCTGGA       |
| bacter_2_19 | GGCTACCTTCCGGTAAAGGGT      | planeto_2_19 | CCGCACTTCTCTGAGGTTTGTCTC  | gamma_6_19 | CAGAGGTTCACTTGGCCGCAAGGG     |
| bacter_2_20 | TAATCCGATTTTCCGGGCTACCT    | planeto_2_20 | TGGGATTAACCGCCAGTTTCCCGAC | gamma_6_20 | AGGTCCACTTGGCCGCAAGGGCT      |
| bacter_2_21 | CTACCTTCCGGTAAAGGGT        | planeto_2_21 | CGAGAACTGGGAGGTCCTCGA     | gamma_6_21 | ACCTTGAATGAGGCGGACCGGTA      |
| bacter_2_22 | CCGGCTACCTTCCGGTAAAGGGT    | planeto_2_22 | GAGAACTGGGAGGTCCTCGA      | gamma_6_22 | CGCGGGTACTTAACCGCACTT        |
| bacter_2_23 | TTAATCCGATTTTCCGGGCTACCT   | planeto_2_23 | CAGCCCTGAGGATGAGTATCACTG  | gamma_6_23 | CTTAGGTAACGTTCAATACCGGG      |
| bacter_2_24 | TTTATGATTTAGCTCCCGGCTGCT   | planeto_2_24 | AGCCGCACTTCTTGTAGGTTTGG   | gamma_6_24 | TCAGAGGTTCACTTGGCCGCAAGG     |
| bacter_2_25 | TACCTTCCGGTAAAGGGT         | planeto_2_25 | AATAGTGGCAGCACTTCCAGG     | gamma_6_25 | ACCGCGGGTATTAACCGCACTT       |
| bacter_3_1  | GGCTCTCCGGTATATCAGAAAT     | planeto_3_1  | CAAGTGCCTCAGTTAAGCTCAGG   | gamma_7_1  | GTCTCCGTTAGTTAGACTAGCCACT    |
| bacter_3_2  | CAACTTGCAAATCACTCCAGGGT    | planeto_3_2  | CGAGTGCCTCAGTTAAGCTCAGG   | gamma_7_2  | CGTCTCCGTTAGTTAGACTAGCCACT   |
| bacter_3_3  | CTTGCCAACTCACTCCAGGGT      | planeto_3_3  | CAACTTGCAGGAGTACCTCAGGAG  | gamma_7_3  | ACCGTCTCCGTTAGTTAGACTAGCCACT |
| bacter_3_4  | CAGGTAAGCTTCCGCTATCAT      | planeto_3_4  | GCACTCTGAGGAGTACCTCAGGAG  | gamma_7_4  | CGCTCTCCGTTAGTTAGACTAGCCACT  |
| bacter_3_5  | AGGCTCTCCGCTATCATGAAAT     | planeto_3_5  | TATGTTTCTACGCGCTTCCGCG    | gamma_7_5  | GACCGTCTCCGTTAGTTAGACTAGC    |
| bacter_3_6  | AACTTGCAAATCACTCCAGGTTG    | planeto_3_6  | CGAGAAAGGAAACTTCCCTCCG    | gamma_7_6  | TGACCTCTCCGTTAGTTAGACTAGC    |
| bacter_3_7  | ACCTTGCAAATCACTCCAGGTTG    | planeto_3_7  | CAACTTGCAGGAGTACCTCAGAGA  | gamma_7_7  | CTGACGTAACGTTCAAGTACTACC     |
| bacter_3_8  | TCAACTTGCAAATCACTCCAGGTTG  | planeto_3_8  | CTAACTTGCAGGAGTACCTCAGAGA | gamma_7_8  | TATAGGGTAAAGCTTCTCTCTG       |
| bacter_3_9  | GGTAAAGGCTCTCCGCTATCAT     | planeto_3_9  | TATGTTTCTACGCGCTTCCGCG    | gamma_7_9  | TGAGGTAACGTTCAAGTACTACC      |
| bacter_3_10 | TCGGCTACCCAACTACTCTAG      | planeto_3_10 | CTTATGTTTCTACGCGCTTCCG    | gamma_7_10 | CGAGGTAACGTTCAAGTACTACC      |
| bacter_3_11 | TTCAAATTTGCCAATCACTCCAGG   | planeto_3_11 | CTTATGTTTCTACGCGCTTCCG    | gamma_7_11 | TTCCGGGTTTCCCGCACTATG        |
| bacter_3_12 | CCCGGTAAGGCTCTCCGCTATC     | planeto_3_12 | ACTCTGAGGAGTACCTCAGAGAT   | gamma_7_12 | TCCCGGGTTTCCCGCACTATG        |
| bacter_3_13 | AGGTAAGGCTCTCCGCTATC       | planeto_3_13 | ACGCACTGCTCAGTTAAGCTCAGG  | gamma_7_13 | CTCCCGGGTTTCCCGCACTATG       |
| bacter_3_14 | CCAATCACTCCGAGGTTATCC      | planeto_3_14 | GTGCACTTACGCGGAGTACCTCA   | gamma_7_14 | TTCCCGGGTTTCCCGCACTATG       |
| bacter_3_15 | CTTGCCTACCTCCGCTATCATGGA   | planeto_3_15 | ATGTTTCTACGCGCTTCCGCGCT   | gamma_7_15 | CTCCCGGGTTTCCCGCACTATG       |
| bacter_3_16 | CTTGCCTACCTCCGCTATCATGGA   | planeto_3_16 | AACGCACTGCTCAGTTAAGCTCAG  | gamma_7_16 | CTCCCGGGTTTCCCGCACTATG       |
| bacter_3_17 | CCGCTACCCCACTACTCTAGA      | planeto_3_17 | CAGGCTCAGTAACTCAGGCA      | gamma_7_17 | CTCCCGGGTTTCCCGCACTATG       |
| bacter_3_18 | CCAGTAAGGCTCTCCGCTATCA     | planeto_3_18 | CTTCAACTTGCAGGAGTACCTCTC  | gamma_7_18 | ACTCGGTAAGGTAAGCTTCT         |
| bacter_3_19 | AAGGCTCTCCGCTATCATGAAA     | planeto_3_19 | CCTGAGGAGTACCTCAGAGATT    | gamma_7_19 | ACTCACCGTATTAGGGGTAAGCTT     |

|             |                             |            |                             |             |                              |
|-------------|-----------------------------|------------|-----------------------------|-------------|------------------------------|
| bacter_3_20 | GCCATCACTCCCAGGTGGATTAC     | plano_3_20 | TCTGTCAACTCTGAGGAGTACCCT    | gamma_7_20  | GTCAGTACTACCCGATATTAGGGG     |
| bacter_3_21 | TAAGGCTCTCGCCGTATCATCGAA    | plano_3_21 | GGAGTACCCTCAGAGATTTTCATCCC  | gamma_7_21  | TACCCGGTATTAGGGGTAAGCCTTC    |
| bacter_3_22 | GCCACAGTAAGGCTCTCGCCGTAT    | plano_3_22 | CAACCCAGCTGCTCAGTTAAGCTC    | gamma_7_22  | CCCGTATTAGGGGTAAGCCTTCCTC    |
| bacter_3_23 | CATTCCGCTACCCCACTATACTC     | plano_3_23 | CTTGTCAACTCTGAGGGAGTACC     | gamma_7_23  | GTACTACCCGATATTAGGGGTAAGC    |
| bacter_3_24 | CAATCACTCCCAGGTGGATTACT     | plano_3_24 | ACAGCAGAAAGAGGAAACCTCTCC    | gamma_7_24  | CACCCGATATTAGGGGTAAGCCTTC    |
| bacter_3_25 | CCGCCGAAGTTGTATCAAGAG       | plano_3_25 | CTAGGGGAGTATCCCTCAGAGATTTC  | gamma_7_25  | TACTACCCGATATTAGGGGTAAGC     |
| flavo_1_1   | CTAGACACCAAGGTCCAAAACAGCT   | plano_4_1  | ACTACTAATATCGCATCGGCCCTC    | gamma_8_1   | CCGGAGCTCATCATCAGCACAAGG     |
| flavo_1_2   | CAGACCAAGGCTCCAAAACAGCTAG   | plano_4_2  | CAACTACCTAATATCGCATCGGCCG   | gamma_8_2   | GCTCATCATCAGCACAAGGTCGGA     |
| flavo_1_3   | CCTCAGACACCAAGGTCCAAAACAG   | plano_4_3  | CAACTACCTAATATCGCATCGGCCG   | gamma_8_3   | CTCATCATCAGCACAAGGTCGGA      |
| flavo_1_4   | GACTTAGCCACTCAGACACCAAGGTCC | plano_4_4  | CAACTACCTAATATCGCATCGGCCG   | gamma_8_4   | ACGGGAGCTCATCATCAGCACAAG     |
| flavo_1_5   | ACTAGACACCAAGGTCCAAAACAGCT  | plano_4_5  | ACGTTCCGATGTTTCTTACCCCGT    | gamma_8_5   | CATCCATAGCACAAGGTCGGAAG      |
| flavo_1_6   | CTTAGCCACTCAGACACCAAGGTCTC  | plano_4_6  | TACGTTCCGATGTTTCTTACCCCG    | gamma_8_6   | GACCGAGCTCATCATCAGCACAAG     |
| flavo_1_7   | TACCGTCAAGCTTGGTACACGTACC   | plano_4_7  | GTACCTTCCGATGTTTCTTACCCCG   | gamma_8_7   | GACCGAGCTCATCATCAGCACAAG     |
| flavo_1_8   | GTACCGTCAAGCTTGGTACACGTACC  | plano_4_8  | GTACCTAATATCGCATCGGCCGCTC   | gamma_8_8   | GCGGCTCATCCATCAGCACAAGGT     |
| flavo_1_9   | GCCTCAGACACCAAGGTCTCAAAC    | plano_4_9  | CGTTCGATGTTTCTTACCCCGT      | gamma_8_9   | TCCATCAGCACAAGGTCGGAAGTTC    |
| flavo_1_10  | TTAGCCACTCAGACACCAAGGTCCA   | plano_4_10 | GTTTCCACCCTAATCCGTCGATG     | gamma_8_10  | CGACGGAGCTCATCATCAGCACA      |
| flavo_1_11  | ACCGTCAAGCTTGGTACACGTACCA   | plano_4_11 | TTCCACCCTAATCCGTCGATGTC     | gamma_8_11  | CATCAGCACAAGGTCGGAAGTTC      |
| flavo_1_12  | CCACTCAGACACCAAGGTCCAAAAC   | plano_4_12 | TTCCACCCTAATCCGTCGATGTC     | gamma_8_12  | CCTCTAATGGGAGATTCTCAGT       |
| flavo_1_13  | AGCCACTCAGACACCAAGGTCCAAA   | plano_4_13 | CCACCCTAATCCGTCGATGTC       | gamma_8_13  | CCCGCGAGCTCATCATCAGCACA      |
| flavo_1_14  | TAGCCACTCAGACACCAAGGTCCAAA  | plano_4_14 | GGCAGTAACTTGGTCTCTCCACC     | gamma_8_14  | CCCTCTAATGGGAGATTCTCAG       |
| flavo_1_15  | CCGTCAAGCTTGGTACACGTACCAA   | plano_4_15 | GGTAGTTCGATGTTTCTTACCC      | gamma_8_15  | CCCTCTAATGGGAGATTCTCAG       |
| flavo_1_16  | CGCTTAGCCACTCAGACACCAAGGT   | plano_4_16 | TGCGAGCTCATGAATGTTTCCACC    | gamma_8_16  | CCCTCTAATGGGAGATTCTCAG       |
| flavo_1_17  | TGCTTAGCCACTCAGACACCAAGGT   | plano_4_17 | GCGAGGCTCATGAATGTTTCCACC    | gamma_8_17  | CCCTCTAATGGGAGATTCTCAG       |
| flavo_1_18  | CGTCAAGCTTGGTACACGTACCAA    | plano_4_18 | GAGGCTCATGAATGTTTCCACCAC    | gamma_8_18  | CCCTCTAATGGGAGATTCTCAG       |
| flavo_1_19  | CAGTCAAGCTTGGTACACGTACCAA   | plano_4_19 | GAGGCTCATGAATGTTTCCACCAC    | gamma_8_19  | CCCGAGTATCCCTCTAATGGG        |
| flavo_1_20  | GCCTTAGCTAGAGACTATGGGGGAT   | plano_4_20 | CAGTATGCCCCAGTGAATCGCCTT    | gamma_8_20  | TCCGACGGAGCTCATCATCAGCA      |
| flavo_1_21  | TGCCATAGCTAGAGACTATGGGGGAT  | plano_4_21 | GTATGATGCCCCAGTGAATCGCCTT   | gamma_8_21  | GCTCATCATCAGCACAAGGTCGGA     |
| flavo_1_22  | ATGCCATAGCTAGAGACTATGGGGG   | plano_4_22 | GTATGATGCCCCAGTGAATCGCCTT   | gamma_8_22  | TTCCCCAGGTTATCCCTCTAATGG     |
| flavo_1_23  | TTCCGTTAGCCACTCAGACACCAAG   | plano_4_23 | GTTATGCCCCAGTGAATCGCCTT     | gamma_8_23  | CCCCAGGTTATCCCTCTAATGG       |
| flavo_1_24  | AGCTAGTAACTCGTTTACCCGGG     | plano_4_24 | CTTCACTGGATGTTTCAATTCACCT   | gamma_8_24  | TTCCCCAGGTTATCCCTCTAATGG     |
| flavo_1_25  | GTCAAAGCTTGGTACACGTACCAAAG  | plano_4_25 | CCGGCCCTTGGGGGAAAGAAAGCA    | gamma_9_1   | CTTGTCCATCCGTTCCCGAAGGCC     |
| flavo_2_1   | TACAGTACCGTCAAGCTCTACACG    | alpha_1_1  | CTGCTGTGACCCGGCCCTTGGGG     | gamma_9_2   | CTGTCCATCCGTTCCCGAAGGCC      |
| flavo_2_2   | TCTACAGTACCGTCAAGCTCTACAC   | alpha_1_2  | GCACCTGTGACCCGGCCCTTGGGG    | gamma_9_3   | TGTCCTCGGTTCCCGAAGGCCA       |
| flavo_2_3   | TTAAGTACCGTCAAGCTCTACACG    | alpha_1_3  | GTGCTGACCCGGCCCTTGGGGGAA    | gamma_9_4   | AGCCACTGTCCATCCGTTCCCGAAG    |
| flavo_2_4   | GCTATCACTCTTCTTACCCGCGAAG   | alpha_1_4  | ACCTGTGACCCGGCCCTTGGGGGAA   | gamma_9_5   | AGCCACTGTCCATCCGTTCCCGAAG    |
| flavo_2_5   | CATATCACTCTTCTTACCCGCGAAG   | alpha_1_5  | CTGTGACCCGGCCCTTGGGGGAA     | gamma_9_6   | AGCCACTGTCCATCCGTTCCCGAAG    |
| flavo_2_6   | ACAGTACCGTCAAGCTCTACACGT    | alpha_1_6  | CTGTGACCCGGCCCTTGGGGGAA     | gamma_9_7   | GTCATCATCCGTTCCCGAAGGCA      |
| flavo_2_7   | CAGTACCGTCAAGCTCTACACGT     | alpha_1_7  | CGCCCTTGGGGGAAAGAAAGCCAT    | gamma_9_8   | CACCTGTCCATCCGTTCCCGAAGG     |
| flavo_2_8   | CTTACAGTACCGTCAAGCTCTACA    | alpha_1_8  | GCACCCTGCGGGAAGAAAGCCAT     | gamma_9_9   | CTCCCTCTTCCGACTAGCTCT        |
| flavo_2_9   | TACTACTCTTCTTACCCGCGAAGCT   | alpha_1_9  | CACCCGGCCCTTGGGGGAAAGAAAG   | gamma_9_10  | GACCTGTCCATCCGTTCCCGAAGG     |
| flavo_2_10  | ATACTACTCTTCTTACCCGCGAAGCT  | alpha_1_10 | ACCCGGCCCTTGGGGGAAAGAAAG    | gamma_9_11  | GACAGCACTGCCATGGTTCCCGCA     |
| flavo_2_11  | CTTACTCTTCTTACCCGCGAAGCT    | alpha_1_11 | GTGACCCGGCCCTTGGGGGAAAG     | gamma_9_12  | ACCTCCCTCTCCGACTAGCTCT       |
| flavo_2_12  | CGCCAGTGGTCTCTCTGTCTAT      | alpha_1_12 | GTGACCCGGCCCTTGGGGGAAAG     | gamma_9_13  | CTTCTCTCTCCGACTAGCTCT        |
| flavo_2_13  | CCAGTGGTCTCTCTGTCTAT        | alpha_1_13 | TGACCCGGCCCTTGGGGGAAAG      | gamma_9_14  | TCTCTCCGACTAGCTCTCAGTA       |
| flavo_2_14  | CCAGTGGTCTCTCTGTCTAT        | alpha_1_14 | TGACCCGGCCCTTGGGGGAAAG      | gamma_9_15  | TGCGACTTAGCTCTCAGTATGG       |
| flavo_2_15  | CGCCAGTGGTCTCTCTGTCTAT      | alpha_1_15 | TGACCCGGCCCTTGGGGGAAAG      | gamma_9_16  | CTCCGACTTAGCTCTCAGTATGG      |
| flavo_2_16  | GCCACAGTGGTCTCTCTGTCTAT     | alpha_1_16 | GTGCGGGAAGAAAGCCATCTGGC     | gamma_9_17  | TACCTCCCTCTCCGACTAGCTCT      |
| flavo_2_17  | GACTCCGATCCGAACTGTGATATAG   | alpha_1_17 | CGCCCTTGGGGGAAAGAAAGCCAT    | gamma_9_18  | CTTCCGACTTAGCTCTCAGTATGG     |
| flavo_2_18  | AGAACGCTACTACTCTTACCCGCG    | alpha_1_18 | GACGCACTGTGACCCGGCCCTTGG    | gamma_9_19  | CCTCTCCGACTTAGCTCTCAGTATGG   |
| flavo_2_19  | GAACGCTACTACTCTTACCCGCG     | alpha_1_19 | TGCGGGAAGAAAGCCATCTTGGCG    | gamma_9_20  | CTTCCGACTTAGCTCTCAGTATGG     |
| flavo_2_20  | CAGTACGAGCGGTTTCTCTCTGTAT   | alpha_1_20 | AAAGCACTCTTGGGATCATACCCG    | gamma_9_21  | ACTCCGTTGTAATCCGCTCCCGCA     |
| flavo_2_21  | GTCTCTGCTACACATTAAGCC       | alpha_1_21 | CGCCCTTGGGGGAAAGAAAGCCAT    | gamma_9_22  | TCCTCTGGTTCCCGAAGGCCATCC     |
| flavo_2_22  | ACTACTCTTCTACCCGCGAAGCTT    | alpha_1_22 | AACAGCAAGCTGCCAACCCGCTAGC   | gamma_9_23  | TACTCTCCGTTCCCGAAGGCCATCC    |
| flavo_2_23  | CCCTACTCTCTAGTACCATGGTGT    | alpha_1_23 | CATGACGACTGTGACCCGGCCCTT    | gamma_9_24  | CTTCTCTCCGACTTAGCTCTCAG      |
| flavo_2_24  | CCCTACTCTCTAGTACCATGGTGT    | alpha_1_24 | GCAAGCTGCCAACCCGCTAGCATCC   | gamma_9_25  | CGCGAGGACATCCGATAGCCGAGG     |
| flavo_2_25  | CTTCTACTCTAGTACCATGGTGT     | alpha_1_25 | GTGACCCGGAAGTGTGCTTCGATC    | gamma_10_1  | ACGAGGACATCCGATAGCCGAGG      |
| flavo_3_1   | CTGTCACTAACATTTAAGCCCTGG    | alpha_2_1  | GTATTCACCCGGGACGGCTGATTCG   | gamma_10_2  | CGGCTTCCGGCCCTCTGTACTTGC     |
| flavo_3_2   | CGTCAAGCTTCTTACAGGAAAGT     | alpha_2_2  | TGTTTACCCGGGACGGCTGATTCG    | gamma_10_3  | CGGCTTCCGGCCCTCTGTACTTGC     |
| flavo_3_3   | ACCGTCAAGCTTCTTACAGGAAAGT   | alpha_2_3  | CTTACTCCGGGACGGCTGATTCG     | gamma_10_4  | GGCTTCCGGCCCTCTGTACTTGC      |
| flavo_3_4   | CTTACTACTTTTGTCCACCTACGG    | alpha_2_4  | GGAACGATTCACCCGGGACGGCTG    | gamma_10_5  | GGCTTCCGGCCCTCTGTACTTGC      |
| flavo_3_5   | GCTCTACTTATTGTCCACCTACGG    | alpha_2_5  | CGGGACGATTCACCCGGGACGGCTG   | gamma_10_6  | GGCTTCCGGCCCTCTGTACTTGC      |
| flavo_3_6   | GTACCGTCAAGCTTCTTACAGGAA    | alpha_2_6  | CGGGACGATTCACCCGGGACGGCTG   | gamma_10_7  | GCTTCCGGCCCTCTGTACTTGC       |
| flavo_3_7   | GAGGCAAGTATGTATACGCGTACTC   | alpha_2_7  | CGGGACGATTCACCCGGGACGGCTG   | gamma_10_8  | CTTCCGGCCCTCTGTACTTGC        |
| flavo_3_8   | TCTATCTAGCTAGTGTGCGCTT      | alpha_2_8  | GGGAAAGTATTCACCCGGGACGGCTG  | gamma_10_9  | CCTACTGGGTAGTTTCTCAGCG       |
| flavo_3_9   | CCCTACTCTTCTAGTACCATGGTGT   | alpha_2_9  | GGGAAAGTATTCACCCGGGACGGCTG  | gamma_10_10 | CCCTACTGGGTAGTTTCTCAGCG      |
| flavo_3_10  | ATCTACTAGTACCTAGTGTGCGCTT   | alpha_2_10 | AACGATTCACCCGGGACGGCTGAT    | gamma_10_11 | CCCTACTGGGTAGTTTCTCAGCG      |
| flavo_3_11  | CCCTACTCTTCTAGTACCATGGTGT   | alpha_2_11 | ATTCACCCGGGACGGCTGATTCG     | gamma_10_12 | CCCTACTGGGTAGTTTCTCAGCG      |
| flavo_3_12  | TATCTACTAGTACCTAGTGTGCGCTT  | alpha_2_12 | CGGGAAAGTATTCACCCGGGACGGCTG | gamma_10_13 | CCCTACTGGGTAGTTTCTCAGCG      |
| flavo_3_13  | CCTACTCTTCTAGTACCATGGTGT    | alpha_2_13 | CGGGAAAGTATTCACCCGGGACGGCTG | gamma_10_14 | CCCTACTGGGTAGTTTCTCAGCG      |
| flavo_3_14  | CTTACTCTTCTAGTACCATGGTGT    | alpha_2_14 | CGGGAAAGTATTCACCCGGGACGGCTG | gamma_10_15 | CCCTACTGGGTAGTTTCTCAGCG      |
| flavo_3_15  | CTTACTCTTCTAGTACCATGGTGT    | alpha_2_15 | CGGGAAAGTATTCACCCGGGACGGCTG | gamma_10_16 | CCCTACTGGGTAGTTTCTCAGCG      |
| flavo_3_16  | TATCTAGTACCTAGTGTGCGCTTAC   | alpha_2_16 | TACCCGGGACGGCTGATTCGCGATTA  | gamma_10_17 | CCCTACTGGGTAGTTTCTCAGCG      |
| flavo_3_17  | CTTACTCTTCTAGTACCATGGTGT    | alpha_2_17 | CGGGAAAGTATTCACCCGGGACGGCTG | gamma_10_18 | CCCTACTGGGTAGTTTCTCAGCG      |
| flavo_3_18  | ACTTACTTGTCCACCTACGGACCTT   | alpha_2_18 | GCGGACGGCTGATTCGCGATTA      | gamma_10_19 | CCCTACTGGGTAGTTTCTCAGCG      |
| flavo_3_19  | GACTTATTGTCCACCTACGGACCTT   | alpha_2_19 | TTACCCGGGACGGCTGATTCGCGA    | gamma_10_20 | CCCTACTGGGTAGTTTCTCAGCG      |
| flavo_3_20  | TGACTTATTGTCCACCTACGGACCTT  | alpha_2_20 | CTTCACTGTGATGATGCGGCTT      | gamma_10_21 | CCCTACTGGGTAGTTTCTCAGCG      |
| flavo_3_21  | GTACTTATTGTCCACCTACGGACCTT  | alpha_2_21 | CGGGAAAGTATTCACCCGGGACGGCTG | gamma_10_22 | CCCTACTGGGTAGTTTCTCAGCG      |
| flavo_3_22  | AGATTGTATACGGGATCTACCCCGG   | alpha_2_22 | AGTGGGGCTCATCTTTCGGGCTA     | gamma_10_23 | CCCTACTGGGTAGTTTCTCAGCG      |
| flavo_3_23  | GATTGTATACGGGATCTACCCCGG    | alpha_2_23 | AGTGGGGCTCATCTTTCGGGCTA     | gamma_10_24 | CCCTACTGGGTAGTTTCTCAGCG      |
| flavo_3_24  | TCTTGGGGCTATTCCTAGTATGAG    | alpha_2_24 | GTGGGGCTCATCTTTCGGGCTA      | gamma_10_25 | CCCTACTGGGTAGTTTCTCAGCG      |
| flavo_3_25  | TCTTGGGGCTATTCCTAGTATGAG    | alpha_2_25 | ACTCTGTATCCAAATCCACCCGAA    | gamma_11_1  | CTTTCCTCCCGTAGGATATATGGGG    |
| flavo_4_1   | CAGGAGATATTCCTACTATGAGGG    | alpha_3_1  | ACCTGTATCCAAATCCACCCGAA     | gamma_11_2  | CTTTCCTCCCGTAGGATATATGGGG    |
| flavo_4_2   | TCAAATCCCAACAGTGGGAGTGT     | alpha_3_2  | CCTGTATCCAAATCCACCCGAA      | gamma_11_3  | CTTTCCTCCCGTAGGATATATGGGG    |
| flavo_4_3   | CAAATCCCAACAGTGGGAGTGT      | alpha_3_3  | CGACTGTATCCAAATCCACCCGAA    | gamma_11_4  | CTGCTTTCCTCCCGTAGGATATATGG   |
| flavo_4_4   | GTCAAATCCCAACAGTGGGAGTGT    | alpha_3_4  | GGACCTGTATCCAAATCCACCCGAA   | gamma_11_5  | CTGCTTTCCTCCCGTAGGATATATGG   |
| flavo_4_5   | GGAGATATTCCTACTATGGGGCA     | alpha_3_5  | AGCACCTGTATCCAAATCCACCCGAA  | gamma_11_6  | CCCTGCTTTCCTCCCGTAGGATATATGG |
| flavo_4_6   | AGGAGATATTCCTACTATGGGGCA    | alpha_3_6  | CGGAAAGTATTCACCCGGGACGGCTG  | gamma_11_7  | CTTACTCAGGCTCATCAATAGCGG     |
| flavo_4_7   | CGTCAAATCCCAACAGTGGGAGTGT   | alpha_3_7  | CAGCAGCTGTATCCAAATCCACCCGAA | gamma_11_8  | CCCTGCTTTCCTCCCGTAGGATATATGG |
| flavo_4_8   | AAACTCCCAACAGTGGGAGTGGTTC   | alpha_3_8  | CGGCAAGTGTATCCAAATCCACCCGAA | gamma_11_9  | CTTACTCAGGCTCATCAATAGCGG     |
| flavo_4_9   | CTGGGCTATTCCTCCCAAAGGTA     | alpha_3_9  | CGGCAAGTGTATCCAAATCCACCCGAA | gamma_11_10 | CTTACTCAGGCTCATCAATAGCGG     |
| flavo_4_10  | CGTCAAATCCCAACAGTGGGAGTGT   | alpha_3_10 | CGGCAAGTGTATCCAAATCCACCCGAA | gamma_11_11 | CTTACTCAGGCTCATCAATAGCGG     |
| flavo_4_11  | CTTAAACCTCAGCCCTTAATCGGG    | alpha_3_11 | CGGCAAGTGTATCCAAATCCACCCGAA | gamma_11_12 | CTTACTCAGGCTCATCAATAGCGG     |
| flavo_4_12  | GTTTCCCTGGGCTATTCCTCCCAA    | alpha_3_12 | CGGCAAGTGTATCCAAATCCACCCGAA | gamma_11_13 | CTTACTCAGGCTCATCAATAGCGG     |
| flavo_4_13  | GCTTAAACCTCAGCCCTTAATCGGG   | alpha_3_13 | CGGCAAGTGTATCCAAATCCACCCGAA | gamma_11_14 | CTTACTCAGGCTCATCAATAGCGG     |
| flavo_4_14  | ACTCCCAACAGTGGGAGTGGTCT     | alpha_3_14 | CGGCAAGTGTATCCAAATCCACCCGAA | gamma_11_15 | CTTACTCAGGCTCATCAATAGCGG     |
| flavo_4_15  | ACCTCAAACTCCCAACAGTGGGAGG   | alpha_3_15 | CGGCAAGTGTATCCAAATCCACCCGAA | gamma_11_16 | CTTACTCAGGCTCATCAATAGCGG     |
| flavo_4_16  | CACACCTGGGAGTGGTCTTCTCTC    | alpha_3_16 | CGGCAAGTGTATCCAAATCCACCCGAA | gamma_11_17 | CTTACTCAGGCTCATCAATAGCGG     |
| flavo_4_17  | AGTITTCCTGGGCTATTCCTCCCA    | alpha_3_17 | CGGCAAGTGTATCCAAATCCACCCGAA | gamma_11_18 | CTTACTCAGGCTCATCAATAGCGG     |
| flavo_4_18  | TTAACCACTCAGCCCTTAATCGGG    | alpha_3_18 | CGGCAAGTGTATCCAAATCCACCCGAA | gamma_11_19 | CTTACTCAGGCTCATCAATAGCGG     |
| flavo_4_19  | CACGCTGGGAGTGGTCTTCTCTGT    | alpha_3_19 | CGGCAAGTGTATCCAAATCCACCCGAA | gamma_11_20 | CTTACTCAGGCTCATCAATAGCGG     |
| flavo_4_20  | CACAGCTGGGAGTGGTCTTCTCTGT   | alpha_3_20 | CGGCAAGTGTATCCAAATCCACCCGAA | gamma_11_21 | CTTACTCAGGCTCATCAATAGCGG     |
| flavo_4_21  | ACACGCTGGGAGTGGTCTTCTCTGT   | alpha_3_21 | CGGCAAGTGTATCCAAATCCACCCGAA | gamma_11_22 | CTTACTCAGGCTCATCAATAGCGG     |
| flavo_4_22  | CGCTTAAACCACTCAGCCCTTAATCGG | alpha_3_22 | CGGCAAGTGTATCCAAATCCACCCGAA | gamma_11_23 | CTTACTCAGGCTCATCAATAGCGG     |
| flavo_4_23  | ACGTGGGAGTGGTCTTCTCTGTAT    | alpha_3_23 | CGGCAAGTGTATCCAAATCCACCCGAA | gamma_11_24 | CTTACTCAGGCTCATCAATAGCGG     |
| flavo_4_24  | TTTCCCTGGGCTATTCCTCCCAA     | alpha_3_24 | CGGCAAGTGTATCCAAATCCACCCGAA | gamma_11_25 | CTTACTCAGGCTCATCAATAGCGG     |
| flavo_4_25  | TTTCCCTGGGCTATTCCTCCCAA     | alpha_3_25 | CGGCAAGTGTATCCAAATCCACCCGAA | gamma_12_1  | CTTACTCAGGCTCATCAATAGCGG     |
| flavo_5_1   | CGTCAAAGCTTCAACAGTGAACCTT   | roseo_1_1  | CTTCCGCTTAAATAGTGGGCGACC    | gamma_12_2  | CCTACTCCGTTAGTATTCCTACCG     |
| flavo_5_2   | ACGATCAAGCTTCAACAGTGAACCTT  | roseo_1_2  | CGCTTAAATAGTGGGCGACC        | gamma_12_3  | CCCTACTCCGTTAGTATTCCTACCG    |
| flavo_5_3   | CGTCAAAGCTTCAACAGTGAACCTT   | roseo_1_3  | CGCTTAAATAGTGGGCGACC        | gamma_12_4  | CCCTACTCCGTTAGTATTCCTACCG    |
| flavo_5_4   | CAGTACCGTCAACAGTTCACACCTG   | roseo_1_4  | GCCCTTAAATAGTGGGCGACC       | gamma_12_5  | CCCTACTCCGTTAGTATTCCTACCG    |
| flavo_5_5   | TACAGTACCGTCAACAGTTCACACCTG | roseo_1_5  | GCCCTTAAATAGTGGGCGACC       | gamma_12_6  | CCCTACTCCGTTAGTATTCCTACCG    |
| flavo_5_6   | ACCGTCAACAGTTCACACCTGAACC   | roseo_1_6  | CGTGGTGGTGGCCCTATAAATAG     |             |                              |

|            |                            |            |                           |             |                           |
|------------|----------------------------|------------|---------------------------|-------------|---------------------------|
| flavo_5_7  | CTACAGTACCGTCAACAGTTCACAC  | roseo_1_7  | CTGGCCCTATAAATAGTGGCGCAC  | gamma_12_7  | CCCCACTCTGGTGTAGTTCCTACG  |
| flavo_5_8  | TACCGTCAACAGTTCACACGTGAAC  | roseo_1_8  | CGTGGTGGTGGTGGCCCTATAAATA | gamma_12_8  | CGGTATGGAACCTCTGTACGCC    |
| flavo_5_9  | AGTACCGTCAACAGTTCACACGTGA  | roseo_1_9  | TGGTGGCCCTATAAATAGTGGCG   | gamma_12_9  | ACTGTGGTGGCCCTACTGGTGG    |
| flavo_5_10 | GTACCGTCAACAGTTCACACGTGAA  | roseo_1_10 | GGTGGCCCTATAAATAGTGGCGC   | gamma_12_10 | TCCAAGTGTGGTGGCCCTACTG    |
| flavo_5_11 | TCTACAGTACCGTCAACAGTTCAC   | roseo_1_11 | GGATTCGGCGCAAGTATGTCAAGG  | gamma_12_11 | CCCCACTCTGGTGTAGTTCCTAC   |
| flavo_5_12 | CCTACAGTACCGTCAACAGTTCAC   | roseo_1_12 | GTGGCCCTATAAATAGTGGCGCA   | gamma_12_12 | CGCGTATGGAACCTCTGTACCCG   |
| flavo_5_13 | CCGAAGAAAAGAGTGTTCACACCC   | roseo_1_13 | ACCGTGGTGGTGGCCCTATAAAT   | gamma_12_13 | GCGGTATGCGAACCTCTGTACCTT  |
| flavo_5_14 | CTAGACCCGAATAGTCCGAACAG    | roseo_1_14 | CACTCTGGTAAATCCGCGACAAGTA | gamma_12_14 | TCTATCAGTGTGGGTGGAGTTC    |
| flavo_5_15 | TAGCCCTCAGACCCGAATAGTCC    | roseo_1_15 | ATAGTGGCGCACCACTTCCGGTGA  | gamma_12_15 | GTCATCAGTGTGGGTGGAGTTC    |
| flavo_5_16 | TTAGCCCTCAGACCCGAATAGTCC   | roseo_1_16 | GGAAATCACTCTGGAAATCCGGTGA | gamma_12_16 | CTGTGGTGGCCCTACTCTGTACG   |
| flavo_5_17 | ACTCAGACCCGAATAGTCCGAACA   | roseo_1_17 | TACCCTGGTGGTGGCCCTATAA    | gamma_12_17 | CTATCAGTGTGGGTGGAGTTC     |
| flavo_5_18 | AGATGTTTCCACCCCTGTCAACTGT  | roseo_1_18 | GAATCCGCGACAAGTATGTCAAGG  | gamma_12_18 | CTGTGGTAAAGCTACAGTGAAGG   |
| flavo_5_19 | CAGACCCGAATAGTCCGAACAGCT   | roseo_1_19 | TCCATCTCTGGAAATCCGCGACAAG | gamma_12_19 | CAGTGTGGGTGGAGTTCACAGT    |
| flavo_5_20 | GCCACTCAGACCCGAATAGTCCGA   | roseo_1_20 | ATCCACTCTGGAAATCCGCGACAAG | gamma_12_20 | AGTGTGGGTGGAGTTCACAGT     |
| flavo_5_21 | CACCTCAGACCCGAATAGTCCGAAC  | roseo_1_21 | TAGTGTGGCGCACCACTTCCGGTGA | gamma_12_21 | TTCCAACTGTGGTGGCCCTACT    |
| flavo_5_22 | CTTAGCCACTCAGACCCGAATAGT   | roseo_1_22 | CCTACCGTGGTGGTGGCCCTATA   | gamma_12_22 | TATCAGTGTGGGTGGAGTTC      |
| flavo_5_23 | AGCCACTCAGACCCGAATAGTCCG   | roseo_1_23 | CTACCGTGGTGGTGGCCCTATA    | gamma_12_23 | CGGTATGCGAACCTCTGTACGTC   |
| flavo_5_24 | TCAGACCCGAATAGTCCGAACAGC   | roseo_1_24 | AGCGTGGCACCACTTCTCCGGT    | gamma_12_24 | CCCCCAACTAATCTACAGC       |
| flavo_5_25 | ACTTTGCTTAGCCACTCAGACCCG   | roseo_1_25 | GACGTCTCCACACTTCTCCGGC    | gamma_12_25 | GTCCAGGACTAGCAAGCTGCTG    |
| flavo_6_1  | AGTGGCGGAGTAAAGCCCTGCATT   | roseo_2_1  | GTCACCGGTCACCGAAGTGA      | gamma_13_1  | GCCCACTGAAGAACATTTGTCCCA  |
| flavo_6_2  | GTGCGCGAGTAAAGCCCTGCATT    | roseo_2_2  | ACCGGGTACCGGAAGTGA        | gamma_13_2  | GCCGCACTGAAGAACATTTGTCC   |
| flavo_6_3  | CAGTGGCGGAGTAAAGCCCTGCAT   | roseo_2_3  | CACCGGGTACCGGAAGTGA       | gamma_13_3  | TGCGCACTGAAGAACATTTGTCC   |
| flavo_6_4  | TGCGCGGAGTAAAGCCCTGCATT    | roseo_2_4  | TCCCGGGTACCGGAAGTGA       | gamma_13_4  | TGTACAGTACAGTACAGGAGCCG   |
| flavo_6_5  | AGTAAAGCCCTGCATTCCACCACT   | roseo_2_5  | TGTCACCGGTCACCGAAGTGA     | gamma_13_5  | GTGTCAGTACAGTACAGGAGCCG   |
| flavo_6_6  | GTTAAAGCCCTGCATTCCACCACT   | roseo_2_6  | CGGGTACCGGAAGTGA          | gamma_13_6  | CTGCGCACTGAAGAACATTTGT    |
| flavo_6_7  | GGCAGTGGCGGAGTAAAGCCCTGC   | roseo_2_7  | AGATCTCTGGCGGTCCCGGATG    | gamma_13_7  | CTTGGCTCAAGAGGCACTCTCA    |
| flavo_6_8  | TGGCAGTGGCGGAGTAAAGCCCTGC  | roseo_2_8  | ACCAAGATCTCTGGCGGTCCCG    | gamma_13_8  | GAGAGGCTCAAGAGGAGCCCTTT   |
| flavo_6_9  | GAGTAAAGCCCTGCATTCCACCACT  | roseo_2_9  | AACCAAGATCTCTGGCGGTCCCG   | gamma_13_9  | CGAGAGTCAAGAGGAGCCCTTT    |
| flavo_6_10 | GAGTAAAGCCCTGCATTCCACCACT  | roseo_2_10 | AACCAAGATCTCTGGCGGTCCCG   | gamma_13_10 | GCGAGGCTCAAGAGGAGCCCTTT   |
| flavo_6_11 | GCGGAGGTTAAAGCCCTGCATTCCA  | roseo_2_11 | TCTCTGGCGGTCCCGGATGTCAAG  | gamma_13_11 | TAGGAGGAGTCAAGAGGAGCCCT   |
| flavo_6_12 | ATGGCAGTGGCGGAGTAAAGCCCT   | roseo_2_12 | ATCTCTGGCGGTCCCGGATGTCA   | gamma_13_12 | AGAGTCAAGAGGAGCCCTTT      |
| flavo_6_13 | TAAAGCCCTGCATTCCACCACTCA   | roseo_2_13 | GATCTCTGGCGGTCCCGGATGTCA  | gamma_13_13 | AGCGAGGCTCAAGAGGAGCCCT    |
| flavo_6_14 | GGAGTAAAGCCCTGCATTCCACCA   | roseo_2_14 | CTACTCTCTGGCGGTCCCGGATGT  | gamma_13_14 | GTACAGTACAGTCAAGAGGAGCC   |
| flavo_6_15 | CGGAGTAAAGCCCTGCATTCCAC    | roseo_2_15 | CTCTGGCGGTCCCGGATGTCAAGG  | gamma_13_15 | TCAGTACAGTCAAGAGGAGCCCT   |
| flavo_6_16 | CCCTGCATTCCACCACTGACTTAC   | roseo_2_16 | TCTGGCGGTCCCGGATGTCAAGG   | gamma_13_16 | AGTACAGATCCAGAGGAGCCCTT   |
| flavo_6_17 | CAATGGCAGTGGCGGAGTAAAGCC   | roseo_2_17 | CCAGATCTCTGGCGGTCCCGGGA   | gamma_13_17 | AGTACAGATCCAGAGGAGCCCTT   |
| flavo_6_18 | TAAAGTGGAGTGGCGGAGTAAAGCC  | roseo_2_18 | TCTCTGGCGGTCCCGGATGTCA    | gamma_13_18 | GCTGGCCACTGAAGAACATTTGT   |
| flavo_6_19 | CGCTAAGCGGTTCAGGACTTCAAGC  | roseo_2_19 | CTCTGGCGGTCCCGGATGTCA     | gamma_13_19 | TGAGTCTCAGAGGAGCCCTTT     |
| flavo_6_20 | CCGAGGTTAAAGCCCTGCATTCCAC  | roseo_2_20 | CTGGCGGTCCCGGATGTCAAGG    | gamma_13_20 | CTTGGCTCAAGAGGCACTCTCT    |
| flavo_6_21 | AATGGCAGTGGCGGAGTAAAGCC    | roseo_2_21 | CTGCTACCGGTCACCGAAGTGA    | gamma_13_21 | AGTGTACAGTACAGTACAGGAGC   |
| flavo_6_22 | TATCAATGGCAGTGGCGGAGTAAAG  | roseo_2_22 | CCTGTACCGGTCACCGAAGTGA    | gamma_13_22 | GCCCTTTCTCCCTTAGGAGTGA    |
| flavo_6_23 | GFATCAATGGCAGTGGCGGAGTAA   | roseo_2_23 | GTCTACCGGTCACCGAAGTGA     | gamma_13_23 | AGGCTCAAGAGGAGCCCTTTCT    |
| flavo_6_24 | CCCTGCATTCCACCACTGACTTAA   | roseo_2_24 | CGGGTACCGGAAGTGA          | gamma_13_24 | AGTCCGCCACTGAAGAACATTTG   |
| flavo_6_25 | TAAAGCCCTGCATTCCACCACTGAC  | roseo_2_25 | AAACAGATCTCTGGCGGTCCCG    | gamma_13_25 | CGAGAGTCAAGAGGAGCCCTTT    |
| flavo_7_1  | TCTTACAGTACCGTACCAGACTAC   | roseo_3_1  | GCCGTCACCGGAAGTGGCCGCTC   | gamma_14_1  | GGCGGTCACTACTAGTGTAGTGC   |
| flavo_7_2  | CTTACCCGACTCCAGACTAC       | roseo_3_2  | CTACACCCGAAGTGGCCGCTGACT  | gamma_14_2  | CCAGGGCTCACTACTAGTGTAG    |
| flavo_7_3  | CGTACCCAGACTACAGTGTCTT     | roseo_3_3  | GCTACCCGGAAGTGGCCGCTGAC   | gamma_14_3  | CGGTCACCTACTACTGTAGTGC    |
| flavo_7_4  | GTACCCGACTACAGTACAGTGT     | roseo_3_4  | GCCTACCCGGAAGTGGCCGCTG    | gamma_14_4  | CAGGCGGTCACTACTAGTGTAG    |
| flavo_7_5  | CCGTCACCCAGACTACAGTGTCT    | roseo_3_5  | CGCTACCCGGAAGTGGCCGCTG    | gamma_14_5  | CCAGGGGTCACTACTAGTGTAG    |
| flavo_7_6  | TACCCGACTACAGTGTCT         | roseo_3_6  | CGCCGTCACCCGGAAGTGGCCG    | gamma_14_6  | CCGAGGGCACTGCTTACTACAAG   |
| flavo_7_7  | ACCGTACCCAGACTACAGTGTCT    | roseo_3_7  | CGCCGTCACCCGGAAGTGGCCG    | gamma_14_7  | CGAGGGCACTGCTTACTACAAG    |
| flavo_7_8  | TTACAGTACCCGACTACAGTGTCT   | roseo_3_8  | TACCCGGAAGTGGCCGCTGACTT   | gamma_14_8  | TCCGAGGGCACTGCTTACTACA    |
| flavo_7_9  | GTACCCAGACTACAGTGTCTT      | roseo_3_9  | TCCCGGCTACCCGGAAGTGGCC    | gamma_14_9  | CCCGAGGGCACTGCTTACTACA    |
| flavo_7_10 | TACAGTACCCGACTACAGTGTCT    | roseo_3_10 | ACCCGGAAGTGGCCGCTGACTT    | gamma_14_10 | CCCGAGGGCACTGCTTACTACA    |
| flavo_7_11 | ACAGTACCCGACTACAGTGTCT     | roseo_3_11 | GTCGCGGCTACCCGGAAGTGGC    | gamma_14_11 | TCCCGAGGGCACTGCTTACTAG    |
| flavo_7_12 | AACTTCCACCCGACTTAAAGCC     | roseo_3_12 | ATCCGGAAGTGGCCGCTGACTTGA  | gamma_14_12 | CTCCGAGGGCACTGCTTACTACA   |
| flavo_7_13 | CCAGTACCCGACTACAGTGTCT     | roseo_3_13 | CCCGGAAGTGGCCGCTGACTTGA   | gamma_14_13 | CTCCCGAGGGCACTGCTTACTAG   |
| flavo_7_14 | CGTTCGCTACAGAACAGCAAGCTTC  | roseo_3_14 | CGTCCGCGTACCCGGAAGTGGC    | gamma_14_14 | GCTCCGAGGGCACTGCTTACTAG   |
| flavo_7_15 | ACTTTCACCCGACTTAAAGCC      | roseo_3_15 | CACCTGTCTTACAGAAAACCCG    | gamma_14_15 | TCTTGGTCCCGAGGGCACTGCTC   |
| flavo_7_16 | CCCTGCATTACAGCCCGCTACGG    | roseo_3_16 | CCAGGAGTGTGGAGGCGGCTTCAG  | gamma_14_16 | GGTCCCGAGGGCACTGCTTACTA   |
| flavo_7_17 | TGCTTGGCGGCTCAGTTCGAAATC   | roseo_3_17 | ACCTGGTCTTACAGAAAACCCG    | gamma_14_17 | TATCTGGTCCCGAGGGCACTGCT   |
| flavo_7_18 | CGTTCGCGGCTCAGTTCGAAATC    | roseo_3_18 | CGGAGTCTTGGCGGCTTCAGGGA   | gamma_14_18 | ACTCCGAGGGCACTGCTTACTAG   |
| flavo_7_19 | TTTGGTGGCGGCTCAGTTCGAAAT   | roseo_3_19 | CCGAAAGTGGCGGCTGACTGTACT  | gamma_14_19 | ACTTGGTCCCGAGGGCACTGCT    |
| flavo_7_20 | TTTGGTGGCGGCTCAGTTCGAAAT   | roseo_3_20 | ACCGAGGTTTGGAGGCGGTTCCA   | gamma_14_20 | TACTAGTGTACGTGGCCACTGAGA  |
| flavo_7_21 | TTTGGTGGCGGCTCAGTTCGAAAT   | roseo_3_21 | CAGGAGTGTGGAGGCGGTTCCAG   | gamma_14_21 | GTACTTGTGCTCCGAGGGCACTG   |
| flavo_7_22 | TTTGGTGGCGGCTCAGTTCGAAAT   | roseo_3_22 | CCGAAGTGTGGCGGCTGACTGTACT | gamma_14_22 | CTTGGTCCCGAGGGCACTGCTCA   |
| flavo_7_23 | TTTGGTGGCGGCTCAGTTCGAAAT   | roseo_3_23 | CGCTCCGCGTACCCGGAAGGTTG   | gamma_14_23 | GGTCCCGAGGGCACTGCTTACT    |
| flavo_7_24 | GGCTATCCCTTAGTGTAAAGGCAAT  | roseo_3_24 | AAACGGATCTCTCCGCGGTTCCAG  | gamma_14_24 | ACTAGTGTAGTGGCCACTGAGAA   |
| flavo_7_25 | GGGATCCCTTAGTGTAAAGGCAAT   | roseo_3_25 | CTCTGGTCTTACAGAAAACCCG    | gamma_14_25 | TTGGTCCCGAGGGCACTGCTTACT  |
| flavo_8_1  | CCGGAATAACCGTACTACGGGGCAT  | roseo_4_1  | CGTACCACTCTGGTGTAGTACAG   | gamma_15_1  | TCCGTAGAAGTCCGGGCGGTTGTC  |
| flavo_8_2  | GATGGGAAATACCGTACTACGGGG   | roseo_4_2  | CCACTCTGGTGTAGTACAGGATG   | gamma_15_2  | CCGTAGAAGTCCGGGCGGTTGTC   |
| flavo_8_3  | ATGCGGAAATACCGTACTACGGGGC  | roseo_4_3  | GTACTTCTGGTGTAGTACAGG     | gamma_15_3  | CGTAGAAGTCCGGGCGGTTGTCAG  |
| flavo_8_4  | TGCGGAAATACCGTACTACGGGGCA  | roseo_4_4  | CTGTGTAGTACAGGATGTCAAGG   | gamma_15_4  | GTAGAAGTCCGGGCGGTTGTCAG   |
| flavo_8_5  | ACCGTAAACAGTACCGGAAATACCG  | roseo_4_5  | TGGTGTAGTACAGGATGTCAAGG   | gamma_15_5  | TTTCTGAGAAGTCCGGGCGGTTG   |
| flavo_8_6  | CCGTAATACAGTACCGGAAATACCG  | roseo_4_6  | GAAAGGAACTGACCTCTCTGTAG   | gamma_15_6  | CTTCTGAGAAGTCCGGGCGGTTG   |
| flavo_8_7  | CCGATCCGAAATACCGTACTACGGG  | roseo_4_7  | CCTTAGAGAAGGCAATTTCCACG   | gamma_15_7  | TAGAAGTCCGGGCGGTTGTCAGT   |
| flavo_8_8  | CGGAAATACCGTACTACGGGGCAAT  | roseo_4_8  | CGTGTAGTACAGGATGTCAAGG    | gamma_15_8  | ACTGCTGCTTCCGTAAGAGCTGC   |
| flavo_8_9  | ACGATCCGAAATACCGTACTACGG   | roseo_4_9  | GGGAACGTACCTCTCTGTAGTAG   | gamma_15_9  | CATGCACTGAGTTCAGAGTGA     |
| flavo_8_10 | AACGATCCGAAATACCGTACTACG   | roseo_4_10 | GGGAACGTACCTCTCTGTAGTAG   | gamma_15_10 | CTCCAGGACTTCCCTCCATTTGG   |
| flavo_8_11 | CGAAGGAAATGATCTCTGACCTC    | roseo_4_11 | CGAAGGAACTGACCTCTCTGTAG   | gamma_15_11 | AGAAGTCCGGGCGGTTGTCAGTCC  |
| flavo_8_12 | CGAATACCGTACTACGGGGCAAT    | roseo_4_12 | CCGAAGGAACTGACCTCTCTGTAG  | gamma_15_12 | TCTTCCAGGACTTCCCTCCATTTGG |
| flavo_8_13 | CCGAAGGAAATGATCTCTGACCTC   | roseo_4_13 | CTCCGGAAGGAACTGACCTCTCTG  | gamma_15_13 | CTCAGGACTTCCCTCCATTTGG    |
| flavo_8_14 | CTCATCTCTGACCTGTCAATATGC   | roseo_4_14 | CCGGAAGGAACTGACCTCTCTG    | gamma_15_14 | CTCATGAGTCCCTCCATTTGG     |
| flavo_8_15 | TCCGAAGGAAATGATCTCTGACCT   | roseo_4_15 | CTCCGGAAGGAACTGACCTCTCT   | gamma_15_15 | TCTTCCGTAAGAGTCCGGGCGGTT  |
| flavo_8_16 | TCAAAGGAGGTTTCCATACGGGGTG  | roseo_4_16 | GCTGCCGGAAGGAACTGACCTCT   | gamma_15_16 | GCCGCACTGGTATAAATCAAGGCT  |
| flavo_8_17 | GGCTTAAAGGTTTCCATACGGGGTG  | roseo_4_17 | ACTGCTGCCGGAAGGAACTGACCT  | gamma_15_17 | TGCGCACTGGTATAAATCAAGGCT  |
| flavo_8_18 | CTGGGCTATTTCCCTGTACAAGGGA  | roseo_4_18 | CTGGTCCCGGAAGGAACTGACCA   | gamma_15_18 | TCTTCCGAGCTTCCCTCCATTTG   |
| flavo_8_19 | GAAAGGAAAGTACTCTGACCTCTG   | roseo_4_19 | CCGAAGGAACTGACCTCTCTG     | gamma_15_19 | GTTCCAGACTCAATTCGAGTACG   |
| flavo_8_20 | GCCGGAAGGAAAGTACTCTGACCT   | roseo_4_20 | TGGTCCCGGAAGGAACTGACCT    | gamma_15_20 | CCAGTCCGCTTGGCAACCGTTT    |
| flavo_8_21 | GTACAAGGAGGTTTCCATACCGGGT  | roseo_4_21 | CTTAGAGAAGGCAATTTCCACGCG  | gamma_15_21 | TGAGACTTCCCTCCATTTGGGTA   |
| flavo_8_22 | TGTACAAGGAGGTTTCCATACCGGG  | roseo_4_22 | GAAGGCGGCTGACTTGCATGTA    | gamma_15_22 | GCTGCGCACTGGATAAATCAAGG   |
| flavo_8_23 | CTGGGCTATTTCCCTGTACAAGGC   | roseo_4_23 | CACCTGCTCCCGGAAGGAACTGAC  | gamma_15_23 | GCCCACTGGTATAAATCAAGGCT   |
| flavo_8_24 | ACAAGGCAAGGTTCCATACCGGGTGC | roseo_4_24 | TCCCTGCTCCCGGAAGGAACTGAC  | gamma_15_24 | CTGCGCACTGGATAAATCAAGG    |
| flavo_8_25 | CAGGAGTGTCTTACAGCGGTTGGCAG | roseo_4_25 | TCCCGGAAGGAACTGACCTCTCT   | gamma_15_25 | TTTCTCGAGTTCCTCCCTCACT    |
| flavo_9_1  | ATTCCGCTACTTCAATACAACCTCA  | roseo_5_1  | GTCACTATGTCGGAAGGAAAGCTC  | gamma_16_1  | TTTAAGGGTTTGGCTCCAGCTCGG  |
| flavo_9_2  | TTCCGCTACTTCAATACAACCTCA   | roseo_5_2  | CGAAGGAAAGGCTGATCTCTCAGG  | gamma_16_2  | TTTTAAGGGTTTGGCTCCAGCTCG  |
| flavo_9_3  | TATTCGCTACTTCAATACAACCTCA  | roseo_5_3  | TGTCATATGTCGGAAGGAAAGCTC  | gamma_16_3  | TTAAGGGTTTGGCTCCAGCTCGG   |
| flavo_9_4  | TCCGCTACTTCAATACAACCTCAAG  | roseo_5_4  | TCCGGAAGGAAAGGCTGATCTCTCA | gamma_16_4  | GTTTTAAGGGTTTGGCTCCAGCTCG |
| flavo_9_5  | CATATTCGCTACTTCAATACAAC    | roseo_5_5  | TCATATGTCGGAAGGAAAGCTG    | gamma_16_5  | CACGCGGTACTCTGGATCAGGGT   |
| flavo_9_6  | CCGCTACTTCAATACAACCTCAAG   | roseo_5_6  | CCGGAAGGAAAGGCTGATCTCTCA  | gamma_16_6  | ACACCGGTTACTCTGGATCAGGGT  |
| flavo_9_7  | CGCTACTTCAATACAACCTCAAGT   | roseo_5_7  | CTGCTACTATGTCGGAAGGAAAGC  | gamma_16_7  | CTTCCCGGGTTTCCACCGGAGT    |
| flavo_9_8  | GAATCAGGTTCCGGAACAGCTAGT   | roseo_5_8  | GTCCGGAAGGAAAGGCTGATCTCT  | gamma_16_8  | TCTCCCGGGTTTCCACCGGAGT    |
| flavo_9_9  | TCAGAATCAAGTCCGGAACAGCT    | roseo_5_9  | GGCTGATCTCTAGGTTGTCATAGG  | gamma_16_9  | CTTCCACACCGGTTACTCTGGAT   |
| flavo_9_10 | ACTCAAGTCCGGAACAGCTAGT     | roseo_5_10 | TGACTGACTTCTCCGCTTACAGT   | gamma_16_10 | CACACCGGTTACTCTGGATCAGG   |
| flavo_9_11 | GTGGCTTCAATAATACCTAGGAG    | roseo_5_11 | CTGACTGACTTACTCCGCTTACAGT | gamma_16_11 | ACACACCGGTTACTCTGGATCAGG  |
| flavo_9_12 | AGAACTCAAGTCCGGAACAGCTAG   | roseo_5_12 | CGAGGAAAGGCTGATCTCTCAGT   | gamma_16_12 | CACACCGGTTACTCTGGATCAGG   |
| flavo_9_13 | CTAAAGTCCGGAACAGCTAGTATC   | roseo_5_13 | CACATGTCGGAAGGAAAGCTGGA   | gamma_16_13 | CTTCTCCGGTTTCCACCGGAGT    |
| flavo_9_14 | AACCAAGTCCGGAACAGCTAGTATC  | roseo_5_14 | GACCTGTCATGTTCCGGAAGGAA   | gamma_16_14 | TTCTCCGGTTTCCACCGGAGT     |
| flavo_9_15 | GAAACTCAAGTCCGGAACAGCTA    | roseo_5_15 | CTGTACTATGTTCCGGAAGGAAAG  | gamma_16_15 | CTTCCGGTTTCCACCGGAGT      |
| flavo_9_16 | CTAGAATCAAGTCCGGAACAGC     | roseo_5_16 | CTATGTCGGAAGGAAAGCTGATC   | gamma_16_16 | TTCACACCGGTTACTCTGGATC    |
| flavo_9_17 | TCAGGTTCCGGAACAGCTAGTATCC  | roseo_5_17 | ATGTCGGAAGGAAAGCTGATCTC   | gamma_16_17 | CGCTTCTCCGGTTTCCACCGG     |
| flavo_9_18 | GCTCAGAATCAAGTCCGGAACAG    | roseo_5_18 | AGCACCTGCTACTATGTCGGAAGG  | gamma_16_18 | CTCCGGTTTCCACCGGAGTCTCC   |



|             |                              |              |                            |             |                              |
|-------------|------------------------------|--------------|----------------------------|-------------|------------------------------|
| flavo_9_19  | CTACATATCCGGCTACTTCAATAC     | roseo_5_19   | CAGCACCTGTACTATGTCCGGAAG   | gamma_16_19 | CGGGTACTCTGGATCAGGGTTGCC     |
| flavo_9_20  | GCTACTTCAATAACAACCTCAAGATG   | roseo_5_20   | CCTCCGAAGAGGTTAGCGACCGGCC  | gamma_16_20 | GGTATACCTGGATCAGGGTTGCC      |
| flavo_9_21  | TACACGTAAAGGCTTATCTTCTGTT    | roseo_5_21   | TCGGTGCCTCCTCCGAAGAGGTTA   | gamma_16_21 | GGTATACCTGGATCAGGGTTGCC      |
| flavo_9_22  | CACGTAAAGGCTTATCTTCTGTTAT    | roseo_5_22   | CGCGTGCCTCCTCCGAAGAGGTTAG  | gamma_16_22 | TCTTACACACCGGGTATACCTGGGA    |
| flavo_9_23  | ACACGTAAAGGCTTATCTTCTGTTA    | roseo_5_23   | TGTCGGGAAGGAAAGCTGATCTCT   | gamma_16_23 | TCACACACCGGGTATACCTGGTACA    |
| flavo_9_24  | CTTAGCCGCTCAGAACTCAAGGTTCC   | roseo_5_24   | CGCTGTACTATGTCCGAAGGAA     | gamma_16_24 | GCCTTCTCCGGGTTTACCSSGCA      |
| flavo_9_25  | CGCTAGCAACTAAGGTTCCGGAACA    | roseo_5_25   | CGACCACTGTACTATGTCCGGAAG   | gamma_16_25 | CGGGTATACCTGGATCAGGGTTGCC    |
| flavo_10_1  | GCCTTAGCCACTCATCAACCAATG     | roseo_6_1    | GATAAACACTAGTCTTCTAGGCGG   | gamma_17_1  | GGCTTCCAATAGTGTACCGGTTCC     |
| flavo_10_2  | TCTTCGGTTAGCCACTCATCAACCA    | roseo_6_2    | CCGAGGCTATCCGAAGCAAAAGGT   | gamma_17_2  | AGGCTCTCCAATAGTGTACCGGTTCC   |
| flavo_10_3  | ACAGTGTCCGAGTGTCTTCTCTGTT    | roseo_6_3    | CCGAGGCTATCCGAAGCAAAAGGT   | gamma_17_3  | CAGGCTCTCCAATAGTGTACCGGTTCC  |
| flavo_10_4  | CCCGTGGCCACTCGTCAITCTGGT     | roseo_6_4    | AAAACCTAGTCTCTAGGCGGTGAG   | gamma_17_4  | CATGTATTAGGCTGGCCGCAACGT     |
| flavo_10_5  | ACCCGTGGCCACTCGTCAITCTGGT    | roseo_6_5    | AAAACCTAGTCTCTAGGCGGTGAG   | gamma_17_5  | GCTCTCCAATAGTGTACCGGTTCCGA   |
| flavo_10_6  | ACCCGTGGCCACTCGTCAITCTGGT    | roseo_6_6    | TCCCGAGGCTATCCGAAGCAAAAG   | gamma_17_6  | GCAGGCTCTCTCAATAGTGTACCGGTT  |
| flavo_10_7  | TACAACCCGTAGGGCTTTCATCTCTG   | roseo_6_7    | CTAGTCTCTAGGCGGTGAGAGAT    | gamma_17_7  | CGCTGAGAGCAAGTCCCATCTGTT     |
| flavo_10_8  | ACAACCCGTAGGGCTTTCATCTCTG    | roseo_6_8    | ACTAGTCTCTAGGCGGTGAGAG     | gamma_17_8  | ACGCTGAGAGCAAGTCCCATCTGTT    |
| flavo_10_9  | AACCCGTAGGGCTTTCATCTCTG      | roseo_6_9    | CCTAGTCTCTAGGCGGTGAGAG     | gamma_17_9  | GCTGAGAGCAAGTCCCATCTGTT      |
| flavo_10_10 | CAGTTTACAACCCGTAGGGCTTTC     | roseo_6_10   | TAGTCTCTAGGCGGTGAGAGGATG   | gamma_17_10 | GACCGTGAAGCAAGTCCCATCTG      |
| flavo_10_11 | CAACCCGTAGGGCTTTCATCTCTG     | roseo_6_11   | CCTCTCAAACAGCTACTGATCGCA   | gamma_17_11 | AATCTCACCGAGGCTCTCTCAATG     |
| flavo_10_12 | TTACAACCCGTAGGGCTTTCATCTCT   | roseo_6_12   | CTCTCAAACAGCTACTGATCGCG    | gamma_17_12 | GCATATTAGGCTGGCCGCAACG       |
| flavo_10_13 | AGCAGTTTACAACCCGTAGGGCTTTC   | roseo_6_13   | CTCTCAAACAGCTACTGATCGGAG   | gamma_17_13 | CTAATCTCACCGAGGCTCTCTCAAT    |
| flavo_10_14 | GCAGTTTACAACCCGTAGGGCTTTC    | roseo_6_14   | CTCAAACAGCTACTGATCGGAGCT   | gamma_17_14 | GCTAATCTCACCGAGGCTCTCTCAAT   |
| flavo_10_15 | AAGCAGTTTACAACCCGTAGGGCTTTC  | roseo_6_15   | CAGTACTGATCGGAGCTTGGTAT    | gamma_17_15 | GCAGGCTGAGAGCAAGTCCCATCT     |
| flavo_10_16 | CACGTGGAGTGTCTTCTCTGTTAT     | roseo_6_16   | CCAGTACTGATCGGAGCTTGGTAT   | gamma_17_16 | CCTGAGAGCAAGTCCCATCTGTTT     |
| flavo_10_17 | TGGCCACTCGTCAITCTGGTCAAG     | roseo_6_17   | CCAGTACTGATCGGAGCTTGGTAT   | gamma_17_17 | CTCTCCAATAGTGTACCGGTTCCGA    |
| flavo_10_18 | CCGTGGCCACTCGTCAITCTGGTCA    | roseo_6_18   | CCAGTACTGATCGGAGCTTGGTAT   | gamma_17_18 | ATCCTGAGAGCAAGTCCCATCTG      |
| flavo_10_19 | CGGCCACTCGTCAITCTGGTCAAG     | roseo_6_19   | AACCACTGATCGGAGCTTGGTAT    | gamma_17_19 | GCAGGCTCTCCAATAGTGTACCGG     |
| flavo_10_20 | GGTGGCCACTCGTCAITCTGGTCA     | roseo_6_20   | ACCAGTACTGATCGGAGCTTGG     | gamma_17_20 | AGCTAATCTCACCGAGGCTCTCTCA    |
| flavo_10_21 | GTGGCCACTCGTCAITCTGGTCAAG    | roseo_6_21   | GCATGAGCACTGTACTGTGTA      | gamma_17_21 | TCGACGCTGAGAGCAAGTCCCAT      |
| flavo_10_22 | GTTTACAACCCGTAGGGCTTTCATCT   | roseo_6_22   | AGTITTCGAGGCTATCCGAAGCAA   | gamma_17_22 | CTGAGAGCAAGTCCCATCTGTTT      |
| flavo_10_23 | TTTACAACCCGTAGGGCTTTCATCT    | roseo_6_23   | GTTTCCGAGGCTATCCGAAGCAA    | gamma_17_23 | TGATTAGGCTGGCCGCAACGTTT      |
| flavo_10_24 | GCACCCGTGGCCACTCGTCAITCTG    | roseo_6_24   | GGCGGTGAGAGGATGTCAAGGGTT   | gamma_17_24 | TGATTAGGCTGGCCGCAACGTTT      |
| flavo_10_25 | GCGAAGTGGCTCTTGTGATCCCGG     | roseo_6_25   | AGCGGTGAGAGGATGTCAAGGGTT   | gamma_17_25 | GCACCCGCTGAGAGCAAGTCCCAT     |
| flavo_11_1  | TACAAGTACTTATGTGCCCTTC       | alpha_4_1    | CGCAGGCTGAGGTTGCCAACAACTA  | gamma_19_1  | GAGGTTGGACCTTGTGTCTTCCC      |
| flavo_11_2  | CGCCGGGACTTTCATAAAAACCT      | alpha_4_2    | CGCAGGCTGAGGTTGCCAACAACTA  | gamma_19_2  | CGCAGGCTGAGGACTTGTGTCTTCCC   |
| flavo_11_3  | CGGTGGCCATCAAAGTACAAGTACT    | alpha_4_3    | CCGACAGGCTGAGGTTGCCAACAACT | gamma_19_3  | GCGAACTTTCAGAAGGAGGCGTCC     |
| flavo_11_4  | CCGGTGGCCATCAAAGTACAAGTACT   | alpha_4_4    | CAGCAGGCTGAGGTTGCCAACAACTA | gamma_19_4  | AAAGTGGTGAAGGCGCCAGATAAGCT   |
| flavo_11_5  | CGCTCTGACCTAGCTTAATGTGT      | alpha_4_5    | CGCTCTGACCTAGCTTAATGTGT    | gamma_19_5  | TGAGGCGCCAGATAAGTACTACCTA    |
| flavo_11_6  | TCAAGTACTCTTATGTGCTGCTG      | alpha_4_6    | CGCTCTGACCTAGCTTAATGTGT    | gamma_19_6  | GCAAGTGGTGAAGGCGCCAGATAAG    |
| flavo_11_7  | CAGCGGCTGCTGCTGCTGCTG        | alpha_4_7    | CCGCTGCTGACCTATATGTGTGAC   | gamma_19_7  | GTGGTGAAGGCGCCAGATAAGTACT    |
| flavo_11_8  | TGCTCCCTCAGCGCTCAGTAAATGT    | alpha_4_8    | CAGCAGTCTGCTGCAACAACTAGCT  | gamma_19_8  | AGTGTGAGGCGCCAGATAAGTACT     |
| flavo_11_9  | TCACGGGCTCAGCTGATCAGAGT      | alpha_4_9    | ACAGCAGTCTGCTGCAACAACTAGCT | gamma_19_9  | GTGAGGCGCCAGATAAGTACTACCA    |
| flavo_11_10 | TGCCAGTATCAAAGGCACTTCTACC    | alpha_4_10   | TCACCGAGGCTGCTGCAACAACTA   | gamma_19_10 | GGTGAAGGCGCCAGATAAGTACTACCA  |
| flavo_11_11 | ACAAGTACTTATGTGCCCTCGA       | alpha_4_11   | GCATGCTGCAACAACTAGCTTCT    | gamma_19_11 | TGGTGAAGGCGCCAGATAAGTACTACCA |
| flavo_11_12 | GTACATGCAACAGCTAGTGCACCTC    | alpha_4_12   | GGATGCTGCAACAACTAGCTTCT    | gamma_19_12 | AAGTGGTGAAGGCGCCAGATAAGTACT  |
| flavo_11_13 | GCCAGTATCAAAGGCACTTCTACC     | alpha_4_13   | ACCCTGCTGCAACAACTAGCTTCT   | gamma_19_13 | GCCCAGATAAGTACTACCACTTCT     |
| flavo_11_14 | TTCGTCCTCAGCGTCAAGTAAATGT    | alpha_4_14   | CACCGTCTGCAACAACTAGCTTCT   | gamma_19_14 | GCAGGCGCCAGATAAGTACTACCACT   |
| flavo_11_15 | CAAGTACTTATGTGCCCTCGAC       | alpha_4_15   | GTACCCGCAAGGCTGCTGCAAC     | gamma_19_15 | GCAGGCGCCAGATAAGTACTACCACT   |
| flavo_11_16 | CGCCGGTGGCCATCAAAGTACAAGT    | alpha_4_16   | AGGCATGCTGCAACAACTAGCTTCT  | gamma_19_16 | AGCAGGCGCCAGATAAGTACTACCACT  |
| flavo_11_17 | TGCGCGTGGCCATCAAAGTACAAGT    | alpha_4_17   | CTACCCGCTGCAACAACTAGCTTCT  | gamma_19_17 | ACAAGTGGTGAAGGCGCCAGATAAG    |
| flavo_11_18 | GCCCGTGGCCATCAAAGTACAAGT     | alpha_4_18   | TACCCGCTGCAACAACTAGCTTCT   | gamma_19_18 | CACAAGTGGTGAAGGCGCCAGATAAG   |
| flavo_11_19 | TTCGCGTGGCCATCAAAGTACAAGT    | alpha_4_19   | CATGCTGCAACAACTAGCTTCTCA   | gamma_19_19 | CGAGGTTGGACCTTGTCTTCCC       |
| flavo_11_20 | CGTTCGCGGCTGGCCATCAAAGTACA   | alpha_4_20   | GTGCAACAACTAGCTTCTCACTG    | gamma_19_20 | GAGCGGCGCCAGATAAGTACTACCA    |
| flavo_11_21 | GTTCCGCTGGCCATCAAAGTACAAGT   | alpha_4_21   | CGTCAACAACTAGCTTCTCACTG    | gamma_19_21 | CGCGAGGTTGGACCTTGTCTTCCC     |
| flavo_11_22 | TACCTATGCGAGCTTAAAGTGAAGCG   | alpha_4_22   | CTCGGATTCGCTTAACTCTCTCTG   | gamma_19_22 | GACCGTAAAGGCAAGCTTCTATG      |
| flavo_11_23 | TCTCGGAGCTTAAAGTGAAGCGGTTA   | alpha_4_23   | ACTCAACCTGCTGCAACTATATGCT  | gamma_19_23 | TCACAAGTGGTGAAGGCGCCAGATA    |
| flavo_11_24 | CCCTGCTTAAACAAAGCTGCTGGCG    | alpha_4_24   | GGTCAACCTGCTGCAACTATATGCT  | gamma_19_24 | GCAGGCTTAAAGGCAAGCTTCTATG    |
| flavo_11_25 | ACCGTGTGCGGCTAGGATTTCAACCC   | alpha_4_25   | TACTACCCGCTGCAACTATATGCT   | gamma_19_25 | GCAGGCTTAAAGGCAAGCTTCTATG    |
| flavo_12_1  | CGCTTCTGTCGACGCTGATGGCTG     | wolbach_1_1  | GCTCAGGACTTCTTCTGTGAGTACCG | gamma_20_1  | CCACTAAGGCAAAATTCCTCCCAAC    |
| flavo_12_2  | CGCTTCTGTCGACGCTGATGGCTG     | wolbach_1_2  | AGCCAGGACTTCTTCTGTGAGTACCG | gamma_20_2  | CGCCACTAAGGCAAAATTCCTCCCAAC  |
| flavo_12_3  | GCTTCTGTCGACGCTGATGGCTG      | wolbach_1_3  | CCAGGACTTCTTCTGTGAGTACCGT  | gamma_20_3  | CGCCACTAAGGCAAAATTCCTCCCAAC  |
| flavo_12_4  | TTTCTGTCGACGCTGATGGCTG       | wolbach_1_4  | CGGAGTTAGCCAGGACTTCTTCTGT  | gamma_20_4  | CCACTAAGGCAAAATTCCTCCCAACG   |
| flavo_12_5  | TTTCTGTCGACGCTGATGGCTG       | wolbach_1_5  | CGGAGTTAGCCAGGACTTCTTCTGT  | gamma_20_5  | CCACTAAGGCAAAATTCCTCCCAACG   |
| flavo_12_6  | CGCTTCTTCTGCAACGCTGATGGC     | wolbach_1_6  | ACGGAGTTAGCCAGGACTTCTTCTG  | gamma_20_6  | CTAAGGCAAAATTCCTCCCAACGCG    |
| flavo_12_7  | TCTTCTGTCGACGCTGATGGCTG      | wolbach_1_7  | GGAGTTAGCCAGGACTTCTTCTGTG  | gamma_20_7  | CGCCACTAAGGCAAAATTCCTCCCAAC  |
| flavo_12_8  | CACGCTGATGGCTGATCAGAGT       | wolbach_1_8  | GAGGACTTCTTCTGTGAGTACCGT   | gamma_20_8  | GGTACCGTCAAGGCGCGAGTATT      |
| flavo_12_9  | GCCGCTTCTTCTGCAACGCTGATGG    | wolbach_1_9  | GCCAGGAGTTAGCCAGGACTTCTT   | gamma_20_9  | AGGTACCGTCAAGGCGCGAGTATT     |
| flavo_12_10 | TGCCACTTITACCACCGGATTT       | wolbach_1_10 | CCGAGGTTAGCCAGGACTTCTTCT   | gamma_20_10 | TAGTACCGTCAAGGCGCGAGTATT     |
| flavo_12_11 | ATGCCACTTITACCACCGGAGTT      | wolbach_1_11 | TGCCAGGAGTTAGCCAGGACTTCT   | gamma_20_11 | TGCCGCAATAGGCAAAATTCCTCCCA   |
| flavo_12_12 | CACAGCTGACACAGATTTTCTCTG     | wolbach_1_12 | CCGAGGTTAGCCAGGACTTCTTCT   | gamma_20_12 | TAAAGGCAAAATTCCTCCCAACGGCT   |
| flavo_12_13 | GAGACTCGCTTCTCTCGGGAGT       | wolbach_1_13 | CGCTCAGGCTCAGATTTGAACACG   | gamma_20_13 | CTGTAGGTAAGGCAAAATTCCTCCCA   |
| flavo_12_14 | CATGCCACTTITACCACCGGAGT      | wolbach_1_14 | GGCTCAGGCTCAGATTTGAACACCA  | gamma_20_14 | GTAGGTAAGGCAAAATTCCTCCCAAGT  |
| flavo_12_15 | CGGCTTGAAGACTCGCTTCTCT       | wolbach_1_15 | TGGCAGGAGTTAGCCAGGACTTCT   | gamma_20_15 | CTGCGCAATAGGCAAAATTCCTCCCA   |
| flavo_12_16 | CCACACTGGACAGATTTCTCTG       | wolbach_1_16 | CTGTGGCAGGAGTTAGCCAGGACT   | gamma_20_16 | GTGAGTACCGTCAAGGCGCGAGT      |
| flavo_12_17 | TTTGAAGACTCGCTTCTCTCGGG      | wolbach_1_17 | GCTGGCAGGAGTTAGCCAGGACTT   | gamma_20_17 | TCTGTAGGTAAGGCAAAATTCCTCCCA  |
| flavo_12_18 | GGTGAAGACTCGCTTCTCTCGG       | wolbach_1_18 | TGTGGCAGGAGTTAGCCAGGACTT   | gamma_20_18 | GCTGCGCAATAGGCAAAATTCCTCCCA  |
| flavo_12_19 | CTTTGAAGACTCGCTTCTCTCGG      | wolbach_1_19 | CGGCTCAGGCTCAGATTTGAACCC   | gamma_20_19 | CTTGTAGGTAAGGCAAAATTCCTCCCA  |
| flavo_12_20 | TGAAGACTCGCTTCTCTCGGGAG      | wolbach_1_20 | GGCTCAGGCTCAGATTTGAACCC    | gamma_20_20 | TCTTGTAGGTAAGGCAAAATTCCTCCCA |
| flavo_12_21 | GAGCGGCTTGAAGACTCGCTTCTT     | wolbach_1_21 | GCTCAGGCTCAGATTTGAACCC     | gamma_20_21 | GGCAAAATTCCTCCCAACGGCTAGTT   |
| flavo_12_22 | CGGCTTGAAGACTCGCTTCTCTCT     | wolbach_1_22 | TCCGCTCAGGCTCAGATTTGAACCC  | gamma_20_22 | GACAAATTCCTCCCAACGGCTAGTT    |
| flavo_12_23 | GCTTGAAGACTCGCTTCTCTCTG      | wolbach_1_23 | CATGCAACCTGTTGAACCCCGG     | gamma_20_23 | AGCTGGCAACTAGGCAAAATTCCTCCCA |
| flavo_12_24 | ACCCGCTTGAAGACTCGCTTCTCT     | wolbach_1_24 | GACTTGGACCCATTTGAGCCACC    | gamma_20_24 | GACTTGGACCCATTTGAGCCACC      |
| flavo_12_25 | TGCTGACTGACCTCAACTACCCAC     | wolbach_1_25 | CGACTTGGACCCATTTGAGCCACC   | gamma_20_25 | TGCTGACTGACCTCAACTACCCAC     |
| flavo_13_1  | CGCCGGTCTCAGCATAGCAAGCTA     | rickett_1_1  | TCTTGGATCCGCGACCACTAGT     | gamma_21_1  | TGCTGACTGACCTCAACTACCCAC     |
| flavo_13_2  | AGGTGCTCTCAGGTAACGAACCT      | rickett_1_2  | ATCTCTGGATCCGCGACCACTAGT   | gamma_21_2  | CGCTGACCGCAGAGCAAGTCCCG      |
| flavo_13_3  | GCTGCTCTCAGGTAACGAACCT       | rickett_1_3  | TCAGTGTAGCCAGTACGACCGCC    | gamma_21_3  | ACTCTGACCGCAGAGCAAGTCCCG     |
| flavo_13_4  | TAGTCTCTCAGGTAACGAAC         | rickett_1_4  | CAGTGTAGCCAGTACGACCGCC     | gamma_21_4  | AGCAAGTCTCCGCTGTACGCTTGG     |
| flavo_13_5  | AGGACGCTATGATCATCTGTACCCA    | rickett_1_5  | TCAGTGTAGCCAGTACGACCGCC    | gamma_21_5  | GATCGGCAAGCAAGTCTCCGCTG      |
| flavo_13_6  | CTCACGGTAACGAACCTCAGGCACT    | rickett_1_6  | CGTACTGTAGCCAGTACGACCGCC   | gamma_21_6  | GATCGGCAAGCAAGTCTCCGCTG      |
| flavo_13_7  | TGCCAGGTAACGAACCTCAGGCACT    | rickett_1_7  | GTTGAGCCAGTACGACCGCTTGG    | gamma_21_7  | CAAGTCTCCGCTGTACGCTTGGAC     |
| flavo_13_8  | CGTTCGCGGCTGTCAGCATAGCAA     | rickett_1_8  | AGTGTAGCCAGTACGACCGCTTGG   | gamma_21_8  | GCTCCGCTGTACGCTTGGAC         |
| flavo_13_9  | GTCGCTCTCAGGTAACGAACCT       | rickett_1_9  | CGTCTGGATCCGCGACCACT       | gamma_21_9  | CTGGGCTTACATCTCCGACTGACCG    |
| flavo_13_10 | GTCCCGAGTGGCTGCTCATTTGCTC    | rickett_1_10 | GCTGCTGGATCCGCGACCACT      | gamma_21_10 | CTTTTGAAGCAAGTCCCATGGTGT     |
| flavo_13_11 | TAGGACGATAGTCAITCTGTACCC     | rickett_1_11 | CGTCTGGATCCGCGACCACT       | gamma_21_11 | CTTTTGAAGCAAGTCCCATGGTGT     |
| flavo_13_12 | ACCAATATCAAAGGCAAGTTCATCG    | rickett_1_12 | GATCTCTGCAATCCGCGACCACT    | gamma_21_12 | CTTTTGAAGCAAGTCCCATGGTGT     |
| flavo_13_13 | TCTCAGGTAACGAACCTCAGGCACT    | rickett_1_13 | TGTAGCCAGTACGCGCTTGG       | gamma_21_13 | TTTTGAAGCAAGTCCCATGGTGT      |
| flavo_13_14 | CTAGGCTGCTCCTCAGGTAACGAA     | rickett_1_14 | AGGCTGCTTGTAGCCAGGATGACC   | gamma_21_14 | TTTTGAAGCAAGTCCCATGGTGT      |
| flavo_13_15 | CTCTCAGGTAACGAACCTCAGGCACT   | rickett_1_15 | CCACTAATAATTTGAGCAAGCCCC   | gamma_21_15 | CCTCAGGCTCAGTATGTCCGAGAA     |
| flavo_13_16 | CGGCTGCGGCTGTCAGCATAGCAA     | rickett_1_16 | GGCACTAATAATTTGAGCAAGCCCC  | gamma_21_16 | GGGCTTTCACATCCGACTGACCGGTT   |
| flavo_13_17 | GTTCCGCGGCTGTCAGCATAGCAA     | rickett_1_17 | CAAGCCCAATAGTCCGCTGACT     | gamma_21_17 | CTTTCACATCCGACTGACCGGTT      |
| flavo_13_18 | TCTCAGGTAACGAACCTCAGGCACT    | rickett_1_18 | CGCTTGTCTTCCCTGTAAACAC     | gamma_21_18 | GGCTTTCACATCCGACTGACCGGTT    |
| flavo_13_19 | TGCTCTCAGGTAACGAACCTCAGGCACT | rickett_1_19 | CGCTTGTCTTCCCTGTAAACAC     | gamma_21_19 | CAGCTGACCGCAGAGCAAGCTCCG     |
| flavo_13_20 | GGTCCGCAAGGCTGCTCATTTGCTC    | rickett_1_20 | CTTGGGATCCGCGACCACTAGT     | gamma_21_20 | GCTTTCACATCCGACTGACCGGTT     |
| flavo_13_21 | CGGCAATAGTGGTTCAGAGTTGCT     | rickett_1_21 | AGCAAGCCCAATAGTCCGTTCCG    | gamma_21_21 | TCAGGCAAGGCAAGTCCGCTGCT      |
| flavo_13_22 | TGCTAGTGGTTCAGAGTTGCT        | rickett_1_22 | GCAAGCCCAATAGTCCGTTCCG     | gamma_21_22 | CTCAGGCAAGGCAAGTCCGCTGCT     |
| flavo_13_23 | CGGCAATAGTGGTTCAGAGTTGCT     | rickett_1_23 | TGTAGCCAGTACGCGCTTCCG      | gamma_21_23 | AGAGCAAGTCCGCTTGTACCTT       |
| flavo_13_24 | CGGCAATAGTGGTTCAGAGTTGCT     | rickett_1_24 | GAGCAAGCCCAATAGTCCGTTCCG   | gamma_21_24 | AGCTCCGCTGTTCAGCTTGTACCT     |
| flavo_13_25 | GATAGTGGTTCAGAGTTGCT         | rickett_1_25 | GAAGCAAGCTTCTGCGATCCGCG    | gamma_21_25 | CAGGCAAGTCCGCTTGTACCTT       |
| flavo_14_1  | GTCAGGCAAGTCTGTTACCCCTCG     | alpha_5_1    | AAACAAAGCCCTGTGGGCGCTAGCA  | verru_1_1   | CCGCAAGTTCACACTCCACTCAGATC   |
| flavo_14_2  | AGTGAAGCAAGTCTGTTACCCCTCG    | alpha_5_2    | CACAAAGCCCTGTGGGCGCTAGCA   | verru_1_2   | CCGCAAGTTCACACTCCACTCAGATC   |
| flavo_14_3  | GCAAGCAAGTCTGTTACCCCTCG      | alpha_5_3    | CACAAAGCCCTGTGGGCGCTAGCA   | verru_1_3   | CCGCAAGTTCACACTCCACTCAGATC   |
| flavo_14_4  | TGCAAGCAAGTCTGTTACCCCTCG     | alpha_5_4    | ACCTATGTTAGTCCCAACGCGTT    | verru_1_4   | CACCTCACACTCTATCCGCTACG      |
| flavo_14_5  | CAAGCAAGTCTGTTACCCCTCG       | alpha_5_5    | CACCTATGTTAGTCCCAACGCGTT   | verru_1_5   | TTACACTCACACTCTATCCGCTACG    |

|             |                            |            |                            |            |                           |
|-------------|----------------------------|------------|----------------------------|------------|---------------------------|
| flavo_14_6  | AAGCACTCTGTTACCCCTCGACTT   | alpha_5_6  | GCACCTATGGTAGATCCCCACGG    | verru_1_6  | ACACCTCACACATCTATCCGCCTAC |
| flavo_14_7  | AGCACTCTGTTACCCCTCGACTTG   | alpha_5_7  | CCGCACCCATGGTAGATCCCCACG   | verru_1_7  | CACACCTCACACATCTATCCGCCTA |
| flavo_14_8  | GCACTCTGTTACCCCTCGACTTGC   | alpha_5_8  | CGCACCCATGGTAGATCCCCACGC   | verru_1_8  | GCCCCGAGATTTCACACCTCACACA |
| flavo_14_9  | TGCTACACGTAGCAGTGTCTTCTCC  | alpha_5_9  | TATTCGGACCCATGGTAGATCCCG   | verru_1_9  | ACCTCACACATCTATCCGCCTACGC |
| flavo_14_10 | CCCGTGGCCGGTCTGTCAGCGAGTG  | alpha_5_10 | ATTCCGACCCCTATGGTAGATCCCC  | verru_1_10 | AGCCCCGAGATTTCACACCTCACAC |
| flavo_14_11 | TCGTCAGCGGAGTGAAGCACTCTCTG | alpha_5_11 | TCCGACCCCTATGGTAGATCCCCAC  | verru_1_11 | CTCCCGAAGGATGACCTACGTA    |
| flavo_14_12 | TGCGCCGGTCTGTCAGCGAGTGCAAG | alpha_5_12 | CGCACCAAGCTTGGGTTGATCCCAA  | verru_1_12 | CTGCTCCCGAAGGATGACCTACG   |
| flavo_14_13 | CGGTCTGTCAGCGAGTGAAGCACTC  | alpha_5_13 | TTCCGACCCCTATGGTAGATCCCCA  | verru_1_13 | GGCTATGAAGCTTCTGTTGCTCT   |
| flavo_14_14 | CCGTGCGCCGGTCTGTCAGCGAGTGC | alpha_5_14 | CCACCAAGCCCTTGGGCCCCTAGC   | verru_1_14 | CCTCCCGAAGGATGACCTACGTA   |
| flavo_14_15 | GCGCCGGTCTGTCAGCGAGTGAAGCA | alpha_5_15 | CCCTATGGTAGATCCCCACGGCTTA  | verru_1_15 | CCTCCCGAAGGATGACCTACGTA   |
| flavo_14_16 | GGTCGTGTCAGCGAGTGAAGCACTCC | alpha_5_16 | CCTATGGTAGATCCCCACGGCTTAC  | verru_1_16 | TCCCGAAGGATGACCTACGTA     |
| flavo_14_17 | GCCGGTCTGTCAGCGAGTGAAGCA   | alpha_5_17 | GCCACCAAGCTTGGGTTGATCCAA   | verru_1_17 | GAGGCTATGAACCTCTCTGTTGCTC |
| flavo_14_18 | GTCAGCGAGTGAAGCACTCTCTGTT  | alpha_5_18 | GCACCAAGCTTGGGTTGATCCAACT  | verru_1_18 | GACGCTGCTCCCGAAGGATGAC    |
| flavo_14_19 | CCGGTCTGTCAGCGAGTGAAGCACT  | alpha_5_19 | AGCCACCAAGCTTGGGTTGATCCA   | verru_1_19 | AGGCTATGAACCTCTCTGTTGCTCC |
| flavo_14_20 | TCAGCGAGTGAAGCACTCTCTGTTA  | alpha_5_20 | CTATGGTAGATCCCCACGGTACG    | verru_1_20 | GCTCCCGAAGGATGACCTACGTA   |
| flavo_14_21 | CGTGCCGGTCTGTCAGCGAGTGA    | alpha_5_21 | GCCACCAAGCCCTGTTGGCCCTAG   | verru_1_21 | CGCTGCTCCCGAAGGATGAC      |
| flavo_14_22 | GCCGGTCTGTCAGCGAGTGAAGCA   | alpha_5_22 | CACCAAGCTTGGGTTGATCCAACTC  | verru_1_22 | TGCTCCCGAAGGATGACCTAC     |
| flavo_14_23 | GTCGCGCGTCTGTCAGCGAGTGA    | alpha_5_23 | TAGCGCACAGCTTGGGTTGATCC    | verru_1_23 | ACGCTGCTCCCGAAGGATGAC     |
| flavo_14_24 | CGTCAGCGAGTGAAGCACTCTCTGT  | alpha_5_24 | CAAAGCCCTGTTGGGCCCTAGCAGCT | verru_1_24 | GCTGCTCCCGAAGGATGACCTAC   |
| flavo_14_25 | GTCTGTCAGCGAGTGAAGCACTCTCT | alpha_5_25 | GCCACCAAGCCCTGTTGGGCCCTA   | verru_1_25 | AGGACGCTGCTCCCGAAGGATG    |
| flavo_15_1  | GGCGTACTCCAGGTGCATCACTT    | alpha_6_1  | GCGCACTAACCCCGAAGCTTCTGTT  | verru_2_1  | CGTGCATGTTACACATTTCTGTA   |
| flavo_15_2  | CTCCCAAGGTGCATCACTTAATACT  | alpha_6_2  | CTTCTGCGAGTAGTGTCCCACTGT   | verru_2_2  | CTACCTTAACCTTCTGCTCATGAG  |
| flavo_15_3  | GCGTACTCCAGGTGCATCACTTA    | alpha_6_3  | CCCAGCTTGTGGGCCATGAGGACT   | verru_2_3  | ACCCTAACCTTCTGCTCATGAGG   |
| flavo_15_4  | CGGGTACTCCCAAGGTGCATCACT   | alpha_6_4  | ATCTTCTGCGAGTAGTGTCCCACT   | verru_2_4  | CGCTGCATGTTACACATTTCTG    |
| flavo_15_5  | ACTCCCAAGGTGCATCACTTAATAC  | alpha_6_5  | TCTTCTTGGGAGTAGTGTCCCACTG  | verru_2_5  | CAAGTGTCCCTTCTCCCTCCAG    |
| flavo_15_6  | CGTACTCCCAAGGTGCATCACTTAA  | alpha_6_6  | TAGCCCAAGCTTGTGGGCCATGAGG  | verru_2_6  | TACACCAAGTGTCCCTTCTCCCT   |
| flavo_15_7  | CGGGCTACTCCCAAGGTGCATCAC   | alpha_6_7  | GCACCTAACCCCGAAGCTTCTGTTG  | verru_2_7  | CCAAGTGTCCCTTCTCCCTCCAG   |
| flavo_15_8  | GTACTCCCAAGGTGCATCACTTAAT  | alpha_6_8  | GTAGCCCAAGCTTGTGGGCCATGAG  | verru_2_8  | ACACCAAGTGTCCCTTCTCCCTC   |
| flavo_15_9  | GCCGGCTACTCCCAAGGTGCATCA   | alpha_6_9  | CGCCACTAACCCCGAAGCTTCTGTT  | verru_2_9  | CGCTACACCAAGTGTCCCTTCTCC  |
| flavo_15_10 | GAAGAGAAGGCCCTGTTTCCAAGCCG | alpha_6_10 | TCTTGGGAGTAGTGTCCCACTGTC   | verru_2_10 | CACCAAGTGTCCCTTCTCCCTCC   |
| flavo_15_11 | CAACAGGAGTGTATGATCGTTTACG  | alpha_6_11 | TAGCATCTTCTTGGGAGTAGTGTCC  | verru_2_11 | GCTACACCAAGTGTCCCTTCTCC   |
| flavo_15_12 | GCATGCCCATCTCATACCGAAAAAAC | alpha_6_12 | AGCATCTTCTTGGGAGTAGTGTCC   | verru_2_12 | CTACACCAAGTGTCCCTTCTCC    |
| flavo_15_13 | TTGTAATCTGCTCCGAAGAGAAAGGC | alpha_6_13 | GCCCAGCTTGTGGGCCATGAGGAC   | verru_2_13 | AGTGTCCCTTCTCCCTCCAGTAC   |
| flavo_15_14 | CGCCGGTCTGTCAGCAAAAGCAAGCT | alpha_6_14 | CACTAACCCCGAAGCTTCTGTTGAC  | verru_2_14 | AAGTGTCCCTTCTCCCTCCAGTA   |
| flavo_15_15 | AAGAGAAGGCCCTGTTTCCAAGCCGG | alpha_6_15 | CATCTTCTTGGGAGTAGTGTCCAC   | verru_2_15 | ACCAAGTGTCCCTTCTCCCTTCCA  |
| flavo_15_16 | GCCGGTCTGTCAGCAAAAGCAAGCTT | alpha_6_16 | TGTAGCCCAAGCTTGTGGGCCATGA  | verru_2_16 | GCTACCTTAACCTTCTGCTCATGAG |
| flavo_15_17 | TGCCGGGCTACTCCCAAGGTGCATC  | alpha_6_17 | AGCCCAAGCTTGTGGGCCATGAGGA  | verru_2_17 | GTTCCCTTCTCCCTCCAGTACTCT  |
| flavo_15_18 | GCGCCGGTCTGTCAGCAAAAGCAAGC | alpha_6_18 | CCTAACCCCGAAGCTTCTGTTGCA   | verru_2_18 | GTTGTTCCCTTCTCCCTCCAGTACT |
| flavo_15_19 | CGAAGAGAAGGCCCTGTTTCCAAGCC | alpha_6_19 | GCATCTTCTTGGGAGTAGTGTCCCA  | verru_2_19 | TGTTCCCTTCTCCCTCCAGTACT   |
| flavo_15_20 | CCAACAGCGAGTGTATGATCGTTTAC | alpha_6_20 | GTTGAGCCCAAGCTTGTGGGCCATG  | verru_2_20 | CCGCTACACCAAGTGTCCCTTCT   |
| flavo_15_21 | GGAGTATTAATCCCGTTTCCAGGG   | alpha_6_21 | TGCGCCACTAACCCCGAAGCTTCTG  | verru_2_21 | TTCCTTCTCCCTCCAGTACTCTA   |
| flavo_15_22 | TGGAGTATTAATCCCGTTTCCAGG   | alpha_6_22 | CTAACACCAAGTGTCCCGAACAGC   | verru_2_22 | GGGCTGCATGTTACACATTTCTG   |
| flavo_15_23 | TCCCGTTTCCAGGGCTATCTCTCC   | alpha_6_23 | CGAGCTTGTGGGCCATGAGGACTT   | verru_2_23 | CGCTACCTAACCTTCTGCTCATG   |
| flavo_15_24 | TGCCCGGTCTGTCAGCAAAAGCAAG  | alpha_6_24 | ACTAACCCCGAAGCTTCTGTTGACT  | verru_2_24 | CCTAACCTTCTGCTCATGAGGCTA  |
| flavo_15_25 | AACAGCGAGTGTATGATCGTTTACGG | alpha_6_25 | TCTTGGGAGTAGTGTCCCACTGTA   | verru_2_25 | ACCGCTACACCAAGTGTCCCTTCT  |

Supplemental Table 2: presence of identified amino acid transporters, extracellular nucleases, and nucleoside and fatty acid transport in 115 genomes of marine bacterial isolates. Word searches performed with Joint Genome Institute's Integrated Microbial Genomes (IMG) online at <http://img.jgi.doe.gov/>.

| Genome                                     | Amino acid transport | Extracellular nuclease or nucleoside transport | Fatty acid transport |
|--------------------------------------------|----------------------|------------------------------------------------|----------------------|
| Agreia sp. PHSC20C1                        | +                    | -                                              | -                    |
| Algoriphagus sp. PR1                       | +                    | +                                              | +                    |
| Alcanivorax sp. DG881                      | +                    | -                                              | -                    |
| Alteromonas macleodii ATCC 27126           | +                    | +                                              | +                    |
| Alteromonas macleodii Deep DSM 17117       | +                    | +                                              | +                    |
| Aurantimonas sp. S185-9A1                  | +                    | -                                              | -                    |
| Bacillus sp. B14905                        | +                    | +                                              | -                    |
| Bacillus sp. NRRL B-14911                  | +                    | +                                              | -                    |
| Bacillus sp. SG-1                          | +                    | +                                              | -                    |
| Beggiatoa sp. PS                           | +                    | -                                              | +                    |
| Bermanella marisrubri                      | +                    | -                                              | +                    |
| Blastopirellula marina DSM 3645            | +                    | +                                              | -                    |
| Caminibacter mediatlanticus TB-2           | +                    | -                                              | -                    |
| Candidatus Blochmannia pennsylvanicus BPEN | +                    | -                                              | -                    |
| Candidatus Pelagibacter ubique HTCC1002    | +                    | -                                              | -                    |
| Carnobacterium sp. AT7                     | +                    | +                                              | +                    |
| Congregibacter litoralis KT71              | +                    | +                                              | -                    |
| Croceibacter atlanticus HTCC2559           | +                    | +                                              | -                    |
| Cyanothece sp. CCY 0110                    | +                    | +                                              | -                    |
| Dokdonia donghaensis MED134                | +                    | +                                              | -                    |
| Erythrobacter litoralis HTCC2594           | +                    | +                                              | +                    |
| Erythrobacter sp. NAP1                     | +                    | -                                              | -                    |
| Erythrobacter sp. SD-21                    | +                    | +                                              | -                    |
| Finegoldia magna ATCC 29328                | +                    | -                                              | -                    |
| Flavobacteria bacterium BAL38              | +                    | -                                              | +                    |
| Flavobacteria bacterium BBFL7              | -                    | -                                              | -                    |
| Flavobacteriales bacterium ALC-1           | +                    | +                                              | -                    |
| Flavobacteriales bacterium HTCC2170        | +                    | +                                              | -                    |
| Fulvimarina pelagi HTCC2506                | +                    | -                                              | +                    |
| Hoeflea phototrophica DFL-43               | +                    | -                                              | +                    |
| Hydrogenivirga sp. 128-5-R1-1              | +                    | -                                              | -                    |
| Idiomarina baltica OS145                   | +                    | +                                              | +                    |
| Janibacter sp. HTCC2649                    | +                    | -                                              | -                    |
| Kordia algicida OT-1                       | +                    | +                                              | +                    |
| Labrenzia aggregata IAM 12614              | +                    | -                                              | -                    |
| Leeuwenhoekiella blandensis MED217         | +                    | +                                              | -                    |

|                                       |   |   |   |
|---------------------------------------|---|---|---|
| Lentisphaera araneosa HTCC2155        | + | - | + |
| Limnobacter sp. MED105                | + | - | + |
| Loktanella vestfoldensis SKA53        | + | - | - |
| Lyngbya sp. PCC 8106                  | + | + | - |
| marine gamma proteobacterium HTCC2080 | + | + | + |
| marine gamma proteobacterium HTCC2143 | + | - | - |
| marine gamma proteobacterium HTCC2148 | + | - | - |
| marine gamma proteobacterium HTCC2207 | + | - | - |
| Marinobacter algicola DG893           | + | + | + |
| Marinobacter sp. ELB17                | + | - | + |
| Marinomonas sp. MED121                | + | + | - |
| Mariprofundus ferrooxydans PV-1       | + | - | + |
| Methylophilales bacterium HTCC2181    | - | - | - |
| Microscilla marina ATCC 23134         | + | + | - |
| Moritella sp. PE36                    | + | + | + |
| Neptuniibacter caesariensis           | + | - | - |
| Nisaea sp. BAL199                     | + | - | + |
| Nitrobacter sp. Nb-311A               | + | - | - |
| Nitrococcus mobilis Nb-231            | + | - | - |
| Nodularia spumigena CCY9414           | + | - | - |
| Oceanibulbus indolifex HEL-45         | + | + | + |
| Oceanicaulis alexandrii HTCC2633      | + | - | - |
| Oceanicola batsensis HTCC2597         | + | + | - |
| Oceanicola granulosus HTCC2516        | + | + | - |
| Parvularcula bermudensis HTCC2503     | + | + | - |
| Pedobacter sp. BAL39                  | + | - | + |
| Pelotomaculum thermopropionicum SI    | + | - | - |
| Phaeobacter gallaeciensis 2.10        | + | - | - |
| Phaeobacter gallaeciensis BS107       | + | - | - |
| Photobacterium angustum S14           | + | + | + |
| Photobacterium profundum 3TCK         | + | + | + |
| Photobacterium sp. SKA34              | + | + | + |
| Planctomyces maris DSM 8797           | + | + | - |
| Plesiocystis pacifica SIR-1           | + | + | + |
| Polaribacter irgensii 23-P            | + | + | - |
| Polaribacter sp. MED152               | + | + | - |
| Prochlorococcus marinus AS9601        | - | - | - |
| Prochlorococcus marinus MIT 9211      | + | - | - |
| Prochlorococcus marinus MIT 9301      | - | - | - |
| Prochlorococcus marinus MIT 9303      | + | - | - |
| Prochlorococcus marinus MIT 9515      | + | - | - |
| Prochlorococcus marinus NATL1A        | + | - | - |
| Pseudoalteromonas sp. TW-7            | + | + | + |
| Pseudoalteromonas tunicata D2         | + | + | + |
| Psychroflexus torquis ATCC 700755     | + | + | - |

|                                    |            |           |           |
|------------------------------------|------------|-----------|-----------|
| Psychromonas sp. CNPT3             | +          | -         | +         |
| Reinekea sp. MED297                | +          | +         | -         |
| Rhodobacterales bacterium HTCC2150 | +          | +         | -         |
| Rhodobacterales bacterium HTCC2654 | +          | -         | -         |
| Rhodobacterales sp. HTCC2255       | +          | +         | -         |
| Roseobacter litoralis Och 149      | +          | -         | -         |
| Roseobacter sp. AzwK-3b            | +          | -         | -         |
| Roseobacter sp. CCS2               | +          | +         | -         |
| Roseobacter sp. MED193             | +          | -         | -         |
| Roseobacter sp. SK209-2-6          | +          | +         | -         |
| Roseovarius nubinihibens ISM       | +          | -         | -         |
| Roseovarius sp. 217                | +          | +         | +         |
| Roseovarius sp. HTCC2601           | +          | +         | -         |
| Roseovarius sp. TM1035             | +          | -         | -         |
| Sagittula stellata E-37            | +          | +         | -         |
| Shewanella benthica KT99           | +          | +         | +         |
| Sphingomonas sp. SKA58             | +          | +         | +         |
| Sulfitobacter sp. EE-36            | +          | -         | -         |
| Sulfitobacter sp. NAS-14.1         | +          | -         | -         |
| Synechococcus sp. BL107            | +          | -         | -         |
| Synechococcus sp. RS9916           | +          | -         | -         |
| Synechococcus sp. RS9917           | +          | -         | -         |
| Synechococcus sp. WH 5701          | +          | -         | -         |
| Synechococcus sp. WH 7805          | +          | -         | -         |
| Thalassospira sp. TrichSKD10       | +          | -         | -         |
| Ulvibacter sp. SCB49               | +          | +         | +         |
| Vibrio alginolyticus 12G01         | +          | +         | +         |
| Vibrio campbellii AND4             | +          | +         | +         |
| Vibrio harveyi HY01                | +          | -         | +         |
| Vibrio parahaemolyticus 16         | +          | -         | +         |
| Vibrio shilonii AK1                | +          | +         | +         |
| Vibrio sp. MED222                  | +          | +         | +         |
| Vibrio splendidus 12B01            | +          | +         | +         |
| Vibrionales bacterium SWAT-3       | +          | +         | +         |
| <b>TOTAL (115)</b>                 | <b>111</b> | <b>56</b> | <b>41</b> |

Supplemental Fig. 1: Reproducibility of Chip-SIP replicate arrays (analyzed by NanoSIMS) from (a) the same hybridization, (b) separate hybridizations of 5% and 100%  $^{13}\text{C}$  *P. stutzeri* RNA, and (c) separate hybridization of *P. stutzeri* labeled with  $^{13}\text{C}$  and  $^{15}\text{N}$ . Each data point represents a distinct probe spot with a different base pair sequence.

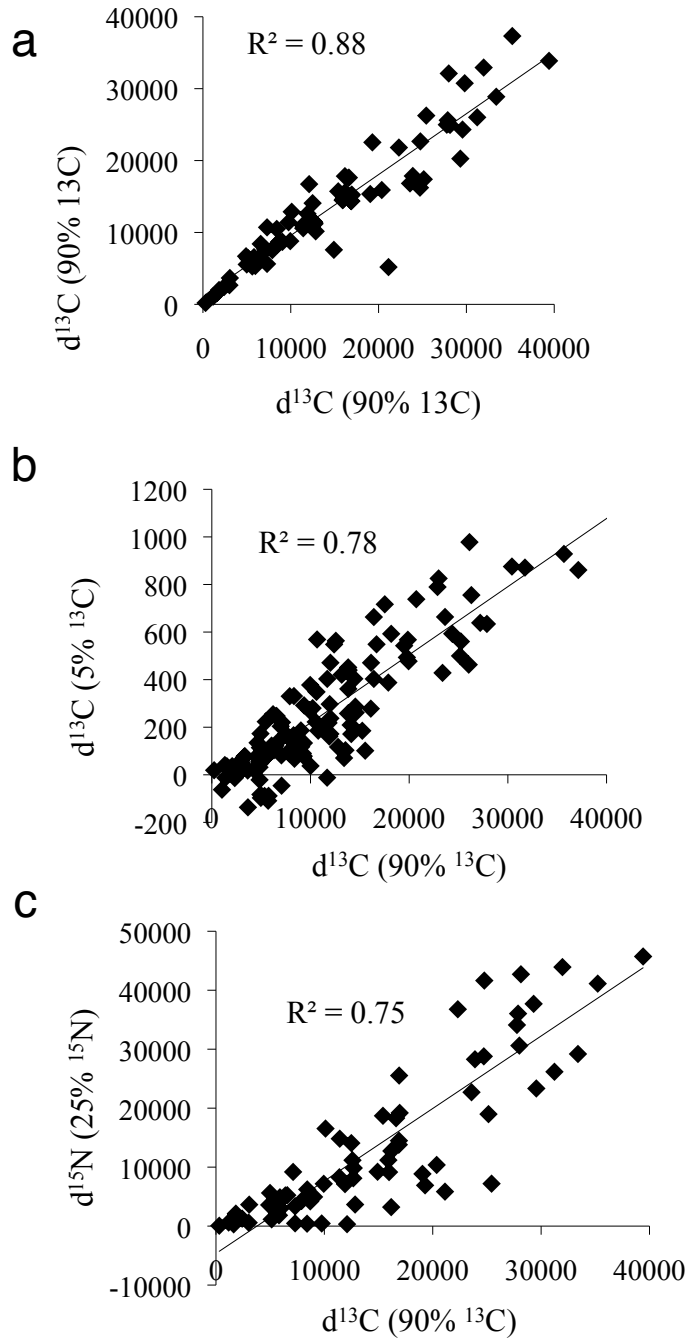

Supplemental Fig. 2: Relative incorporation of  $^{15}\text{N}$ - ammonium and  $^{13}\text{C}$ -glucose detected by chip-SIP for a natural estuarine microbial community from the San Francisco Bay. Units are the slope of permil isotope enrichment over fluorescence (HCE = hybridization corrected enrichment). Each point is the average of probe spots representing the identified taxon. Error bars represent the standard error of the slope calculation.

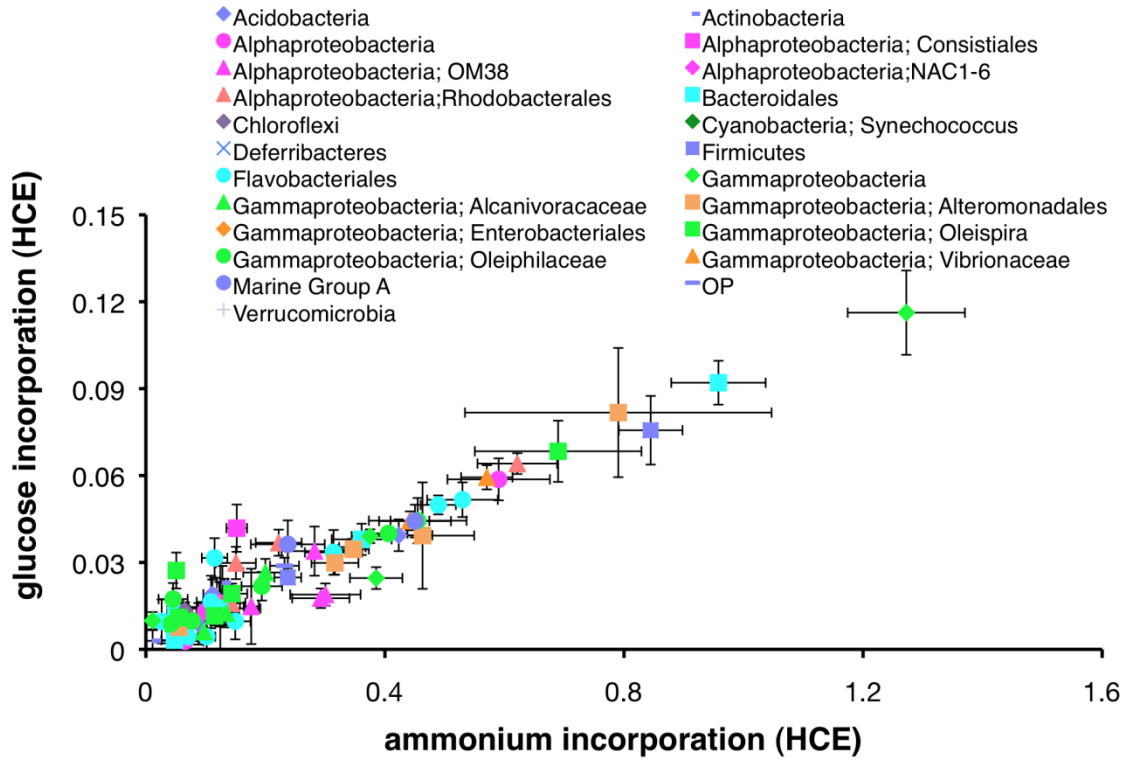

Supplemental Fig. 3: Relative incorporation of amino acids and nucleic acids detected by chip-SIP for a natural estuarine microbial community from the San Francisco Bay. Units are the slope of permil enrichment over fluorescence (HCE = hybridization corrected enrichment).

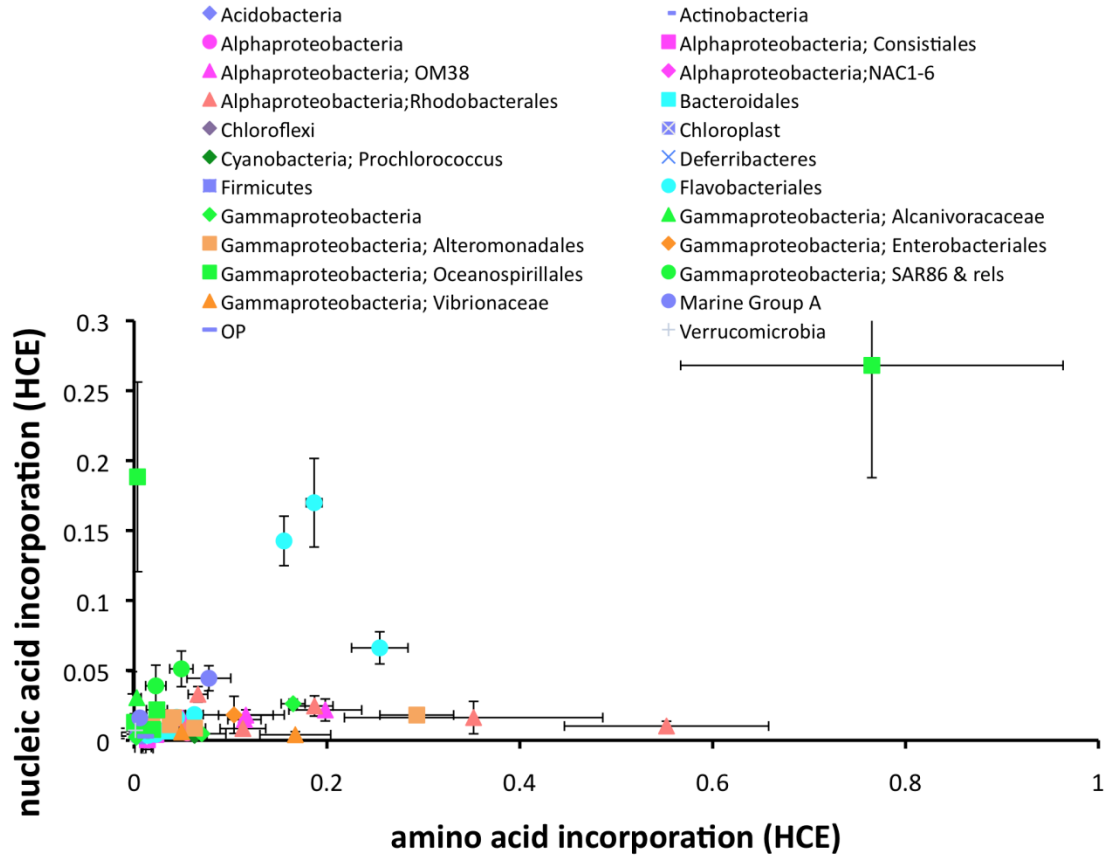





Supplemental Fig. 5: Relative incorporation of fatty acids and nucleic acids detected by chip-SIP for a natural estuarine microbial community. Units are the slope of permil enrichment over fluorescence (HCE = hybridization corrected enrichment).

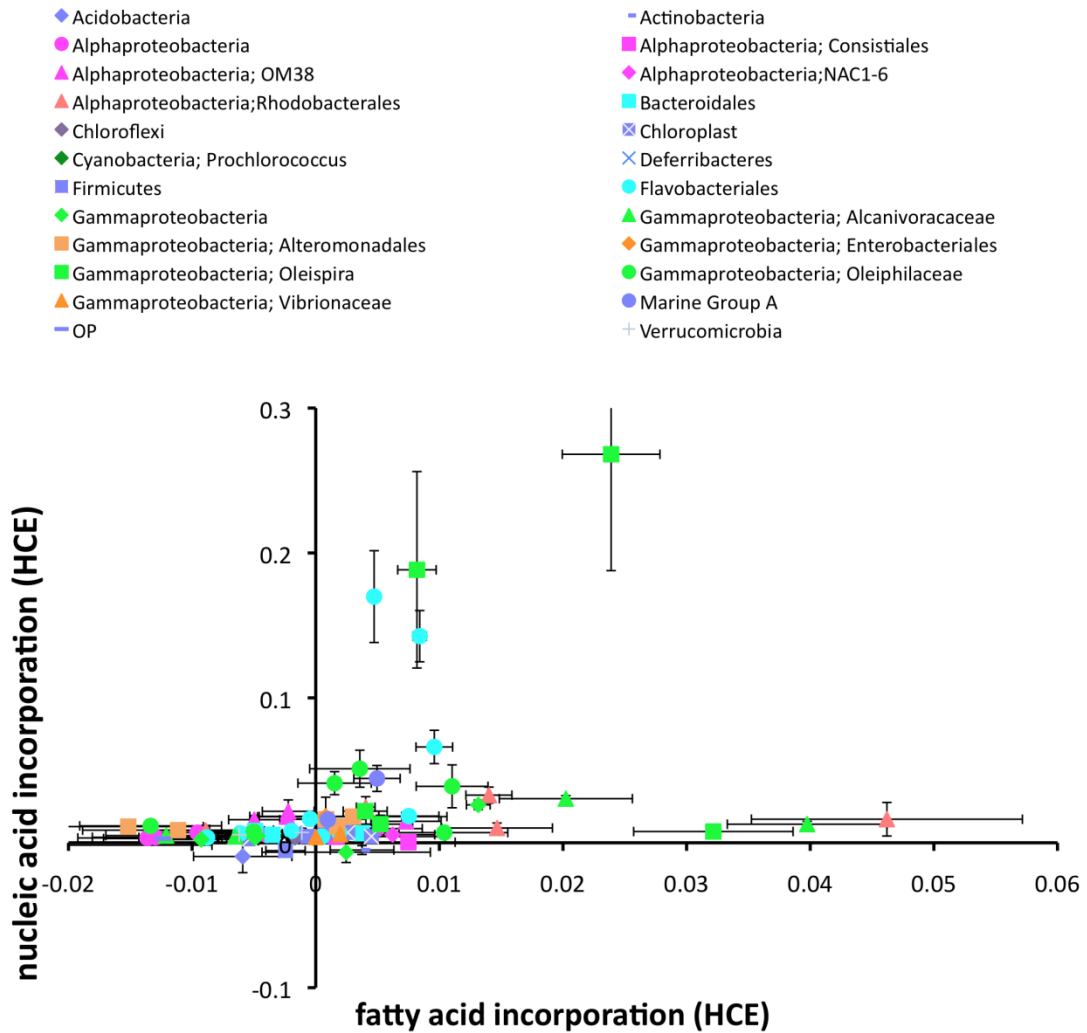

Supplemental Fig. 6: Results of permutations test to determine if amino acid (A), fatty acid (B), and nucleic acid (C) utilizations are randomly distribution on the 16S phylogeny. Presence/absence of a trait (mapped on the phylogeny in Fig. S7) were randomized (N =1000) and the parsimony scores calculated for each replicate. Shown are the frequency distributions of the parsimony scores, arrows indicate the parsimony score of the actual dataset.

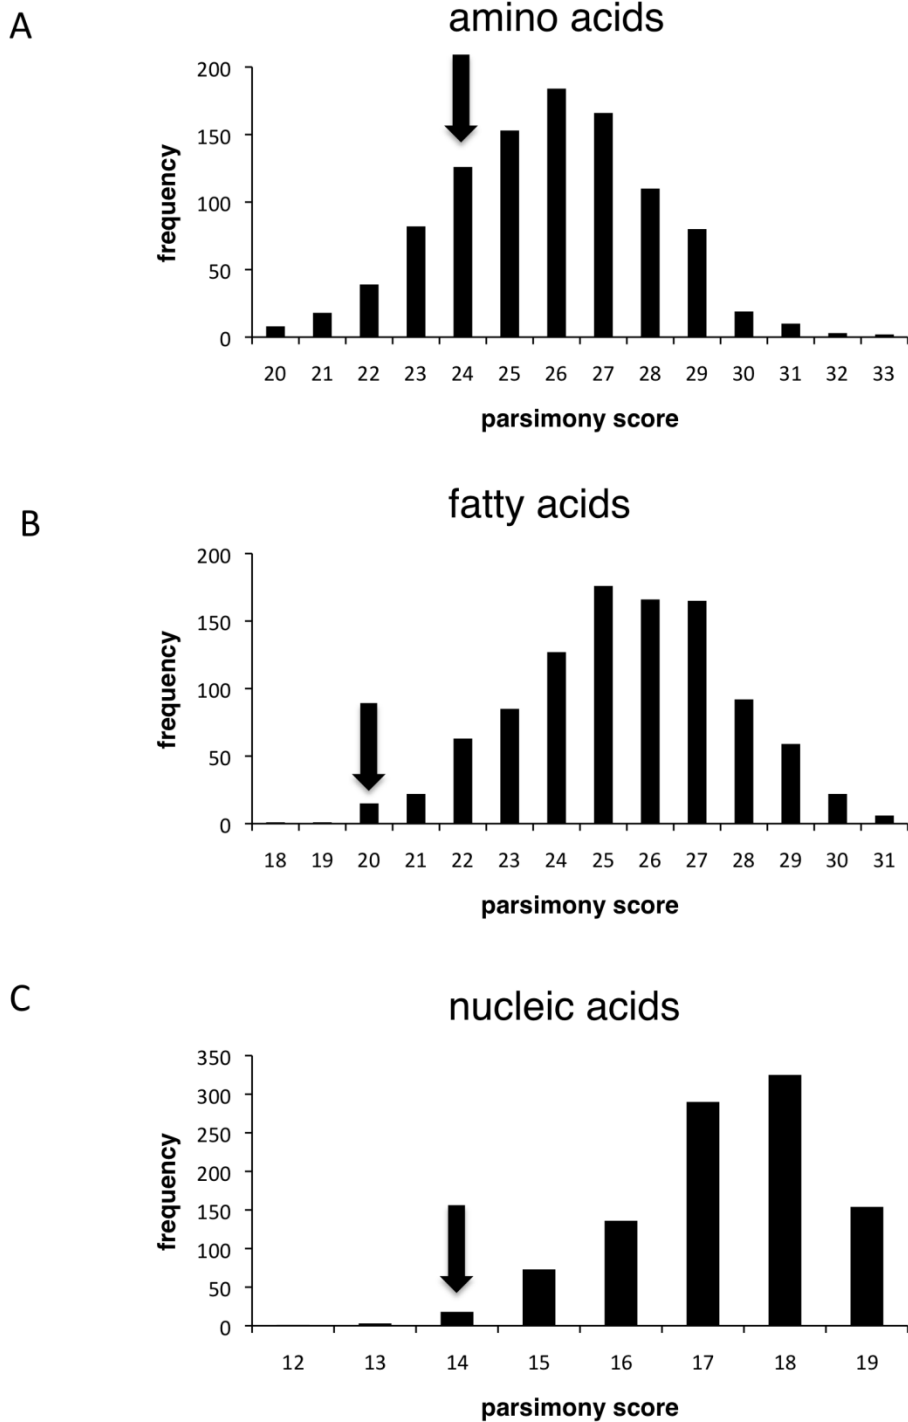

Supplement: ismej2011175x1.pdf [file ismej2011175x1.pdf]
